# Supplementary material for: The genome sequence of Geobacter metallireducens: features of metabolism, physiology and regulation common and dissimilar to Geobacter sulfurreducens
Source: PubMed Central journal article supplement (PMC2700814; doi:10.1186/1471-2180-9-109), 2009-05-27
Supplement: 1471-2180-9-109-S1.pdf [file 1471-2180-9-109-S1.pdf]

Table S1. Genes of *G. metallireducens* with atypical G+C content (more than two standard deviations from the mean).

| Gene                                          | G+C content | Homolog in <i>G. sulfurreducens</i> | Functional annotation                               |
|-----------------------------------------------|-------------|-------------------------------------|-----------------------------------------------------|
| <b>Genes with low G+C content<sup>1</sup></b> |             |                                     |                                                     |
| Gmet_0079                                     | 45.6%       | none                                | hypothetical protein                                |
| Gmet_0080                                     | 41.5%       | none                                | conserved hypothetical protein, C-terminal fragment |
| Gmet_0082                                     | 40.3%       | none                                | hypothetical protein                                |
| Gmet_3579                                     | 45.8%       | none                                | hypothetical protein                                |
| Gmet_0284                                     | 38.2%       | none                                | hypothetical protein                                |
| Gmet_0285                                     | 44.6%       | none                                | putative peptidoglycan-binding domain protein       |
| Gmet_0289                                     | 45.3%       | GSU3170                             | conserved hypothetical protein                      |
| Gmet_0318                                     | 41.8%       | none                                | conserved hypothetical protein                      |
| Gmet_0322                                     | 44.8%       | none                                | hypothetical protein                                |
| Gmet_0444                                     | 47.5%       | GSU3037                             | flagellar filament cap protein FliD                 |
| Gmet_0445                                     | 45.6%       | GSU3036                             | flagellin export facilitator protein FliS           |
| Gmet_0612                                     | 44.0%       | GSU2870                             | ribosomal protein L33                               |
| Gmet_0625                                     | 46.3%       | GSU2858                             | ribosomal protein S10                               |
| Gmet_0628                                     | 38.2%       | GSU2855                             | ribosomal protein L23                               |
| Gmet_0630                                     | 44.0%       | GSU2853                             | ribosomal protein S19                               |
| Gmet_0632                                     | 47.5%       | GSU2851                             | ribosomal protein S3                                |
| Gmet_0634                                     | 40.7%       | GSU2849                             | ribosomal protein L29                               |
| Gmet_0635                                     | 43.8%       | GSU2848                             | ribosomal protein S17                               |
| Gmet_0636                                     | 44.7%       | GSU2847                             | ribosomal protein L14                               |
| Gmet_0637                                     | 45.3%       | GSU2846                             | ribosomal protein L24                               |
| Gmet_0638                                     | 45.0%       | GSU2845                             | ribosomal protein L5                                |
| Gmet_0640                                     | 46.9%       | GSU2843                             | ribosomal protein S8                                |
| Gmet_0641                                     | 47.6%       | GSU2842                             | ribosomal protein L6                                |
| Gmet_0644                                     | 45.0%       | GSU2839                             | ribosomal protein L30                               |
| Gmet_0649                                     | 39.5%       | GSU2834.1                           | ribosomal protein L36                               |
| Gmet_3592                                     | 43.5%       | none                                | hypothetical protein                                |
| Gmet_1000                                     | 44.0%       | none                                | haloacid dehalogenase-like hydrolase                |
| Gmet_1001                                     | 41.1%       | none                                | hypothetical protein                                |
| Gmet_1003                                     | 42.4%       | none                                | hypothetical protein                                |
| Gmet_1114                                     | 40.5%       | none                                | conserved hypothetical protein                      |
| Gmet_1207                                     | 46.2%       | none                                | conserved hypothetical                              |

|           |       |         |                                                                                                         |
|-----------|-------|---------|---------------------------------------------------------------------------------------------------------|
|           |       |         | protein                                                                                                 |
| Gmet_1316 | 47.0% | none    | nucleotidyltransferase-related protein                                                                  |
| Gmet_1317 | 44.1% | none    | protein of unknown function DUF86                                                                       |
| Gmet_1320 | 42.7% | none    | nucleotidyltransferase-related protein                                                                  |
| Gmet_1321 | 45.5% | none    | conserved hypothetical protein                                                                          |
| Gmet_1325 | 46.1% | none    | predicted pyridoxal phosphate-dependent aminotransferase involved in regulation of cell wall biogenesis |
| Gmet_1326 | 40.9% | none    | lipopolysaccharide biosynthesis protein, putative                                                       |
| Gmet_1327 | 29.2% | none    | glycosyl transferase                                                                                    |
| Gmet_1328 | 40.0% | none    | glycosyl transferase, family 11                                                                         |
| Gmet_1329 | 36.3% | none    | glycosyl transferase, putative                                                                          |
| Gmet_1330 | 29.3% | none    | conserved hypothetical protein                                                                          |
| Gmet_1331 | 32.7% | none    | glycosyl transferase, putative                                                                          |
| Gmet_1332 | 33.2% | none    | glycosyl transferase, putative                                                                          |
| Gmet_1334 | 38.1% | none    | glycosyl transferase, putative                                                                          |
| Gmet_1361 | 47.7% | GSU1467 | 2-oxoglutarate:ferredoxin oxidoreductase, ferredoxin subunit                                            |
| Gmet_1399 | 44.8% | GSU1496 | geopilin                                                                                                |
| Gmet_1400 | 45.9% | GSU1497 | conserved hypothetical protein                                                                          |
| Gmet_1401 | 47.7% | GSU1499 | membrane protein, putative                                                                              |
| Gmet_1404 | 42.9% | GSU1498 | membrane protein, putative                                                                              |
| Gmet_1406 | 38.5% | GSU1504 | ABC transporter, membrane protein, ABC-2 family                                                         |
| Gmet_1407 | 43.7% | GSU1505 | ABC transporter, ATP-binding protein                                                                    |
| Gmet_1408 | 45.5% | none    | glycosyl transferase, group 1                                                                           |
| Gmet_1409 | 40.9% | none    | hypothetical protein                                                                                    |
| Gmet_1417 | 47.5% | GSU1521 | integration host factor, alpha subunit                                                                  |
| Gmet_1418 | 47.3% | GSU1522 | transcriptional regulator, MerR family                                                                  |
| Gmet_1494 | 41.6% | none    | hypothetical protein                                                                                    |
| Gmet_1495 | 46.0% | none    | glycosyl transferase, group 1,                                                                          |

|           |       |           |                                                                |
|-----------|-------|-----------|----------------------------------------------------------------|
|           |       |           | putative                                                       |
| Gmet_1496 | 41.5% | none      | glycosyl transferase, group 1                                  |
| Gmet_1497 | 45.5% | none      | glycosyl transferase, putative                                 |
| Gmet_1498 | 38.8% | none      | glycosyl transferase, group 1                                  |
| Gmet_1540 | 44.8% | none      | benzylsuccinate synthase<br>gamma subunit                      |
| Gmet_1557 | 35.6% | none      | hypothetical protein                                           |
| Gmet_1702 | 43.0% | none      | hypothetical protein                                           |
| Gmet_1786 | 44.9% | none      | hypothetical protein                                           |
| Gmet_3606 | 44.2% | GSU1796.1 | conserved hypothetical<br>protein                              |
| Gmet_1951 | 47.6% | GSU1824   | conserved hypothetical<br>protein                              |
| Gmet_2010 | 41.4% | GSU1962   | glycosyl transferase                                           |
| Gmet_2011 | 39.5% | none      | conserved hypothetical<br>protein                              |
| Gmet_2012 | 39.9% | none      | O-antigen/teichoic acid<br>export membrane protein             |
| Gmet_2014 | 46.7% | GSU1961   | glycosyl transferase, family 2                                 |
| Gmet_2015 | 42.4% | none      | rhodanese-related domain<br>selenoprotein, putative            |
| Gmet_2017 | 46.8% | none      | cellulose biosynthesis-like<br>protein                         |
| Gmet_2033 | 46.8% | GSU1988   | conserved hypothetical<br>protein                              |
| Gmet_2037 | 45.9% | none      | <i>N</i> -acylhomoserine lactone<br>synthetase-related protein |
| Gmet_2038 | 43.7% | none      | <i>N</i> -acylhomoserine lactone<br>synthetase-related protein |
| Gmet_2040 | 46.5% | none      | 2-oxoacid dehydrogenase<br>acyltransferase protein             |
| Gmet_2041 | 45.7% | none      | glycosyl transferase, family<br>28-related                     |
| Gmet_2042 | 46.7% | none      | conserved hypothetical<br>protein                              |
| Gmet_2089 | 46.4% | GSU2468   | conserved hypothetical<br>protein                              |
| Gmet_2090 | 39.2% | none      | hypothetical protein                                           |
| Gmet_2092 | 39.0% | none      | conserved hypothetical<br>protein                              |
| Gmet_2179 | 40.9% | none      | glycosyl transferase, putative                                 |
| Gmet_2180 | 35.9% | none      | methyltransferase, putative                                    |
| Gmet_2181 | 39.8% | none      | polysaccharide biosynthesis<br>integral membrane protein       |
| Gmet_2216 | 43.7% | none      | transcriptional regulator,                                     |

|           |       |           |                                          |
|-----------|-------|-----------|------------------------------------------|
|           |       |           | TetR family                              |
| Gmet_2228 | 46.9% | none      | thioesterase, putative                   |
| Gmet_2232 | 44.3% | none      | hypothetical protein                     |
| Gmet_2237 | 45.8% | none      | conserved hypothetical protein           |
| Gmet_2241 | 36.3% | none      | transcriptional regulator, TetR family   |
| Gmet_2242 | 40.5% | none      | conserved hypothetical protein           |
| Gmet_2243 | 44.7% | none      | conserved hypothetical protein           |
| Gmet_2244 | 46.0% | none      | predicted exporter, RND superfamily      |
| Gmet_2246 | 47.2% | none      | AMP-forming acyl-CoA synthetase          |
| Gmet_2254 | 46.1% | none      | ferritin-like domain protein             |
| Gmet_3613 | 47.0% | none      | hypothetical protein                     |
| Gmet_2259 | 47.1% | none      | transcriptional regulator, IclR family   |
| Gmet_2274 | 33.2% | none      | conserved hypothetical protein           |
| Gmet_2275 | 47.6% | none      | conserved hypothetical protein           |
| Gmet_2280 | 36.0% | none      | hypothetical protein                     |
| Gmet_2334 | 33.4% | none      | glycosyl transferase, family 8           |
| Gmet_2335 | 34.6% | none      | conserved hypothetical protein           |
| Gmet_2449 | 46.5% | GSU1323.1 | conserved hypothetical protein           |
| Gmet_2486 | 40.8% | none      | hypothetical protein                     |
| Gmet_2490 | 41.7% | none      | conserved hypothetical protein           |
| Gmet_2500 | 44.6% | none      | conserved hypothetical protein           |
| Gmet_2535 | 42.1% | none      | hypothetical protein                     |
| Gmet_2540 | 40.0% | none      | histidine kinase-like ATPase (HATPase_c) |
| Gmet_2589 | 38.6% | none      | conserved hypothetical protein           |
| Gmet_2590 | 41.9% | none      | hypothetical protein                     |
| Gmet_3623 | 47.5% | none      | hypothetical protein                     |
| Gmet_2754 | 37.8% | none      | hypothetical protein                     |
| Gmet_2755 | 36.6% | none      | hypothetical protein                     |
| Gmet_2795 | 45.3% | none      | hypothetical protein                     |
| Gmet_2798 | 46.3% | none      | hypothetical protein                     |

|            |       |         |                                                |
|------------|-------|---------|------------------------------------------------|
| Gmet_2799  | 46.2% | none    | hypothetical protein                           |
| Gmet_2800  | 39.0% | none    | hypothetical protein                           |
| Gmet_2801  | 39.2% | none    | conserved hypothetical protein                 |
| Gmet_2885  | 39.5% | none    | glycosyl transferase                           |
| Gmet_2886  | 47.1% | none    | SAM-dependent methyltransferase, putative      |
| Gmet_2887  | 45.7% | none    | SAM-dependent methyltransferase, putative      |
| Gmet_2963  | 47.5% | none    | hypothetical protein                           |
| Gmet_2965  | 42.6% | none    | conserved hypothetical protein                 |
| Gmet_2966  | 41.7% | none    | hypothetical protein                           |
| Gmet_2967  | 43.0% | none    | conserved hypothetical protein                 |
| Gmet_3002  | 46.7% | none    | hypothetical protein                           |
| Gmet_3005  | 47.5% | none    | hypothetical protein                           |
| Gmet_3051  | 43.7% | none    | hypothetical protein                           |
| Gmet_3052  | 42.5% | none    | predicted serine protease with TPR domains     |
| Gmet_3057  | 47.3% | none    | integration host factor subunit, alpha subunit |
| Gmet_3629  | 47.5% | none    | hypothetical protein                           |
| Gmet_3135  | 38.9% | none    | conserved hypothetical protein                 |
| Gmet_3630  | 38.9% | none    | conserved hypothetical protein                 |
| Gmet_3631  | 29.8% | none    | hypothetical protein                           |
| Gmet_3632  | 42.0% | none    | hypothetical protein                           |
| Gmet_3139  | 35.4% | none    | hypothetical protein                           |
| Gmet_3634  | 34.8% | none    | hypothetical protein                           |
| Gmet_3142  | 41.2% | none    | resolvase-like protein                         |
| Gmet_3143  | 37.2% | none    | resolvase-like protein                         |
| Gmet_3252  | 44.8% | none    | conserved hypothetical protein                 |
| Gmet_3345  | 42.9% | GSU0348 | NADH dehydrogenase I, K subunit                |
| Gmet_3347  | 45.7% | GSU0346 | NADH dehydrogenase I, I subunit                |
| Gmet_3355  | 47.6% | GSU0338 | NADH dehydrogenase I, A subunit                |
| Gmet_A3565 | 46.0% | none    | RepA protein                                   |
| Gmet_A3566 | 35.8% | none    | hypothetical protein                           |
| Gmet_A3576 | 44.1% | none    | hypothetical protein                           |
| Gmet_A3577 | 45.2% | none    | hypothetical protein                           |

| <b>Genes with high G+C content</b> |       |         |                                                                          |
|------------------------------------|-------|---------|--------------------------------------------------------------------------|
| Gmet_2633                          | 71.7% | GSU1216 | cytochrome <i>bd</i> ubiquinol oxidase assembly ATP-binding protein CydC |
| Gmet_2634                          | 71.1% | GSU1215 | cytochrome <i>bd</i> ubiquinol oxidase assembly ATP-binding protein CydD |
| Gmet_2809                          | 71.4% | none    | protein of unknown function DUF490                                       |
| Gmet_3397                          | 73.4% | none    | hypothetical protein                                                     |

<sup>1</sup>Shading (alternated for clarity) indicates gene clusters that may have been acquired by *G. metallireducens* by lateral gene transfer.
