# Supplementary material for: The genome sequence of Geobacter metallireducens: features of metabolism, physiology and regulation common and dissimilar to Geobacter sulfurreducens
Source: PubMed Central journal article supplement (PMC2700814; doi:10.1186/1471-2180-9-109), 2009-05-27
Supplement: 1471-2180-9-109-S2.pdf [file 1471-2180-9-109-S2.pdf]

Table S2. Enzymes of acyl-CoA metabolism in *G. sulfurreducens* and *G. metallireducens*.

| <i>G. metallireducens</i><br>gene(s)         | <i>G. sulfurreducens</i><br>gene(s) | Function                                                                  |
|----------------------------------------------|-------------------------------------|---------------------------------------------------------------------------|
| <b>Acyl-CoA:carboxylate CoA-transferases</b> |                                     |                                                                           |
| Gmet_1125                                    | no ortholog                         | succinyl:propionate CoA-transferase?                                      |
| Gmet_1730                                    | GSU0174                             | succinyl:acetate CoA-transferase                                          |
| Gmet_3044                                    | GSU0490                             | succinyl:acetate CoA-transferase                                          |
| Gmet_2054                                    | no ortholog                         | acyl-CoA:carboxylate CoA-transferase, putative                            |
| Gmet_3294                                    | no ortholog                         | acyl-CoA:carboxylate CoA-transferase, putative                            |
| Gmet_3304                                    | no ortholog                         | acyl-CoA:carboxylate CoA-transferase, putative                            |
| Gmet_2142                                    | no ortholog                         | acetyl-CoA hydrolase/transferase                                          |
| Gmet_1521-<br>Gmet_1522                      | no ortholog                         | benzylsuccinate CoA-transferase subunits                                  |
| Gmet_3296-<br>Gmet_3297                      | no ortholog                         | acyl-CoA:acetate/3-oxoacid CoA-transferase, subunits                      |
| Gmet_1709-<br>Gmet_1708                      | no ortholog                         | CoA transferase, alpha and beta subunits                                  |
| Gmet_1711                                    | no ortholog                         | CoA transferase, family III                                               |
| Gmet_2205                                    | no ortholog                         | CoA transferase                                                           |
| Gmet_3657                                    | no ortholog                         | CoA transferase, family III fragment                                      |
| <b>Acyl-CoA synthetases</b>                  |                                     |                                                                           |
| Gmet_0086                                    | GSU3029                             | lipid biosynthesis (fusion with acyltransferase)                          |
| Gmet_1613                                    | GSU1677                             | lipid biosynthesis (fusion with acyl carrier protein and acyltransferase) |
| Gmet_0950                                    | GSU2051                             | phenylacetate CoA-ligase, putative                                        |
| Gmet_1818                                    | GSU1729                             | phenylacetate CoA-ligase, putative                                        |
| Gmet_1825                                    | GSU1737                             | phenylacetate CoA-ligase, putative                                        |
| Gmet_1800                                    | no ortholog                         | coenzyme F390 synthetase family protein                                   |
| Gmet_2007                                    | no ortholog                         | coenzyme F390 synthetase family protein                                   |
| Gmet_0256                                    | GSU0229                             | medium-chain fatty acyl CoA-ligase, putative                              |
| Gmet_2692                                    | GSU1103                             | unknown                                                                   |
| Gmet_0306                                    | no ortholog                         | fused to unique domain                                                    |
| Gmet_1469                                    | no ortholog                         | unknown                                                                   |
| Gmet_2020                                    | no ortholog                         | unknown                                                                   |
| Gmet_2229                                    | no ortholog                         | unknown                                                                   |
| Gmet_2246                                    | no ortholog                         | unknown                                                                   |
| Gmet_2252                                    | no ortholog                         | unknown (frameshifted)                                                    |
| Gmet_2143                                    | no ortholog                         | benzoate CoA-ligase                                                       |

|                                                                                                                             |                                 |                                                                                                                                                   |
|-----------------------------------------------------------------------------------------------------------------------------|---------------------------------|---------------------------------------------------------------------------------------------------------------------------------------------------|
| Gmet_2340                                                                                                                   | no ortholog                     | acetyl-CoA synthetase                                                                                                                             |
| <b>Acyl-CoA dehydrogenases or reductases</b>                                                                                |                                 |                                                                                                                                                   |
| Gmet_1523                                                                                                                   | no ortholog                     | benzylsuccinyl-CoA dehydrogenase                                                                                                                  |
| Gmet_1710                                                                                                                   | no ortholog                     | unknown                                                                                                                                           |
| Gmet_1715                                                                                                                   | no ortholog                     | unknown                                                                                                                                           |
| Gmet_2075                                                                                                                   | no ortholog                     | glutaryl-CoA dehydrogenase                                                                                                                        |
| Gmet_2198                                                                                                                   | no ortholog                     | unknown                                                                                                                                           |
| Gmet_2199                                                                                                                   | no ortholog                     | unknown                                                                                                                                           |
| Gmet_2211                                                                                                                   | no ortholog                     | unknown                                                                                                                                           |
| Gmet_2270                                                                                                                   | no ortholog                     | unknown                                                                                                                                           |
| Gmet_3289                                                                                                                   | no ortholog                     | isovaleryl-CoA dehydrogenase                                                                                                                      |
| Gmet_3306                                                                                                                   | no ortholog                     | unknown                                                                                                                                           |
| Gmet_3307                                                                                                                   | no ortholog                     | unknown                                                                                                                                           |
| Gmet_2087                                                                                                                   | no ortholog                     | benzoyl-CoA reductase (electron transfer proteins Gmet_2080, Gmet_2081, Gmet_2083, Gmet_2084, Gmet_2085, Gmet_2086)                               |
| Gmet_2134-<br>Gmet_2135-<br>Gmet_2136                                                                                       | no ortholog                     | 4-hydroxybenzoyl-CoA reductase subunits                                                                                                           |
| <b>Electron transfer flavoprotein <b>beta</b> and <b>alpha</b> subunits and <b>iron-sulfur cluster-binding proteins</b></b> |                                 |                                                                                                                                                   |
| Gmet_0609-<br>Gmet_0610                                                                                                     | GSU2873-<br>GSU2872             | with <i>N</i> -acetylglutamyl-5-phosphate reductase Gmet_0608? The unpaired <b>beta</b> subunit has four frameshifts in <i>G. metallireducens</i> |
| Gmet_0683-<br>Gmet_0684-<br>Gmet_0685                                                                                       | GSU2797-<br>GSU2796-<br>GSU2795 | unknown; related to Gmet_2067-<br>Gmet_2066-Gmet_2065 and Gmet_2258-<br>Gmet_2257-Gmet_2255                                                       |
| Gmet_1525-<br>Gmet_1526-<br>Gmet_1527                                                                                       | no ortholog                     | with benzylsuccinyl-CoA dehydrogenase Gmet_1523?                                                                                                  |
| Gmet_1714-<br>Gmet_1713-<br>Gmet_1712                                                                                       | no ortholog                     | unknown; related to Gmet_2070,<br>Gmet_2153-Gmet_2152, Gmet_2264-<br>Gmet_2263-Gmet_2262 and Gmet_3300-<br>Gmet_3301                              |
| Gmet_2067-<br>Gmet_2066-<br>Gmet_2065                                                                                       | no ortholog                     | unknown; adjacent to succinyl-CoA synthetase; related to Gmet_0683-<br>Gmet_0684-Gmet_0685 and Gmet_2258-<br>Gmet_2257-Gmet_2255                  |
| Gmet_2070                                                                                                                   | no ortholog                     | unknown; adjacent to succinyl-CoA synthetase; iron-sulfur cluster-binding protein related to Gmet_1714 and Gmet_2264                              |
| Gmet_2153-                                                                                                                  | no ortholog                     | with 6-hydroxycyclohex-1-ene-1-carbonyl-                                                                                                          |

|                                         |             |                                                                                                                                                |
|-----------------------------------------|-------------|------------------------------------------------------------------------------------------------------------------------------------------------|
| Gmet_2152                               |             | CoA dehydrogenase Gmet_2151? Related to Gmet_1713-Gmet_1712, Gmet_2263-Gmet_2262 and Gmet_3300-Gmet_3301                                       |
| Gmet_2258-<br>Gmet_2257-<br>Gmet_2255   | no ortholog | unknown; adjacent to succinyl-CoA synthetase; related to Gmet_0683-Gmet_0684-Gmet_0685 and Gmet_2067-Gmet_2066-Gmet_2065                       |
| Gmet_2264-<br>Gmet_2263-<br>Gmet_2262   | no ortholog | unknown; adjacent to succinyl-CoA synthetase; related to Gmet_1714-Gmet_1713-Gmet_1712, Gmet_2070, Gmet_2153-Gmet_2152 and Gmet_3300-Gmet_3301 |
| Gmet_2267-<br>Gmet_2266-<br>Gmet_2265   | no ortholog | unknown                                                                                                                                        |
| Gmet_3300-<br>Gmet_3301                 | no ortholog | unknown; related to Gmet_1713-Gmet_1712, Gmet_2153-Gmet_2152 and Gmet_2263-Gmet_2262                                                           |
| <b>Enoyl-CoA hydratases/isomerases</b>  |             |                                                                                                                                                |
| no ortholog                             | GSU1377     | unknown                                                                                                                                        |
| Gmet_1524                               | no ortholog | phenylitaconyl-CoA hydratase                                                                                                                   |
| Gmet_1572                               | no ortholog | unknown                                                                                                                                        |
| Gmet_1575                               | no ortholog | unknown                                                                                                                                        |
| Gmet_1716                               | no ortholog | unknown; related to Gmet_2071                                                                                                                  |
| Gmet_2057                               | no ortholog | unknown; related to Gmet_3284                                                                                                                  |
| Gmet_2071                               | no ortholog | unknown; related to Gmet_1716                                                                                                                  |
| Gmet_2088                               | no ortholog | 6-oxocyclohex-1-ene-1-carbonyl-CoA hydrolase; related to Gmet_3305                                                                             |
| Gmet_2150                               | no ortholog | cyclohexa-1,5-dienecarbonyl-CoA hydratase                                                                                                      |
| Gmet_2195                               | no ortholog | unknown                                                                                                                                        |
| Gmet_2196                               | no ortholog | unknown                                                                                                                                        |
| Gmet_2204                               | no ortholog | unknown                                                                                                                                        |
| Gmet_2207                               | no ortholog | unknown; related to Gmet_2212                                                                                                                  |
| Gmet_2212                               | no ortholog | unknown; related to Gmet_2207                                                                                                                  |
| Gmet_2224                               | no ortholog | unknown                                                                                                                                        |
| Gmet_3284                               | no ortholog | unknown; related to Gmet_2057                                                                                                                  |
| Gmet_3291                               | no ortholog | unknown                                                                                                                                        |
| Gmet_3305                               | no ortholog | unknown; related to Gmet_2088                                                                                                                  |
| <b>3-hydroxyacyl-CoA dehydrogenases</b> |             |                                                                                                                                                |
| Gmet_1530-<br>Gmet_1531                 | no ortholog | 2-[hydroxy(phenyl)methyl]-succinyl-CoA dehydrogenase subunits                                                                                  |
| Gmet_1717                               | no ortholog | unknown; related to Gmet_2072                                                                                                                  |
| Gmet_2072                               | no ortholog | unknown; related to Gmet_1717                                                                                                                  |
| Gmet_2203                               | no ortholog | unknown                                                                                                                                        |

|                               |             |                                             |
|-------------------------------|-------------|---------------------------------------------|
| Gmet_2269                     | no ortholog | unknown                                     |
| <b>Acyl-CoA thioesterases</b> |             |                                             |
| no ortholog                   | GSU0196     | unknown                                     |
| Gmet_0769                     | GSU0796     | unknown                                     |
| Gmet_1672                     | GSU0993     | unknown                                     |
| Gmet_1692                     | GSU0239     | unknown                                     |
| Gmet_1721                     | no ortholog | unknown                                     |
| Gmet_2063                     | no ortholog | unknown                                     |
| Gmet_2228                     | no ortholog | unknown                                     |
| Gmet_2234                     | no ortholog | unknown                                     |
| Gmet_2238                     | no ortholog | unknown                                     |
| Gmet_2253                     | no ortholog | unknown                                     |
| Gmet_2669                     | GSU1128     | unknown                                     |
| Gmet_3556                     | GSU3461     | unknown                                     |
| <b>Acyl-CoA thiolases</b>     |             |                                             |
| Gmet_0144                     | GSU3313     | unknown                                     |
| Gmet_1528-<br>Gmet_1529       | no ortholog | benzoylsuccinyl-CoA thiolase subunits       |
| Gmet_1719                     | no ortholog | unknown; related to Gmet_2074,<br>Gmet_3302 |
| Gmet_2058                     | no ortholog | unknown                                     |
| Gmet_2074                     | no ortholog | unknown; related to Gmet_1719,<br>Gmet_3302 |
| Gmet_2197                     | no ortholog | unknown                                     |
| Gmet_2213                     | no ortholog | unknown                                     |
| Gmet_2268                     | no ortholog | unknown                                     |
| Gmet_3302                     | no ortholog | unknown; related to Gmet_1719,<br>Gmet_2074 |
