# Supplementary material for: The genome sequence of Geobacter metallireducens: features of metabolism, physiology and regulation common and dissimilar to Geobacter sulfurreducens
Source: PubMed Central journal article supplement (PMC2700814; doi:10.1186/1471-2180-9-109), 2009-05-27
Supplement: 1471-2180-9-109-S3.pdf [file 1471-2180-9-109-S3.pdf]

|                                                                                               |                                                                                                                                 |                                                                                                                                       |
|-----------------------------------------------------------------------------------------------|---------------------------------------------------------------------------------------------------------------------------------|---------------------------------------------------------------------------------------------------------------------------------------|
|                                                                                               | protein, threonine aldolase), possibly also GSU3406, GSU3405, GSU3404 (amino acid transporter)                                  |                                                                                                                                       |
| CGTTACACAAATACGCATATAGTGATA<br>                               <br>CCTTAACAACCCCGTCAAGGGGTGGTA | 5' of GSU2429 (peptidyl-prolyl <i>cis-trans</i> isomerase)                                                                      | Site not detected by ScanAce 5' of Gmet_0815 (GSU2429 homolog), 44% conserved                                                         |
| TGTCAATGTCAAAATGTATTGCTAATA                                                                   | 5' of GSU2150.1 (conserved hypothetical protein)                                                                                | Homologous gene absent                                                                                                                |
| CGTCGCTGTAAACAACAAAACAGAACG<br>                               <br>TTTGCTTGTAATCACCATCACAAAACG | 5' of GSU0490 (succinyl:acetate CoA-transferase)                                                                                | Site not detected by ScanAce 5' of Gmet_3044 (GSU0490 homolog), 63% conserved                                                         |
| ATTGGTTATATTCCAGGCTTTATAACC                                                                   | Within GSU1945 (fibronectin type III domain protein)                                                                            | Homologous gene absent                                                                                                                |
| AAGCCTGGTATTGATATCTCCATAACC<br>                               <br>GAAACGGGGATCGATATCGCCATTACC | Within GSU0660 (4-diphosphocytidyl-2C-methyl-D-erythritol kinase)                                                               | Site not detected by ScanAce within Gmet_2849 (GSU0660 homolog), 70% conserved                                                        |
| AGGCGCAGTAAACATTATTGAATGTCA                                                                   | 5' of GSU3406, GSU3405, GSU3404 (amino acid transporter), possibly also GSU3407, GSU3408 (membrane protein, threonine aldolase) | Homologous genes absent                                                                                                               |
| ATACAAAATAATATTAAAGTGATAGTG                                                                   | Within GSU2395 (conserved hypothetical protein)                                                                                 | Homologous gene absent                                                                                                                |
| ATATATATACAAAATTATATATTGCGT<br>                               <br>ATATATATAAATTCATATATTTTACGT | 5' of GSU0391, GSU0392, GSU0393, GSU0394, GSU0395 (efflux pump), maybe more                                                     | Genes present (except GSU0393) as Gmet_3129, Gmet_3128, Gmet_3127, Gmet_3126, maybe more; site not detected by ScanAce, 74% conserved |
