# Supplementary material for: The genome sequence of Geobacter metallireducens: features of metabolism, physiology and regulation common and dissimilar to Geobacter sulfurreducens
Source: PubMed Central journal article supplement (PMC2700814; doi:10.1186/1471-2180-9-109), 2009-05-27
Supplement: 1471-2180-9-109-S4.pdf [file 1471-2180-9-109-S4.pdf]

| Gene           | Start   | End     | Sequence                                                                                                                                                                                                                                            |
|----------------|---------|---------|-----------------------------------------------------------------------------------------------------------------------------------------------------------------------------------------------------------------------------------------------------|
| Gmet_R1001 (+) | 23218   | 23332   | G T G C T C T T T A C G C C A T C T T T G G - C G C - C G T C C T C - G T C A C C C C G T T G T G G G C G T A G C - T G G G T A C G C C T C C G C G G G T - T C C T G C G G G - T G C A C C A A T C - T G A C G T A A A T A T C A C G T T C C       |
| Gmet_R1002 (+) | 38738   | 38849   | G C G G C T T T T C C G C A A T C T C T G - C G T - T G A T C T T C A T A A T T G C - T T G T G C G C G T A G C - G C T G C T A C G C C T C C G C G A A T C - - A T T C G A T C - - G C C T T G A C C T T G - - C G A A C A A T C C A C G T T T     |
| Gmet_R1003 (+) | 112100  | 112213  | G C C G T A T T C A G G C C A T C T T T G C C G - - G T T C T C A A T C G C A C A - A T C C T C G A C G T A G C - G C T G C T A C G C C T C C G G T T G T A C T C A T T C G C C C G A C C A - A A T C - T G A - C C T A - A A T C C A T C C G C     |
| Gmet_R1004 (+) | 183346  | 183457  | G T G G C T T T T C C G C A A T C T C T G - C G T A - A G T C T T C G G A C C G C - T T G T G C G A C G T A G C - G C T G C T A C G T C T C C G C G A G T C - - C T T C G A C A - - G C C T T G A T C T T G - - C G A A A A A T C C A C G T T T     |
| Gmet_R1005 (+) | 246545  | 246655  | G C G C T T T T T G C C A A T C T C G G - C G T - - T T T C T G G T C A T C G C - G T G T G C G A C G T A G C - G C T G C T A C G T C T C C G T G C T T T - - C T T G A C - - - G C C T T G A C C T T G G - C G A A A A A T C G A C A T T C C       |
| Gmet_R1006 (+) | 281955  | 282068  | G C G C T T T T T A C G C C A T C T C G C - C G C - C G T C C T C - G T C G C T C C C T T G T G G G C G T A G C - G C T G C T A C G C C T C C G C G G T C T C - T C C T G C G G G - T G C G A C G A T C - T G G - T G C A A A A T C C G C A G C C   |
| Gmet_R1007 (+) | 589201  | 589314  | G C G G C T T T C A C A C C G G C T C G C - C G C - C G T C C T C - G T C G C T C C T T T G T G C G C G T A G C - G C T G C T A C G C C T C C G C A G T C T C - T C C T G C G G G - T G C G A C G A T C - C G G - C G C A A A A T C C G C A G C C   |
| Gmet_R1008 (+) | 725630  | 725742  | A A C G C T T T T G G C C A T C T C G G - C G T - - T T C C T G C G T C A T C G C - T T G T G C G A C G T G G C - G C G G C C A C G C C T C C G C G C T C T T - - C C T T G A A G C - C G C C G A C C - T G A C C T C G A A A T C G T T C G C C     |
| Gmet_R1009 (-) | 972328  | 972440  | G C C G C T T T T C C G C C A T C T C G G - C G T - T G T C G T T C G G A A T C A C C T T G T G C G C G T A G C - C C T G C T A C G C C T C C G C G G A T C - - C C T C C T C C - - G C C T T G A C C T T G - - C G A A A A A T C G C C A T T T     |
| Gmet_R1010 (-) | 992050  | 992163  | G C C C A T A T T C C G C G C G C T A A C G A C G T - - C T G C T C - G T C G A G A G G C T C C T C G A C G T A G C - G C T G C T A C G C C T C C G C G G C T C T C T C C T C T C A T C C G C G T T A T C A T C A - C G A - - - A T C T G A C G C C |
| Gmet_R1011 (+) | 993381  | 993494  | G C A A T C T T C C G A C C A T C T C C C - C G C - C G T C C T C G G A A T G C T C G T T G T G C G C G T A G C - G C T G C T A C G C C T C C G C C G G C A T - C C C T G C G G G - T G C G A G G A T C - T G C C G A - - A A T C T T G C G C T     |
| Gmet_R1012 (+) | 994727  | 994840  | G A T A T C T T C C G A C C A T C T C G A - C G C - C G T C C T C G T A A G C C T C G T T G T G C G C G T A G C - G C T G C T A T G C C T C C G C C G G C T - T C C T G C G G G - T G C G C C G A T C - T G C C G A - - A A T C T C T C A C C       |
| Gmet_R1013 (-) | 994880  | 994993  | C G C C A T A T T T G C G C C C T T C C G C C G T - - C G G C T C - G T C G T C A G C T C C T C T A C G T A G C - G C T G C T A C G C C T C C G C G G C T T C C T C C T C C C G A A C G A A T C A T C G - C A A - - - A T C T G A C G C C           |
| Gmet_R1014 (-) | 1161076 | 1161188 | G C C G C T T T T C G C G C A A T C C C G G - C G T - T G C C C T T C G G A T G C T C T T G T G G C G T A G C - G C T G C T A C G C C T C C G C G G C A T C - - A C T C G G A C - - G C C T T G G C C T T G C A G A - - A T T C G A C A C C         |
| Gmet_R1015 (+) | 1169395 | 1169509 | T C C G C C T T C G G G C A T C T T C G A C C C - - G G C C T C A A T C C C A T A - A T C C T C G A C G T A G T - G C T G C T A C G C C T C C G C G G T T A T G C T C A A T C G C C A G G C C A - A A T C - C G C C C A - A A T T C G A A C G C G   |
| Gmet_R1016 (-) | 1259053 | 1259167 | G C G G C T T T C A C G C C A T C T C G C - C G C - C G T C C T C - G T C G T T T C C T T G T G C G C G T A G C T T G G G C T A C G C C T C C G C G G T C G C - T C C T G C G G G - T G C G A C G A T C - T G - C C C A A A T T C C G C A G C C     |
| Gmet_R1017 (-) | 1925872 | 1925983 | G C G C T T T T C C G C A A T C T C T G - C G T - T G A T C T C G G A T T G C - T T G T G C G A C G T A G C - G C T G C T A C G C C T C C G C G A A T C - - C C T C G A T C - - G C C T T G A C C T T G - - C G A A A A A T C C A C G T T T C       |
| Gmet_R1018 (-) | 1936132 | 1936245 | G C G G T C T T T C G A C C A T T T T G C - C G T C C T C C C T C G G T C C G T T C - T T G T G C G C G T A G C - G C T G C T A C G C C T C C G C G A C G G C - - C C T G T G G G G A C G A C A A T C - T G G C G A - - A A T C T C A G C C C       |
| Gmet_R1019 (-) | 2127519 | 2127632 | G C G G A T T T C A C A C C A T C T C G C - C G C - C G T C C T C - G T C G C T C C T T T G T G C G C G T A G C - G C T G C T A C G C C T C C G C A G T C C - T C C T G C G G G - T G C G A C G A T C - T G G - C A C A A A C T C C A C A G C C     |
| Gmet_R1020 (-) | 2557506 | 2557618 | G C C G C T T T C G C G C A A T C T C G G - C G T T G C C C T G C G G T C T G C T C - T T G T G C G C G T A G C - G C T G C T A C G C C T C C G C G G C A T T - - C C T T G C G G G - G C C T T G A C C T T G C A C G A - - A A T C G A C A G C C   |
| Gmet_R1021 (-) | 3494616 | 3494731 | T C C G T C T G C A C G C C A T C T T C G A C C G - - C T C C T C A A T C G C G A - A T C C T C G A C G T A G C T C T G G C T A C G C C T C C G G T T G C G C T C A A T C G T C G C G C C A - A A T C - T G G - C G C A C A T A C G A A C G G       |
| Gmet_R1022 (-) | 3506092 | 3506204 | G C A C T T T T C C G C A A T A T C T G - C G T A - A G T C T T C G G A T T C G C - T T G T G C G C G T A C C A A C A G G T A C G C C T C C G C G A A T T - - C C T C G A C A - - G C C T T G A T C T T G - - C G A A A A A T T G A C G T T C       |
| Gmet_R1023 (+) | 3543874 | 3543987 | G C G G C T T T T G C G C C T G G C G T - T G T - T G C C C T G C G G A G C A C - T T G T G C G C G T A C C A A G G G T A C G C C T C C G C G T G C T T - - G C T C G G G C - - G C T A G C C A G G A - - C A C A A A A T C C A C G T T C           |
| Gmet_R1024 (+) | 3703651 | 3703763 | G C G G C T T T T C C G C A A T C T C T G - C G T - T T A T C T T C G G A A T T T G C T T G T G C G A C G T A G C - G C T G C T A C G C C T C C G C G C A A T T - - C T A G A T C - - G C C T T G A C C T T G - - C G A A A A A T C C A C G T T C   |
