# Supplementary material for: The genome sequence of Geobacter metallireducens: features of metabolism, physiology and regulation common and dissimilar to Geobacter sulfurreducens
Source: PubMed Central journal article supplement (PMC2700814; doi:10.1186/1471-2180-9-109), 2009-05-27
Supplement: 1471-2180-9-109-S5.pdf [file 1471-2180-9-109-S5.pdf]

Table S4. Genes found next to multicopy nucleotide sequences of unknown function in *G. metallireducens*.

| Locus tag                                                          | Nearby Genes                                        | Annotations of nearby gene(s)                                                                                                         |
|--------------------------------------------------------------------|-----------------------------------------------------|---------------------------------------------------------------------------------------------------------------------------------------|
| <b>49 RNA elements containing four GGGACCG repeats (Figure S2)</b> |                                                     |                                                                                                                                       |
| Gmet_H401                                                          | within Gmet_0369                                    | 20 kDa subunit of NADH ubiquinone oxidoreductase or formate dehydrogenase                                                             |
| Gmet_H402                                                          | 3' of Gmet_0382<br>5' of Gmet_0383                  | UDP-N-acetylglucosamine 1-carboxyvinyltransferase<br>ATP phosphoribosyltransferase, short form                                        |
| Gmet_H403                                                          | within Gmet_0415<br>(linker between fused proteins) | fusion protein: D-alanine--D-alanine ligase and cell division protein FtsQ                                                            |
| Gmet_H404                                                          | 3' of Gmet_0433<br>5' of Gmet_0434                  | <i>flgH</i> ; flagellar L-ring protein FlgH<br><i>flgI</i> ; flagellar P-ring protein FlgI                                            |
| Gmet_H405<br>Gmet_H406                                             | 3' of Gmet_0434<br>5' of Gmet_0435                  | <i>flgI</i> ; flagellar P-ring protein FlgI<br>flagellar protein FlgJ-like protein                                                    |
| Gmet_H407                                                          | 3' of Gmet_0467<br>5' of Gmet_0468                  | <i>cobT</i> ; nicotinate-nucleotide--dimethylbenzimidazole phosphoribosyltransferase<br><i>cobS</i> ; cobalamin 5'-phosphate synthase |
| Gmet_H408                                                          | within Gmet_0468                                    | <i>cobS</i> ; cobalamin 5'-phosphate synthase                                                                                         |
| Gmet_H409<br>Gmet_H410                                             | within Gmet_0478                                    | <i>cbiD</i> ; precorrin-5 C1-methyltransferase                                                                                        |
| Gmet_H411<br>Gmet_H412<br>Gmet_H413                                | within Gmet_0485                                    | <i>cobQ</i> ; precorrin-3B C17-methyltransferase/adenosylcobyrinic acid synthase                                                      |
| Gmet_H414<br>Gmet_H415                                             | 3' of Gmet_0544<br>5' of Gmet_0543                  | (R)-2-hydroxyglutaryl-CoA dehydratase activator, putative<br>cytochrome <i>c</i> , 2 heme-binding sites                               |
| Gmet_H416                                                          | 3' of Gmet_0698<br>5' of Gmet_0699                  | <i>metC-1</i> ; cystathionine beta-lyase<br><i>metC-2</i> ; cystathionine beta-lyase                                                  |
| Gmet_H417                                                          | within Gmet_0714<br>5' of Gmet_0715                 | NUDIX hydrolase<br>membrane protein, putative                                                                                         |
| Gmet_H418                                                          | 3' of Gmet_0721<br>5' of Gmet_0722                  | conserved hypothetical protein<br>SEC-C motif domain protein                                                                          |
| Gmet_H419<br>Gmet_H420                                             | 3' of Gmet_0905<br>5' of Gmet_0906                  | ATPase, AAA family<br>conserved hypothetical protein                                                                                  |
| Gmet_H421                                                          | 3' of Gmet_1753<br>5' of Gmet_1752                  | glutamine amidotransferase, class-II<br>archaeal-type glutamate synthase subunit, putative                                            |
| Gmet_H422                                                          | 3' of Gmet_2328<br>5' of Gmet_2327                  | YicC family stress-induced protein TIGR00255<br><i>gmk</i> ; guanylate kinase                                                         |
| Gmet_H423                                                          | 3' of Gmet_2349<br>5' of Gmet_2348                  | lipid A export ATP-binding/membrane protein, MsbA family<br><i>kdtA</i> ; 3-deoxy-D-manno-octulosonic-acid transferase                |
| Gmet_H424                                                          | within Gmet_2545                                    | ABC transporter, ATP-binding protein                                                                                                  |

|                                     |                                     |                                                                                                                                                                                            |
|-------------------------------------|-------------------------------------|--------------------------------------------------------------------------------------------------------------------------------------------------------------------------------------------|
| Gmet_H425<br>Gmet_H426              | 3' of Gmet_2562<br>5' of Gmet_2563  | sensor histidine kinase (PAS, HATPase_c)<br>sigma-54-dependent transcriptional response regulator (REC, sigma-54 interaction, HTH8)                                                        |
| Gmet_H427<br>Gmet_H428              | 3' of Gmet_2563<br>5' of Gmet_2564  | sigma-54-dependent transcriptional response regulator (REC, sigma-54 interaction, HTH8)<br>YcaC-related hydrolase, putative                                                                |
| Gmet_H429                           | within Gmet_2764                    | <i>lpdA-1</i> ; 2-oxoglutarate dehydrogenase complex, E3 protein, dihydrolipoamide dehydrogenase                                                                                           |
| Gmet_H430<br>Gmet_H431<br>Gmet_H432 | within Gmet_2766                    | <i>sucB</i> ; 2-oxoglutarate dehydrogenase, E2 protein, dihydrolipoamide succinyltransferase                                                                                               |
| Gmet_H433                           | 3' of Gmet_2776<br>3' of Gmet_2777  | UDP-2,3-diacetylglucosamine hydrolase, putative<br>conserved hypothetical protein                                                                                                          |
| Gmet_H434<br>Gmet_H435              | 5' of Gmet_2819<br>5' of Gmet_2820  | putative rRNA methylase<br><i>shc-1</i> ; squalene cyclase domain protein                                                                                                                  |
| Gmet_H436                           | 3' of Gmet_2891<br>within Gmet_2890 | conserved hypothetical protein<br>glycosyl transferase, group 1                                                                                                                            |
| Gmet_H437                           | within Gmet_2892                    | glycosyl transferase, family 2                                                                                                                                                             |
| Gmet_H438                           | 3' of Gmet_2898<br>5' of Gmet_2897  | cytochrome <i>c</i> , 8 heme-binding sites<br>conserved hypothetical protein                                                                                                               |
| Gmet_H439                           | within Gmet_2906                    | conserved hypothetical protein                                                                                                                                                             |
| Gmet_H440                           | 3' of Gmet_2909<br>5' of Gmet_2910  | <i>thiE/thiD</i> ; 4-amino-5-hydroxymethyl-2-methylpyrimidine phosphate kinase and thiamin monophosphate synthase<br><i>thiC-1</i> ; 4-amino-5-hydroxymethyl-2-methylpyrimidine synthetase |
| Gmet_H441                           | 3' of Gmet_2986<br>3' of Gmet_2987  | heat shock protein, Hsp20 family<br>ATP alpha-hydrolase TIGR00268                                                                                                                          |
| Gmet_H442                           | 3' of Gmet_3096<br>5' of Gmet_3095  | <i>fliQ</i> ; flagellar biogenesis protein FliQ<br><i>fliR</i> ; flagellar biogenesis protein FliR                                                                                         |
| Gmet_H443                           | 3' of Gmet_3097<br>5' of Gmet_3096  | <i>fliP</i> ; flagellar biogenesis protein FliP<br><i>fliQ</i> ; flagellar biogenesis protein FliQ                                                                                         |
| Gmet_H444                           | 3' of Gmet_3157<br>5' of Gmet_3158  | sensor histidine kinase (HAMP, HisKA, HATPase_c)<br>sigma-54-dependent transcriptional response regulator (REC, sigma-54 interaction, HTH8)                                                |
| Gmet_H445                           | 3' of Gmet_3158<br>5' of Gmet_3159  | sigma-54-dependent transcriptional response regulator (REC, sigma-54 interaction, HTH8)<br>alpha-glucan phosphorylase                                                                      |
| Gmet_H446                           | 3' of Gmet_3392<br>5' of Gmet_3391  | 3-polyprenyl-4-hydroxybenzoate decarboxylase, putative<br>thiamin biosynthesis enzyme ThiH-related radical SAM domain protein                                                              |
| Gmet_H447<br>Gmet_H448              | 3' of Gmet_3430<br>5' of Gmet_3431  | heterodisulfide reductase, iron-sulfur binding subunit, putative                                                                                                                           |

|                                                                                  |                                    |                                                                                   |
|----------------------------------------------------------------------------------|------------------------------------|-----------------------------------------------------------------------------------|
|                                                                                  |                                    | heterodisulfide reductase, cytochrome reductase subunit                           |
| Gmet_H449                                                                        | 3' of Gmet_3549<br>3' of Gmet_3550 | PPIC-type PPIASE domain protein, SurA family<br>DnaJ-related molecular chaperone  |
| <b>24 pairs of predicted global regulator binding sites, class 1 (Figure S3)</b> |                                    |                                                                                   |
| Gmet_I101A                                                                       | 3' of Gmet_0006                    | conserved hypothetical protein                                                    |
| Gmet_I101B                                                                       | 3' of Gmet_0007                    | transposase of IS <i>Gme9</i> , IS481 family                                      |
| Gmet_I102A                                                                       | 5' of Gmet_0045                    | transposase of IS <i>Gme8</i> , IS110 family                                      |
| Gmet_I102B                                                                       | 3' of Gmet_0046                    | transposase of IS <i>Gme8</i> , IS110 family                                      |
| Gmet_I103A                                                                       | 5' of Gmet_0093                    | transposase of IS <i>Gme9</i> , IS481 family                                      |
| Gmet_I103B                                                                       | 5' of Gmet_0094                    | transposase of IS <i>Gme8</i> , IS110 family                                      |
| Gmet_I104A                                                                       | 3' of Gmet_0131                    | conserved hypothetical protein                                                    |
| Gmet_I104B                                                                       | 5' of Gmet_0132                    | transposase of IS <i>Gme8</i> , IS110 family                                      |
| Gmet_I105A                                                                       | 3' of Gmet_0179                    | DTW domain protein                                                                |
| Gmet_I105B                                                                       | 5' of Gmet_0180                    | putative dehydratase, NodN/MaoC domain                                            |
| Gmet_I106A                                                                       | 5' of Gmet_0488                    | transposase of IS <i>Gme8</i> , IS110 family                                      |
| Gmet_I106B                                                                       | 3' of Gmet_0489                    | conserved hypothetical protein                                                    |
| Gmet_I107A                                                                       | 3' of Gmet_0663                    | nitrogenase molybdenum-iron protein, alpha chain                                  |
| Gmet_I107B                                                                       | 5' of Gmet_0664                    | nitrogenase molybdenum-iron protein, beta subunit                                 |
| Gmet_I108A                                                                       | 3' of Gmet_0669                    | nitrogenase molybdenum-iron cofactor biosynthesis                                 |
| Gmet_I108B                                                                       | 5' of Gmet_0670                    | protein NifEN<br>transposase of IS <i>Gme8</i> , IS110 family                     |
| Gmet_I109A                                                                       | 3' of Gmet_0722                    | SEC-C motif domain protein                                                        |
| Gmet_I109B                                                                       | 5' of Gmet_0723                    | transposase of IS <i>Gme8</i> , IS110 family                                      |
| Gmet_I110A                                                                       | 3' of Gmet_0811                    | efflux pump outer membrane protein                                                |
| Gmet_I110B                                                                       | 3' of Gmet_0812                    | sigma-54-dependent transcriptional response regulator (REC, sigma-54 interaction) |
| Gmet_I111A                                                                       | 3' of Gmet_0891                    | DNA topoisomerase I                                                               |
| Gmet_I111B                                                                       | 5' of Gmet_0892                    | conserved hypothetical protein                                                    |
| Gmet_I112A                                                                       | 5' of Gmet_0958                    | transposase of IS <i>Gme8</i> , IS110 family                                      |
| Gmet_I112B                                                                       | 5' of Gmet_0959                    | type IV prepilin-like proteins leader peptide processing enzyme                   |
| Gmet_I113A                                                                       | 3' of Gmet_1142                    | conserved hypothetical protein                                                    |
| Gmet_I113B                                                                       | 5' of Gmet_1143                    | transposase of IS <i>Gme8</i> , IS110 family                                      |
| Gmet_I114A                                                                       | 5' of Gmet_1717                    | 3-hydroxyacyl-CoA dehydrogenase                                                   |
| Gmet_I114B                                                                       | 5' of Gmet_1718                    | transposase of IS <i>Gme8</i> , IS110 family                                      |
| Gmet_I115A                                                                       | 5' of Gmet_2067                    | electron transfer flavoprotein, beta subunit                                      |
| Gmet_I115B                                                                       | 3' of Gmet_2068                    | succinyl-CoA synthetase, alpha subunit                                            |
| Gmet_I116A                                                                       | 5' of Gmet_2072                    | 3-hydroxyacyl-CoA dehydrogenase                                                   |
| Gmet_I116B                                                                       | 5' of Gmet_2073                    | transposase of IS <i>Gme8</i> , IS110 family                                      |
| Gmet_I117A                                                                       | 5' of Gmet_2493                    | tryptophan synthase, alternate beta subunit, putative                             |
| Gmet_I117B                                                                       | 3' of Gmet_2494                    | indole-3-glycerol phosphate synthase                                              |
| Gmet_I118A                                                                       | 5' of Gmet_2517                    | efflux pump outer membrane protein                                                |
| Gmet_I118B                                                                       | 3' of Gmet_2518                    | efflux pump inner membrane protein                                                |

|                                                                                  |                 |                                                                                                                          |
|----------------------------------------------------------------------------------|-----------------|--------------------------------------------------------------------------------------------------------------------------|
| Gmet_I119A                                                                       | 3' of Gmet_2784 | cobyrinic acid a,c-diamide synthase family protein                                                                       |
| Gmet_I119B                                                                       | 3' of Gmet_2785 | conserved hypothetical protein                                                                                           |
| Gmet_I120A                                                                       | 3' of Gmet_2809 | protein of unknown function DUF490                                                                                       |
| Gmet_I120B                                                                       | 5' of Gmet_2810 | transposase of IS <i>Gme8</i> , IS110 family                                                                             |
| Gmet_I121A                                                                       | 5' of Gmet_2975 | transposase of IS <i>Gme8</i> , IS110 family                                                                             |
| Gmet_I121B                                                                       | 3' of Gmet_2976 | peptidyl-tRNA hydrolase-related protein                                                                                  |
| Gmet_I122A                                                                       | 3' of Gmet_3244 | conserved hypothetical protein                                                                                           |
| Gmet_I122B                                                                       | 5' of Gmet_3245 | FAD-dependent dehydrogenase with ferredoxin-like domain                                                                  |
| Gmet_I123A                                                                       | 5' of Gmet_3328 | glyoxalase/bleomycin resistance protein/dioxygenase                                                                      |
| Gmet_I123B                                                                       | 3' of Gmet_3329 | superfamily protein<br>periplasmically oriented, membrane bound [NiFe]-hydrogenase maturation protease                   |
| Gmet_I124A                                                                       | 3' of Gmet_3428 | heterodisulfide reductase subunit                                                                                        |
| Gmet_I124B                                                                       | 5' of Gmet_3429 | transposase of IS <i>Gme8</i> , IS110 family                                                                             |
| <b>21 pairs of predicted global regulator binding sites, class 2 (Figure S4)</b> |                 |                                                                                                                          |
| Gmet_I201A                                                                       | 3' of Gmet_0052 | peptidase, M16 family                                                                                                    |
| Gmet_I201B                                                                       | 3' of Gmet_0053 | transglutaminase domain protein                                                                                          |
| Gmet_I202A                                                                       | 5' of Gmet_0188 | metal-dependent hydrolase, beta-lactamase                                                                                |
| Gmet_I202B                                                                       | 3' of Gmet_0189 | superfamily III<br>delta-aminolevulinic acid dehydratase                                                                 |
| Gmet_I203A                                                                       | 3' of Gmet_0471 | 4-amino-5-hydroxymethyl-2-methylpyrimidine                                                                               |
| Gmet_I203B                                                                       | 5' of Gmet_0472 | synthetase<br>cobalt ABC transporter membrane protein CbiM, N-terminal domain                                            |
| Gmet_I204A                                                                       | 3' of Gmet_0564 | conserved hypothetical protein                                                                                           |
| Gmet_I204B                                                                       | 5' of Gmet_0565 | conserved hypothetical protein                                                                                           |
| Gmet_I205A                                                                       | 3' of Gmet_0568 | ABC transporter, periplasmic protein                                                                                     |
| Gmet_I205B                                                                       | 5' of Gmet_0569 | conserved hypothetical protein                                                                                           |
| Gmet_I206A                                                                       | 3' of Gmet_0696 | sensor histidine kinase (HisKA, HATPase_c)                                                                               |
| Gmet_I206B                                                                       | 5' of Gmet_0697 | inositol-1-monophosphatase                                                                                               |
| Gmet_I207A                                                                       | 5' of Gmet_0776 | sigma-54-dependent nitrogen response regulator                                                                           |
| Gmet_I207B                                                                       | 3' of Gmet_0777 | NtrX (REC, sigma-54 interaction, HTH8)<br>nitrogen regulation sensor histidine kinase NtrY (HAMP, PAS, HisKA, HATPase_c) |
| Gmet_I208A                                                                       | 3' of Gmet_0990 | phosphoglucomutase/phosphomannomutase family                                                                             |
| Gmet_I208B                                                                       | 5' of Gmet_0991 | protein<br>nitrogen fixation iron-sulfur cluster assembly protein NifU                                                   |
| Gmet_I209A                                                                       | 3' of Gmet_2509 | pyruvate dehydrogenase complex E1 protein, alpha subunit                                                                 |
| Gmet_I209B                                                                       | 5' of Gmet_2510 | pyruvate dehydrogenase complex E1 protein, beta subunit                                                                  |
| Gmet_I210A                                                                       | 3' of Gmet_2572 | DUF343-containing conserved hypothetical protein                                                                         |
| Gmet_I210B                                                                       | 3' of Gmet_2573 | ATP-dependent RNA helicase RhIE                                                                                          |

|                                                                                 |                 |                                                                                               |
|---------------------------------------------------------------------------------|-----------------|-----------------------------------------------------------------------------------------------|
| Gmet_I211A                                                                      | 5' of Gmet_2674 | predicted zinc-dependent hydrolase                                                            |
| Gmet_I211B                                                                      | 3' of Gmet_2675 | metal-dependent phosphohydrolase, HD superfamily                                              |
| Gmet_I212A                                                                      | 3' of Gmet_2723 | peroxiredoxin                                                                                 |
| Gmet_I212B                                                                      | 3' of Gmet_2724 | ATP-dependent helicase, UvrD superfamily                                                      |
| Gmet_I213A                                                                      | 3' of Gmet_2737 | sensor histidine kinase (HAMP, HisKA,                                                         |
| Gmet_I213B                                                                      | 5' of Gmet_2738 | HATPase_c)<br>molybdopterin-binding iron-sulfur oxidoreductase<br>MopB-3                      |
| Gmet_I214A                                                                      | 3' of Gmet_2979 | hypothetical protein                                                                          |
| Gmet_I214B                                                                      | 3' of Gmet_2980 | ErfK/YbiS/YcfS/YnhG family protein                                                            |
| Gmet_I215A                                                                      | 3' of Gmet_2993 | histidine triad (HIT) family hydrolase                                                        |
| Gmet_I215B                                                                      | 5' of Gmet_2994 | endonuclease IV                                                                               |
| Gmet_I216A                                                                      | 3' of Gmet_3236 | magnesium-dependent DNase TatD                                                                |
| Gmet_I216B                                                                      | 5' of Gmet_3237 | YgdL family protein                                                                           |
| Gmet_I217A                                                                      | 3' of Gmet_3245 | FAD-dependent dehydrogenase with ferredoxin-like                                              |
| Gmet_I217B                                                                      | 5' of Gmet_3246 | domain<br>iron-sulfur oxidoreductase, putative                                                |
| Gmet_I218A                                                                      | 3' of Gmet_3248 | biotin-dependent acyl-CoA carboxyltransferase                                                 |
| Gmet_I218B                                                                      | 5' of Gmet_3249 | conserved hypothetical protein                                                                |
| Gmet_I219A                                                                      | 3' of Gmet_3252 | conserved hypothetical protein                                                                |
| Gmet_I219B                                                                      | 5' of Gmet_3253 | glyoxalase/bleomycin resistance protein/dioxygenase<br>family protein                         |
| Gmet_I220A                                                                      | 5' of Gmet_3273 | conserved hypothetical protein                                                                |
|                                                                                 | 5' of Gmet_3274 | conserved hypothetical protein                                                                |
| Gmet_I221A                                                                      | 3' of Gmet_3402 | thiamine biosynthesis protein ThiI-related adenine                                            |
| Gmet_I221B                                                                      | 3' of Gmet_3403 | nucleotide alpha hydrolase superfamily protein<br>transglycosylase-related protein            |
| Gmet_I222A                                                                      | 3' of Gmet_3425 | heterodisulfide reductase, subunit B                                                          |
| Gmet_I222B                                                                      | 5' of Gmet_3426 | heterodisulfide reductase, subunit A                                                          |
| <b>8 pairs of predicted global regulator binding sites, class 3 (Figure S5)</b> |                 |                                                                                               |
| Gmet_I301A                                                                      | 3' of Gmet_0301 | <i>moaA-1</i> ; molybdopterin precursor Z synthesis                                           |
| Gmet_I301B                                                                      | 5' of Gmet_0302 | protein MoaA<br><i>mosC-1</i> ; molybdenum cofactor sulfurase C-terminal<br>domain protein    |
| Gmet_I302A                                                                      | 3' of Gmet_0484 | <i>cbiG</i> ; precorrin-3B C17-methyltransferase                                              |
| Gmet_I302B                                                                      | 5' of Gmet_0485 | <i>cobQ</i> ; precorrin-3B C17-<br>methyltransferase/adenosylcobyrinic acid synthase          |
| Gmet_I303A                                                                      | 3' of Gmet_1103 | <i>greB</i> ; transcription elongation factor GreB                                            |
| Gmet_I303B                                                                      | 5' of Gmet_1104 | mannose-1-phosphate guanylyltransferase                                                       |
| Gmet_I304A                                                                      | 3' of Gmet_2672 | conserved hypothetical protein                                                                |
| Gmet_I304B                                                                      | 3' of Gmet_2673 | <i>coaBC</i> ; phosphopantothencysteine<br>decarboxylase/phosphopantothenate--cysteine ligase |
| Gmet_I305A                                                                      | 5' of Gmet_3074 | conserved hypothetical protein TIGR00294                                                      |
| Gmet_I305B                                                                      | 3' of Gmet_3075 | adenosine nucleotide-binding predicted<br>transcriptional regulator ExsB                      |

|                                                                         |                                     |                                                                                                                                                                               |
|-------------------------------------------------------------------------|-------------------------------------|-------------------------------------------------------------------------------------------------------------------------------------------------------------------------------|
| Gmet_I306A                                                              | 5' of Gmet_3115                     | <i>flgB</i> ; flagellar basal-body rod protein FlgB                                                                                                                           |
| Gmet_I306B                                                              | 3' of Gmet_3116                     | conserved hypothetical protein                                                                                                                                                |
| Gmet_I307A                                                              | 3' of Gmet_3198                     | <i>proB</i> ; glutamate 5-kinase                                                                                                                                              |
| Gmet_I307B                                                              | 5' of Gmet_3199                     | <i>proA</i> ; glutamyl-5-phosphate reductase                                                                                                                                  |
| Gmet_I308A                                                              | 3' of Gmet_3432                     | sensor histidine kinase (HisKA, HATPase_c)                                                                                                                                    |
| Gmet_I308B                                                              | 3' of Gmet_3433                     | aspartate/tyrosine/aromatic aminotransferase                                                                                                                                  |
| <b>19 predicted global regulator binding sites, class 4 (Figure S6)</b> |                                     |                                                                                                                                                                               |
| Gmet_I401                                                               | 3' of Gmet_0306<br>5' of Gmet_0307  | conserved hypothetical protein (CoA-binding, CoA ligase, unique)<br>conserved hypothetical protein                                                                            |
| Gmet_I402                                                               | 5' of Gmet_0770                     | <i>ppsA</i> ; phosphoenolpyruvate synthase                                                                                                                                    |
| Gmet_I403                                                               | 3' of Gmet_0771                     | <i>wrbA</i> ; tryptophan repressor TrpR-binding flavodoxin                                                                                                                    |
| Gmet_I404                                                               | 5' of Gmet_2021                     | hypothetical protein                                                                                                                                                          |
| Gmet_I405                                                               | 3' of Gmet_2022                     | hypothetical protein                                                                                                                                                          |
| Gmet_I406                                                               | 5' of Gmet_2160<br>5' of Gmet_2161  | transposase, IS <i>Gme6</i><br>UDP-N-acetylmuramyl pentapeptide phosphotransferase/UDP-N-acetylglucosamine-1-phosphate transferase/peptidyl-prolyl <i>cis-trans</i> isomerase |
| Gmet_I407                                                               | 5' of Gmet_2580                     | excinuclease ABC family protein                                                                                                                                               |
| Gmet_I408                                                               | 3' of Gmet_2581                     | mechanosensitive ion channel family protein                                                                                                                                   |
| Gmet_I409                                                               |                                     |                                                                                                                                                                               |
| Gmet_I410                                                               | 5' of Gmet_2715<br>3' of Gmet_2716  | hypoxanthine/guanine transport membrane protein<br>hypoxanthine/guanine phosphoribosyltransferase, putative                                                                   |
| Gmet_I411                                                               | 3' of Gmet_2721<br>3' of Gmet_2722  | GAF domain/GGDEF domain protein<br>peptidyl-prolyl <i>cis-trans</i> isomerase, cyclophilin-type                                                                               |
| Gmet_I412                                                               | 5' of Gmet_2734<br>5' of Gmet_2735  | radical SAM domain iron-sulfur oxidoreductase, putative<br>ligand-gated TonB-dependent porin                                                                                  |
| Gmet_I413                                                               | 5' of Gmet_3080                     | thioredoxin/NifU-like domain protein                                                                                                                                          |
| Gmet_I414                                                               | 3' of Gmet_3081                     | integrase core domain protein, IS <i>Gme9</i>                                                                                                                                 |
| Gmet_I415                                                               | 5' of Gmet_R0051<br>5' of Gmet_3391 | proline tRNA<br>hypothetical protein                                                                                                                                          |
| Gmet_I416                                                               | 5' of Gmet_3416<br>3' of Gmet_3417  | ABC transporter, ATP-binding/membrane protein<br>predicted GTPase MglA                                                                                                        |
| Gmet_I417                                                               | 5' of Gmet_3499                     | OmpA domain protein                                                                                                                                                           |
| Gmet_I418                                                               | 3' of Gmet_3500                     | conserved hypothetical protein                                                                                                                                                |
| Gmet_I419                                                               | 3' of Gmet_3508                     | efflux pump membrane fusion protein                                                                                                                                           |
| Gmet_I420                                                               | 5' of Gmet_3509                     | efflux pump inner membrane protein                                                                                                                                            |
| <b>24 predicted regulatory short RNAs, group 1 (Figure S1)</b>          |                                     |                                                                                                                                                                               |
| Gmet_R1001                                                              | 5' of Gmet_0016                     | <i>hemE</i> ; uroporphyrinogen decarboxylase                                                                                                                                  |
| Gmet_R1002                                                              | 5' of Gmet_0031                     | conserved hypothetical protein                                                                                                                                                |
| Gmet_R1003                                                              | 3' of Gmet_0088                     | sigma-54-dependent transcriptional regulator                                                                                                                                  |
|                                                                         | 3' of Gmet_0089                     | ATP-dependent DNA helicase UvrD/REP                                                                                                                                           |

|                                                                         |                                    |                                                                                            |
|-------------------------------------------------------------------------|------------------------------------|--------------------------------------------------------------------------------------------|
| Gmet_R1004                                                              | 5' of Gmet_0153                    | NADH dehydrogenase I, B/C/D subunits                                                       |
| Gmet_R1005                                                              | 5' of Gmet_0213                    | L,L-diaminopimelate aminotransferase                                                       |
| Gmet_R1006                                                              | 5' of Gmet_0251                    | cytochrome <i>c</i> oxidase, subunit IV                                                    |
| Gmet_R1007                                                              | 5' of Gmet_0552                    | transketolase, C-terminal domain                                                           |
| Gmet_R1008                                                              | 5' of Gmet_0663                    | nitrogenase molybdenum-iron protein, alpha chain                                           |
| Gmet_R1009                                                              | 5' of Gmet_0882                    | polysaccharide deacetylase-related                                                         |
| Gmet_R1010                                                              | 5' of Gmet_0902                    | saccharopine dehydrogenase                                                                 |
| Gmet_R1011                                                              | 5' of Gmet_0903                    | <i>nspC</i> ; carboxynorspermidine decarboxylase                                           |
| Gmet_R1012,<br>Gmet_R1013                                               | 5' of Gmet_0904                    | <i>speA</i> ; biosynthetic arginine decarboxylase                                          |
| Gmet_R1014                                                              | 5' of Gmet_1045                    | aldehyde ferredoxin oxidoreductase, tungsten-containing                                    |
| Gmet_R1015                                                              | 5' of Gmet_1054                    | sensor histidine kinase (FhlA, HisKA, HATPase_c)                                           |
| Gmet_R1016                                                              | 5' of Gmet_1139                    | phage baseplate outer wedge protein                                                        |
| Gmet_R1017                                                              | 5' of Gmet_1713                    | electron transfer flavoprotein, beta subunit                                               |
| Gmet_R1018                                                              | 5' of Gmet_1721                    | thioesterase superfamily protein                                                           |
| Gmet_R1019                                                              | 5' of Gmet_1905                    | <i>cysT</i> ; sulfate ABC transporter, membrane protein CysT                               |
| Gmet_R1020                                                              | 5' of Gmet_2257                    | electron transfer flavoprotein, alpha subunit                                              |
| Gmet_R1021                                                              | 3' of Gmet_3093                    | conserved hypothetical protein                                                             |
|                                                                         | 3' of Gmet_3094                    | <i>flhB</i> ; flagellar biosynthesis protein FlhB                                          |
| Gmet_R1022                                                              | 5' of Gmet_3106                    | <i>fliK</i> ; flagellar hook-length control protein FliK                                   |
| Gmet_R1023                                                              | 3' of Gmet_3145                    | ferritin-like domain protein                                                               |
|                                                                         | 3' of Gmet_3146                    | peptidyl-prolyl <i>cis-trans</i> isomerase, FKBP-type                                      |
| Gmet_R1024                                                              | 5' of Gmet_3291                    | enoyl-CoA hydratase/isomerase                                                              |
| <b>4 predicted short RNAs of unknown function, group 2 (Figure S8a)</b> |                                    |                                                                                            |
| Gmet_R2001                                                              | 5' of Gmet_0082<br>3' of Gmet_0083 | hypothetical protein<br>hypothetical protein                                               |
| Gmet_R2002                                                              | 5' of Gmet_1003                    | hypothetical protein                                                                       |
| Gmet_R2003                                                              | 5' of Gmet_2755                    | hypothetical protein                                                                       |
| Gmet_R2004                                                              | 5' of Gmet_2967<br>3' of Gmet_2968 | conserved hypothetical protein<br>conserved hypothetical protein                           |
| <b>16 predicted regulatory short RNAs, group 3 (Figure S7)</b>          |                                    |                                                                                            |
| Gmet_R3001                                                              | 5' of Gmet_0131                    | conserved hypothetical protein                                                             |
| Gmet_R3002                                                              | 5' of Gmet_0232                    | conserved hypothetical protein                                                             |
| Gmet_R3003                                                              | 5' of Gmet_0241,<br>Gmet_0240      | conserved hypothetical protein, helix-turn-helix and Zn ribbon transcriptional regulator   |
| Gmet_R3004                                                              | 5' of Gmet_0292                    | cytochrome <i>c</i> , 2 heme-binding sites                                                 |
| Gmet_R3005                                                              | 5' of Gmet_0970-<br>Gmet_0975      | transcriptional regulator, XRE family<br>five type IV pilus biogenesis proteins (Figure 8) |
| Gmet_R3006,<br>Gmet_R3007                                               | 5' of Gmet_1087                    | cytochrome <i>c</i> , 1 heme-binding site                                                  |
| Gmet_R3008,<br>Gmet_R3009                                               | 5' of Gmet_1191,<br>Gmet_1190      | cytochrome <i>c</i> , 1 heme-binding site<br>efflux pump outer membrane protein            |
| Gmet_R3010                                                              | 5' of Gmet_1195                    | serine protease, subtilase family                                                          |

|                                                                            |                                    |                                                                                                                                                                                                                       |
|----------------------------------------------------------------------------|------------------------------------|-----------------------------------------------------------------------------------------------------------------------------------------------------------------------------------------------------------------------|
| Gmet_R3011                                                                 | 5' of Gmet_1703                    | cytochrome <i>c</i> , 7 heme-binding sites                                                                                                                                                                            |
| Gmet_R3012                                                                 | 5' of Gmet_1763                    | conserved hypothetical protein related to Gmet_0131                                                                                                                                                                   |
| Gmet_R3013                                                                 | 5' of Gmet_2037                    | <i>N</i> -acylhomoserine lactone synthetase-related protein                                                                                                                                                           |
| Gmet_R3014                                                                 | 5' of Gmet_2168                    | cytochrome <i>c</i> , 2 heme-binding sites                                                                                                                                                                            |
| Gmet_R3015,<br>Gmet_R3016                                                  | 5' of Gmet_3485-<br>Gmet_3487      | peptidoglycan-binding ErfK/YbiS/YcfS/YnhG family protein<br>lipoprotein, putative<br>ErfK/YbiS/YcfS/YnhG-related protein                                                                                              |
| <b>6 predicted short RNAs, group 4 (Figure S8b)</b>                        |                                    |                                                                                                                                                                                                                       |
| Gmet_R4001                                                                 | 3' of Gmet_0173<br>5' of Gmet_0174 | putative lipoprotein<br>conserved hypothetical protein                                                                                                                                                                |
| Gmet_R4002                                                                 | 3' of Gmet_0325<br>5' of Gmet_0326 | cytochrome <i>c</i> , 4 heme-binding sites<br>oxidoreductase, iron-sulfur cluster-binding subunit                                                                                                                     |
| Gmet_R4003                                                                 | 3' of Gmet_2082<br>5' of Gmet_2081 | <i>bamF</i> ; predicted benzoyl-CoA reductase electron transfer protein, selenocysteine-containing<br><i>bamG</i> ; predicted benzoyl-CoA reductase electron transfer protein, NADH dehydrogenase 24 kDa subunit-like |
| Gmet_R4004<br>(fragment)                                                   | 3' of Gmet_2836<br>5' of Gmet_2835 | conserved hypothetical protein<br>nitroreductase 3 family protein                                                                                                                                                     |
| Gmet_R4005                                                                 | 3' of Gmet_3388<br>3' of Gmet_3389 | conserved hypothetical protein<br>ribonuclease D, putative                                                                                                                                                            |
| Gmet_R4006                                                                 | 3' of Gmet_3420<br>5' of Gmet_3419 | <i>recR</i> ; recombination protein RecR<br>pyruvate:ferredoxin/flavodoxin oxidoreductase                                                                                                                             |
| <b>8 copies of a palindromic nucleotide sequence, group 5 (Figure S8c)</b> |                                    |                                                                                                                                                                                                                       |
| Gmet_R5001                                                                 | within Gmet_0309                   | succinate dehydrogenase/fumarate reductase iron-sulfur protein                                                                                                                                                        |
| Gmet_R5002                                                                 | 3' of Gmet_0745<br>5' of Gmet_0746 | <i>ruvA</i> ; Holliday junction resolution DNA helicase RuvA<br><i>ruvB</i> ; Holliday junction resolution DNA helicase RuvB                                                                                          |
| Gmet_R5003                                                                 | 3' of Gmet_1067<br>5' of Gmet_1068 | CRISPR-associated TM1801 family protein<br>transposase, IS <i>Gme16</i>                                                                                                                                               |
| Gmet_R5004                                                                 | within Gmet_1068                   | CRISPR-associated integrase, IS <i>Gme16</i>                                                                                                                                                                          |
| Gmet_R5005                                                                 | 5' of Gmet_1069<br>5' of Gmet_1070 | transposase, IS <i>Gme2</i><br>RecB family exonuclease Cas4                                                                                                                                                           |
| Gmet_R5006                                                                 | 3' of Gmet_1154<br>3' of Gmet_1155 | membrane protein<br>membrane protein, TerC family                                                                                                                                                                     |
| Gmet_R5007                                                                 | 3' of Gmet_2410<br>5' of Gmet_2409 | superoxide dismutase, iron/manganese-containing<br>intracellular protease, PfpI family, putative                                                                                                                      |
| Gmet_R5008                                                                 | 3' of Gmet_3127<br>5' of Gmet_3126 | efflux pump inner membrane protein<br>conserved hypothetical protein                                                                                                                                                  |
| <b>4 RNA elements with complementary ends, group 6 (Figure S8d)</b>        |                                    |                                                                                                                                                                                                                       |
| Gmet_R6001                                                                 | 3' of Gmet_0475<br>5' of Gmet_0476 | <i>cbiO-1</i> ; cobalt ABC transporter, ATP-binding protein                                                                                                                                                           |

|                                                     |                                     |                                                                                                                                                                          |
|-----------------------------------------------------|-------------------------------------|--------------------------------------------------------------------------------------------------------------------------------------------------------------------------|
|                                                     |                                     | <i>cbiX</i> ; sirohdrochlorin cobaltochelataase                                                                                                                          |
| Gmet_R6002                                          | 3' of Gmet_0743<br>5' of Gmet_0744  | conserved hypothetical protein TIGR01033<br><i>ruvC</i> ; crossover junction endodeoxyribonuclease<br>RuvC                                                               |
| Gmet_R6003                                          | 3' of Gmet_1717<br>5' of Gmet_1716  | 3-hydroxyacyl-CoA dehydrogenase<br>enoyl-CoA hydratase/isomerase                                                                                                         |
| Gmet_R6004                                          | 3' of Gmet_3426<br>5' of Gmet_3427  | <i>hdrA</i> ; heterodisulfide reductase, subunit A<br>heterodisulfide reductase subunit                                                                                  |
| <b>7 predicted short RNAs, group 7 (Figure S8e)</b> |                                     |                                                                                                                                                                          |
| Gmet_R7001                                          | 3' of Gmet_0870<br>5' of Gmet_0871  | <i>cysE</i> ; serine <i>O</i> -acetyltransferase<br>Rrf2 family transcriptional regulator                                                                                |
| Gmet_R7002                                          | 3' of Gmet_1210<br>5' of Gmet_1211  | <i>mauG</i> ; methylamine utilization cytochrome <i>c</i><br>peroxidase MauG, 2 heme-binding sites<br><i>gap-2</i> ; glyceraldehyde-3-phosphate dehydrogenase,<br>type I |
| Gmet_R7003                                          | 3' of Gmet_2110<br>3' of Gmet_2112  | protein of unknown function UPF0261<br>predicted phosphohydrolase                                                                                                        |
| Gmet_R7004                                          | 3' of Gmet_2154<br>5' of Gmet_2153  | multicopper oxidase, type 2<br><i>bamO</i> ; electron transfer flavoprotein, beta subunit                                                                                |
| Gmet_R7005                                          | 3' of Gmet_2166<br>5' of Gmet_R3014 | transposase, IS <i>Gme5</i><br>conserved nucleotide sequence                                                                                                             |
| Gmet_R7006                                          | 3' of Gmet_2442<br>5' of Gmet_2441  | iron/manganese-dependent transcriptional regulator<br><i>cbiM-2</i> ; cobalt ABC transporter membrane protein<br>CbiM                                                    |
| Gmet_R7007                                          | 5' of Gmet_2718<br>5' of Gmet_2719  | protein of unknown function DUF323<br>conserved hypothetical protein                                                                                                     |
| <b>4 predicted short RNAs, group 8 (Figure S8f)</b> |                                     |                                                                                                                                                                          |
| Gmet_R8001<br>Gmet_R8002                            | 3' of Gmet_1317<br>5' of Gmet_1320  | protein of unknown function DUF86<br>nucleotidyltransferase-related protein                                                                                              |
| Gmet_R8003                                          | 3' of Gmet_1320<br>5' of Gmet_1321  | nucleotidyltransferase-related protein<br>conserved hypothetical protein                                                                                                 |
| Gmet_R8004                                          | 3' of Gmet_1322<br>5' of Gmet_1324  | periplasmic or secreted lipoprotein<br>conserved hypothetical protein (LbetaH<br>repeats_WxcM)                                                                           |
| <b>4 predicted short RNAs, group 9 (Figure S8g)</b> |                                     |                                                                                                                                                                          |
| Gmet_R9001                                          | 3' of Gmet_2486<br>5' of Gmet_2485  | hypothetical protein<br>conserved hypothetical protein                                                                                                                   |
| Gmet_R9002                                          | 3' of Gmet_2490<br>5' of Gmet_R0119 | conserved hypothetical protein<br>conserved nucleotide sequence                                                                                                          |
| Gmet_R9003                                          | 3' of Gmet_2491<br>5' of Gmet_2490  | transcriptional regulator, frameshifted<br>conserved hypothetical protein                                                                                                |
| Gmet_R9004                                          | 3' of Gmet_2534<br>3' of Gmet_2535  | transcriptional regulator, putative<br>hypothetical protein                                                                                                              |
| <b>2 predicted short RNAs (Figure S8h)</b>          |                                     |                                                                                                                                                                          |
| Gmet_R0064                                          | 3' of Gmet_0141                     | conserved hypothetical protein related to cytochrome                                                                                                                     |

|                                                       |                                    |                                                                                                                     |
|-------------------------------------------------------|------------------------------------|---------------------------------------------------------------------------------------------------------------------|
|                                                       | 5' of Gmet_0140                    | <i>c</i> assembly proteins<br>conserved hypothetical protein                                                        |
| Gmet_R0066                                            | 3' of Gmet_0257<br>3' of Gmet_0258 | membrane protein, putative<br>tRNA dihydrouridine synthase-like flavin<br>mononucleotide-binding domain protein     |
| <b>2 predicted short RNAs (Figure S8i)</b>            |                                    |                                                                                                                     |
| Gmet_R0068                                            | near Gmet_R0067<br>3' of Gmet_0312 | conserved nucleotide sequence<br>hypothetical protein                                                               |
| Gmet_R0094                                            | 3' of Gmet_1608<br>5' of Gmet_1609 | <i>hup-2</i> ; histone-like protein<br>LexA-ImpB/MucB/SamB protein pseudogene fusion                                |
| <b>2 predicted short RNAs (Figure S8j)</b>            |                                    |                                                                                                                     |
| Gmet_R0074                                            | 3' of Gmet_0717<br>5' of Gmet_0718 | hypothetical protein<br>hypothetical protein                                                                        |
| Gmet_R0075                                            | 3' of Gmet_0719<br>5' of Gmet_0720 | conserved hypothetical protein<br>conserved hypothetical protein                                                    |
| <b>2 conserved palindromic sequences (Figure S8k)</b> |                                    |                                                                                                                     |
| Gmet_R0091                                            | 3' of Gmet_1352<br>5' of Gmet_1353 | <i>glnA</i> ; glutamine synthetase, type I<br><i>ispG</i> ; 4-hydroxy-3-methylbut-2-en-1-yl diphosphate<br>synthase |
| Gmet_R0114                                            | 3' of Gmet_2372<br>5' of Gmet_2373 | <i>eno</i> ; enolase<br>nicotinate phosphoribosyltransferase                                                        |
| <b>2 predicted short RNAs (Figure S8l)</b>            |                                    |                                                                                                                     |
| Gmet_R0097                                            | 5' of Gmet_1702<br>near Gmet_R3011 | hypothetical protein<br>conserved nucleotide sequence                                                               |
| Gmet_R0099                                            | 3' of Gmet_1703<br>3' of Gmet_1704 | cytochrome <i>c</i> , 7 heme-binding sites<br>conserved hypothetical protein                                        |
| <b>3 predicted short RNAs (Figure S8m)</b>            |                                    |                                                                                                                     |
| Gmet_R0105                                            | 3' of Gmet_2004<br>5' of Gmet_2003 | glycosyl transferase<br>membrane protein, putative                                                                  |
| Gmet_R0106                                            | 3' of Gmet_2006<br>5' of Gmet_2005 | <i>sufS</i> ; selenocysteine lyase<br>polysaccharide deacetylase domain protein                                     |
| Gmet_R0107                                            | 3' of Gmet_2008<br>5' of Gmet_2007 | glycosyl transferase<br>coenzyme F390 synthetase superfamily protein                                                |
| <b>2 predicted short RNAs (Figure S8n)</b>            |                                    |                                                                                                                     |
| Gmet_R0110                                            | 3' of Gmet_2163<br>5' of Gmet_3609 | laccase family protein<br>conserved hypothetical protein                                                            |
| Gmet_R0111                                            | 3' of Gmet_2170<br>5' of Gmet_2169 | methyltransferase, putative<br>glycosyl transferase, putative                                                       |
| <b>2 predicted short RNAs (Figure S8o)</b>            |                                    |                                                                                                                     |
| Gmet_R0126                                            | 3' of Gmet_2725<br>5' of Gmet_2724 | hypothetical protein<br>ATP-dependent helicase, UvrD superfamily                                                    |
| Gmet_R0127                                            | 3' of Gmet_2726<br>5' of Gmet_3623 | neutral zinc metallopeptidase, putative<br>hypothetical protein                                                     |
| <b>2 predicted short RNAs (Figure S8p)</b>            |                                    |                                                                                                                     |
| Gmet_R0146                                            | 3' of Gmet_3471                    | pirin family protein, C-terminal fragment,                                                                          |

|            |                                     |                                                                           |
|------------|-------------------------------------|---------------------------------------------------------------------------|
|            | 3' of Gmet_3472                     | frameshifted<br>response regulator (REC)                                  |
| Gmet_R0147 | 5' of Gmet_3483<br>5' of Gmet_R0055 | type I restriction-modification enzyme S subunit,<br>fragment<br>Asn tRNA |
