# Supplementary material for: The genome sequence of Geobacter metallireducens: features of metabolism, physiology and regulation common and dissimilar to Geobacter sulfurreducens
Source: PubMed Central journal article supplement (PMC2700814; doi:10.1186/1471-2180-9-109), 2009-05-27
Supplement: 1471-2180-9-109-S6.pdf [file 1471-2180-9-109-S6.pdf]

|           |     |         |         |   |   |   |   |   |   |   |   |   |   |   |   |   |   |   |   |   |   |   |   |   |   |   |   |   |   |   |   |   |   |   |   |   |   |   |   |   |   |   |   |   |   |   |   |   |   |   |   |   |
|-----------|-----|---------|---------|---|---|---|---|---|---|---|---|---|---|---|---|---|---|---|---|---|---|---|---|---|---|---|---|---|---|---|---|---|---|---|---|---|---|---|---|---|---|---|---|---|---|---|---|---|---|---|---|---|
| Gmet_H401 | (-) | 412977  | 413021  | T | A | A | C | G | G | C | C | G | G | G | A | C | C | G | G | G | G | A | C | C | A | G | G | A | C | C | G | G | G | A | C | C | G | G | G | A | C | C | G | G | G | A | A | A | A | C | C | C |
| Gmet_H402 | (-) | 427750  | 427794  | A | A | A | A | C | T | A | A | G | G | G | A | C | C | G | G | G | G | A | C | C | A | G | G | A | C | C | G | G | G | A | C | C | A | A | C | A | A | T | G | G | C | A |   |   |   |   |   |   |
| Gmet_H403 | (-) | 460055  | 460099  | T | A | A | A | A | T | C | G | G | T | G | A | T | C | G | G | G | G | A | C | C | A | G | G | A | C | C | A | G | G | A | C | C | G | G | C | A | A | A | A | A | C | A |   |   |   |   |   |   |
| Gmet_H404 | (+) | 480226  | 480270  | T | A | A | C | G | G | C | C | G | G | G | A | C | T | A | G | G | G | A | C | C | G | G | G | A | C | C | A | G | G | A | C | C | A | G | G | A | A | A | A | C | C | A |   |   |   |   |   |   |
| Gmet_H405 | (+) | 481398  | 481442  | T | A | G | A | G | G | C | C | G | G | A | A | C | C | T | G | G | G | A | T | C | G | G | G | A | C | C | A | G | G | A | C | C | A | G | G | A | A | A | G | G | C | A |   |   |   |   |   |   |
| Gmet_H406 | (-) | 481439  | 481483  | A | A | C | A | G | A | C | C | G | G | G | A | C | C | A | G | G | G | A | C | C | G | G | G | A | T | C | C | G | G | G | A | C | C | G | G | T | A | A | T | G | C | C |   |   |   |   |   |   |
| Gmet_H407 | (+) | 515413  | 515457  | A | A | A | A | G | G | C | C | G | G | G | A | C | C | A | G | T | A | A | C | C | G | G | G | A | C | C | A | G | G | A | C | T | G | G | G | A | A | A | A | C | C | T |   |   |   |   |   |   |
| Gmet_H408 | (-) | 515519  | 515563  | A | A | A | A | G | G | C | G | G | G | G | A | C | T | G | G | G | G | A | C | C | G | G | G | A | C | C | G | G | G | A | C | C | G | G | T | A | A | A | A | A | A | C |   |   |   |   |   |   |
| Gmet_H409 | (+) | 524206  | 524250  | T | A | C | A | T | G | C | C | G | G | G | A | T | C | G | G | G | A | C | C | G | G | G | A | C | C | G | G | G | A | C | C | G | G | G | A | A | A | A | C | C | T |   |   |   |   |   |   |   |
| Gmet_H410 | (-) | 524445  | 524489  | G | T | T | G | T | A | C | C | G | G | G | A | C | C | A | G | G | G | C | C | G | G | G | A | C | C | G | G | G | A | C | C | G | G | G | A | A | C | C | C | A | A |   |   |   |   |   |   |   |
| Gmet_H411 | (+) | 530025  | 530069  | A | A | A | A | G | G | C | C | G | G | G | A | C | C | G | G | G | A | C | C | A | G | G | A | C | C | A | G | G | A | C | C | A | G | G | A | A | A | A | A | A | C |   |   |   |   |   |   |   |
| Gmet_H412 | (-) | 530117  | 530161  | C | A | A | A | G | A | C | C | G | G | G | A | C | C | G | G | G | A | C | C | A | G | G | A | C | C | G | G | G | A | C | C | G | G | G | A | A | T | T | C | A | A |   |   |   |   |   |   |   |
| Gmet_H413 | (+) | 530867  | 530911  | G | A | A | A | A | A | C | G | G | G | G | A | T | C | G | G | G | A | C | C | G | G | G | A | C | C | G | G | G | A | C | C | G | G | G | G | A | A | A | A | A | G |   |   |   |   |   |   |   |
| Gmet_H414 | (+) | 581560  | 581604  | G | A | A | A | G | G | C | C | G | G | G | A | C | C | A | G | G | G | A | C | C | G | G | G | A | C | C | G | G | G | A | C | C | A | G | G | A | A | A | A | A | C | A |   |   |   |   |   |   |
| Gmet_H415 | (-) | 581664  | 581708  | A | A | A | A | T | T | C | G | G | G | G | A | C | C | C | G | G | G | A | C | C | G | G | G | A | C | C | G | G | G | A | C | C | G | G | T | A | A | A | A | A | C | A |   |   |   |   |   |   |
| Gmet_H416 | (+) | 766602  | 766646  | T | G | A | A | G | G | C | G | G | G | G | A | C | C | A | G | G | G | A | T | C | G | G | G | A | C | C | G | G | G | A | C | C | G | G | T | A | A | A | G | G | C | T |   |   |   |   |   |   |
| Gmet_H417 | (+) | 787460  | 787504  | C | G | C | G | A | T | C | G | G | G | G | A | C | C | G | G | G | A | C | C | G | G | G | A | C | C | A | G | G | G | C | C | G | G | G | A | A | A | A | C | C | C |   |   |   |   |   |   |   |
| Gmet_H418 | (+) | 795833  | 795877  | T | A | A | A | A | T | C | C | G | G | G | A | C | C | G | G | G | A | T | C | G | G | G | A | C | C | A | G | G | A | C | C | G | G | C | A | A | A | A | A | A | G |   |   |   |   |   |   |   |
| Gmet_H419 | (+) | 998562  | 998606  | T | A | A | A | G | A | C | A | G | G | G | A | C | C | A | G | G | A | C | C | A | G | A | A | C | C | G | G | G | A | C | C | G | G | C | A | A | A | A | C | C | C |   |   |   |   |   |   |   |
| Gmet_H420 | (-) | 998630  | 998674  | G | A | A | A | A | G | C | C | G | G | G | A | C | C | G | G | G | A | T | C | G | G | G | A | C | C | A | G | G | A | C | C | A | G | G | A | A | A | G | G | C | G |   |   |   |   |   |   |   |
| Gmet_H421 | (-) | 1968053 | 1968097 | T | G | A | C | A | T | C | C | G | G | G | A | C | C | A | G | G | A | C | C | G | G | G | A | G | C | G | G | G | A | C | C | T | G | T | T | A | C | C | C | C | C |   |   |   |   |   |   |   |
| Gmet_H422 | (+) | 2635345 | 2635389 | T | A | A | C | C | C | C | G | G | G | G | A | C | C | A | G | G | A | C | C | G | G | G | A | C | C | G | G | G | A | C | C | A | G | T | G | A | A | A | T | C | C |   |   |   |   |   |   |   |
| Gmet_H423 | (-) | 2655831 | 2655875 | T | A | G | A | G | G | C | C | G | G | G | A | C | C | G | G | G | A | C | C | A | G | G | A | C | C | A | G | G | A | C | C | G | G | C | G | G | C | A | G | C | G |   |   |   |   |   |   |   |
| Gmet_H424 | (+) | 2888448 | 2888492 | C | G | G | A | A | T | C | C | G | G | G | A | C | C | G | G | G | A | C | C | G | G | G | A | C | C | G | G | G | A | C | C | G | G | G | A | A | A | T | C | T |   |   |   |   |   |   |   |   |
| Gmet_H425 | (+) | 2909777 | 2909821 | T | T | A | A | T | T | C | A | G | T | A | A | C | C | A | G | G | A | C | C | A | G | A | A | C | C | G | G | G | A | C | C | A | G | T | G | G | A | A | T | C | A |   |   |   |   |   |   |   |
| Gmet_H426 | (-) | 2909837 | 2909881 | A | A | A | C | C | T | C | G | G | A | A | A | T | C | C | G | G | A | C | C | G | G | G | A | C | C | G | G | G | A | C | C | G | G | T | A | A | A | A | C | C | G |   |   |   |   |   |   |   |
| Gmet_H427 | (+) | 2911326 | 2911370 | T | G | A | A | A | G | C | C | G | G | G | A | C | C | G | G | G | A | T | C | A | G | G | A | C | C | G | G | G | A | T | C | A | G | G | A | A | A | A | A | T | C |   |   |   |   |   |   |   |
| Gmet_H428 | (-) | 2911421 | 2911465 | C | G | G | A | A | T | T | C | G | G | G | A | C | C | G | G | G | A | C | C | G | G | G | A | C | C | A | G | G | A | C | C | G | G | G | A | A | A | A | C | C | C |   |   |   |   |   |   |   |
| Gmet_H429 | (-) | 3124287 | 3124331 | T | G | A | A | G | G | C | G | G | G | G | A | C | C | A | G | G | A | C | C | G | G | G | A | C | C | G | G | G | A | C | C | G | G | G | A | A | A | A | G | C | A |   |   |   |   |   |   |   |
| Gmet_H430 | (+) | 3126262 | 3126306 | C | T | G | C | C | G | C | G | G | G | G | A | C | C | G | G | G | A | C | C | G | G | G | A | C | C | G | G | G | A | C | C | G | G | C | T | C | A | A | A | A | G |   |   |   |   |   |   |   |
| Gmet_H431 | (-) | 3126379 | 3126423 | T | G | A | C | A | G | C | C | G | G | G | A | C | G | G | G | G | A | C | C | G | G | G | A | C | C | G | G | G | A | C | C | G | G | G | A | A | A | G | G | C | G |   |   |   |   |   |   |   |
| Gmet_H432 | (-) | 3126559 | 3126603 | T | A | G | A | A | G | C | C | G | G | G | A | C | C | G | G | G | A | C | C | G | G | G | A | C | C | G | G | G | A | C | C | G | G | G | A | A | A | G | G | C | A |   |   |   |   |   |   |   |
| Gmet_H433 | (+) | 3141389 | 3141433 | G | C | G | A | T | A | C | C | G | G | T | A | C | C | G | G | G | A | C | C | G | G | G | A | C | C | G | G | G | A | C | C | A | G | T | A | A | A | A | A | C | C |   |   |   |   |   |   |   |
| Gmet_H434 | (+) | 3188778 | 3188822 | A | A | G | T | C | C | C | C | G | G | G | A | C | C | G | G | G | A | C | C | A | G | G | A | C | C | G | G | G | A | C | C | G | G | C | A | A | A | G | G | C |   |   |   |   |   |   |   |   |
| Gmet_H435 | (-) | 3188884 | 3188928 | C | A | A | G | G | G | C | C | G | G | G | A | C | C | G | G | G | A | C | C | G | G | G | A | C | C | A | G | T | T | T | A | G | A | A | A | G | C | C | A | A | C | C |   |   |   |   |   |   |
| Gmet_H436 | (+) | 3272024 | 3272068 | G | C | G | T | C | C | T | C | G | G | G | A | C | C | G | G | G | A | C | C | G | G | G | A | C | C | G | G | G | A | C | C | G | G | G | A | A | A | A | A | A | C |   |   |   |   |   |   |   |
| Gmet_H437 | (-) | 3272462 | 3272506 | C | A | A | C | G | T | A | G | G | G | G | A | C | C | G | G | G | A | C | C | G | G | G | A | C | C | G | G | G | A | C | C | G | G | G | A | A | A | A | T | C | G |   |   |   |   |   |   |   |
| Gmet_H438 | (-) | 3280694 | 3280738 | G | T | G | A | G | G | C | C | G | G | G | A | C | T | G | G | G | A | T | T | G | G | G | A | C | C | A | G | G | A | C | C | G | G | G | A | A | A | G | C | C | A |   |   |   |   |   |   |   |
| Gmet_H439 | (+) | 3289968 | 3290012 | T | A | A | A | G | A | C | G | G | G | G | A | C | C | A | G | G | A | C | C | G | G | G | A | C | C | G | G | G | A | C | C | G | G | G | A | A | C | G | C | C | A |   |   |   |   |   |   |   |
| Gmet_H440 | (+) | 3294421 | 3294465 | T | G | A | A | G | T | C | G | G | G | G | A | C | C | A | G | G | A | C | C | G | G | G | A | C | C | G | G | G | A | C | C | G | G | T | A | A | T | A | C | C | G |   |   |   |   |   |   |   |
| Gmet_H441 | (-) | 3373657 | 3373701 | T | G | A | A | T | C | T | G | G | G | G | A | C | C | G | G | G | A | C | C | A | G | G | A | C | C | A | G | G | A | C | C | G | G | G | A | A | A | A | C | C | G |   |   |   |   |   |   |   |
| Gmet_H442 | (+) | 3496734 | 3496778 | A | T | A | A | G | T | C | A | G | G | G | A | C | C | G | G | G | A | C | C | G | G | G | A | C | C | G | G | G | A | C | C | A | G | T | A | A | C | A | A | C | T |   |   |   |   |   |   |   |
| Gmet_H443 | (+) | 3497091 | 3497135 | A | A | A | C | C | T | C | C | G | G | G | A | T | C | G | G | G | A | C | C | G | G | G | A | T | C | G | G | G | A | C | C | G | G | G | A | A | A | G | G | C | T |   |   |   |   |   |   |   |
| Gmet_H444 | (+) | 3553644 | 3553688 | G | A | G | A | A | G | C | C | G | G | G | A | C | C | G | G | G | A | C | C | A | G | G | A | C | C | G | G | G | A | C | C | A | G | G | A | A | A | A | G | A | C |   |   |   |   |   |   |   |
| Gmet_H445 | (-) | 3555274 | 3555318 | T | C | C | A | T | T | G | A | A | A | C | C | T | C | C | G | G | A | C | C | G | G | G | A | C | C | G | G | G | A | C | C | G | G | G | A | A | A | A | C | C | C |   |   |   |   |   |   |   |
| Gmet_H446 | (-) | 3806153 | 3806197 | T | A | A | A | G | G | C | C | G | G | G | A | C | C | G | G | G | A | T | T | A | G | G | A | C | C | G | G | T | G | A | C | C | A | G | C | A | A | C | T | G | A | T |   |   |   |   |   |   |
| Gmet_H447 | (+) | 3850973 | 3851017 | C | C | G | C | G | A | T | C | G | G | G | A | C | C | A | G | G | A | C | C | A | G | G | A | C | C | A | G | G | A | C | C | G | G | C | A | A | A | G | A | C | T |   |   |   |   |   |   |   |
| Gmet_H448 | (-) | 3851057 | 3851101 | T | A | A | A | A | T | C | G | G | T | G | A | T | T | G | G | G | A | C | C | G | G | G | A | C | C | G | G | G | A | C | C | A | G | T | A | A | A | A | A | T | C |   |   |   |   |   |   |   |
| Gmet_H449 | (+) | 3984830 | 3984874 | A | T | T | A | G | A | C | A | G | G | A | A | A | C |   |   |   |   |   |   |   |   |   |   |   |   |   |   |   |   |   |   |   |   |   |   |   |   |   |   |   |   |   |   |   |   |   |   |   |
