# Supplementary material for: The genome sequence of Geobacter metallireducens: features of metabolism, physiology and regulation common and dissimilar to Geobacter sulfurreducens
Source: PubMed Central journal article supplement (PMC2700814; doi:10.1186/1471-2180-9-109), 2009-05-27
Supplement: 1471-2180-9-109-S7.pdf [file 1471-2180-9-109-S7.pdf]

|            |     |         |                                                                                                                                                                     |        |
|------------|-----|---------|---------------------------------------------------------------------------------------------------------------------------------------------------------------------|--------|
| Gmet_I101A | (-) | 10804   | - - - T G C A A T C A A T T A A A A T T T C A G G G T T T G T T T C T C A G A T T T T A C T C C G T - T G C T C T G T T G C T C A G T G T T T C A A                 |        |
| Gmet_I101B | (+) | 10943   | - - - T T A G T A G G G A A C A G G C A G G A T G T T T C G A A A A G G G T G T T T T C T C A G T - T G C T C A G T T G C T C A G T T G C T C A G                   | ISGme9 |
| Gmet_I102A | (-) | 59246   | - - - - - A T C A A A C G G A T T T A A A T G G A T T T C T C G T C G G A T C T T A C T C A G T - T G C T C C G T T G C T T G T A T G T T T C A                     | ISGme8 |
| Gmet_I102B | (+) | 59380   | - - - - - A G C G C C C T G C C G G T T A G G A G G A G T T T C G G A C T A A G G C A T T G A - T T C T C G T T G C T T G T A T G T T T C A                         | ISGme8 |
| Gmet_I103A | (-) | 118192  | - - - - - - - - - A G T C A G G C T G G A T T T C G A A T T A C C C T T C T G A T C T C T C T G T - T G C T C A G T T G C T C T G T G T T A T T T                   | ISGme9 |
| Gmet_I103B | (+) | 118318  | - - - - - - - - - C T A C A A A T A G A A G C G T T A T T T G A C T C A G A T T G T T C T C C G T - T G C T C A G T T G C T T G T A T G T T T C A                   | ISGme8 |
| Gmet_I104A | (-) | 158966  | - - - - - G G A A A G T T T T G C A T C A A A T T G A A T T A A C G G G T T G A T T C C T C T G T - T G C T C A G T T G C T C T G T G T T A T T C                   |        |
| Gmet_I104B | (+) | 159101  | - - - - - C G G G T G T G T T C A G A A A C A G T T T T A A T A G G A A T T T G T C T C A G A A T T - T G C T C A G T T G C T T G T A T G T T T C A                 | ISGme8 |
| Gmet_I105A | (-) | 209230  | - - - - - C C G T T G T T G A G A A C A T A A A A A A A T T C T T T C T C A G G T T T T A C T C C G T - T G C T C T G T T G C T T G T A T G T T T C A               |        |
| Gmet_I105B | (+) | 209367  | - - - - - C A C C C G C A T T G A T T G A T G A T T T T G C C T G G A G G T T T T G A T T C T C T G T - T G C T C T G T T G C T C A G T G T T A T T T               |        |
| Gmet_I106A | (-) | 534993  | - - - - - - - - - T A T T G C T C A G G T T A T T G C A T T C T C A A A G A T T T T C T C A G T - T G C T C A G T T G C T T G T A T G T T T C A                     | ISGme8 |
| Gmet_I106B | (+) | 535118  | - - - - - - - - - G T T A C A G T A C C C G T T G T G C T T T G A C G A G T T G C T T T C T C T G T - T G C T C T G T T G C T C T G T T A T T A                     |        |
| Gmet_I107A | (-) | 727249  | - - - - - - - - - - - - - - - - - - - - - - - - - T G T G T T T T A A A C T T A C T C A G T - T G C T C A G T T G C T T G T G T T T C A A T                         |        |
| Gmet_I107B | (+) | 727337  | - - - - - - - - - - - - - - - - - - - - - - - - - A T A A A T T T T T G C T T T T C T C T G T - T G C T C A G T T G C T C T G T G T T G A A A                       |        |
| Gmet_I108A | (-) | 736595  | - - - - - - - - - - - - - - - - - - - - - - - - - G T C T A A A T T C A G T T A T T G A G G T T T T C T C C G T - T G C T C T G T C G C T C T G T G T T A T T A     |        |
| Gmet_I108B | (+) | 736702  | - - - - - - - - - - - - - - - - - - - - - - - - - G T C T T C A G G A G G A A A T T G C G T T T T T C T C T G T - T G C T C A G T T G C T T G T A T G T T T C A     | ISGme8 |
| Gmet_I109A | (-) | 796477  | - - - - - A T A T T C C T G C C T G A T A G C C C T T T T T T C T G C T T T T G A T T T C T C C G T G T G C T C C G T T G C T C C G T G T T A T T C                 |        |
| Gmet_I109B | (-) | 796612  | - - - - - G A G C T G G T T G C T T G T G C A G G T T A A C G C T C T T G T T T T A C T C C G T - T G C T C A G T T G C T T G T A T G T T T C A                     | ISGme8 |
| Gmet_I110A | (-) | 892534  | - - T T G G G T A T T G A G G T T A A A T T G T G C C G C G A A A T C C G A T T T T C C C T C T G T - T G C T C A G T T G C T T G T A T G T T T A T T T             |        |
| Gmet_I110B | (+) | 892674  | - - - C A G C G G T C G C C G A G T C C T A G C G G T T C C A C G T C G A A G C C T T T C T C T G T - T G C T C A G T T G C T C T G T G T T T C A A                 |        |
| Gmet_I111A | (-) | 984276  | - - - - - - - - - T C T C T G C A A T A A C T G T T A A A G G T T T T G C G G G T T T T C T C A G T - T G C T C A G T T G C T C T G T G T T A T T C                 |        |
| Gmet_I111B | (+) | 984402  | - - - - - - - - - G G T T C T C A C A A G T T A A G G C A A A A A G A A T T T C T T T G C T C T G T - T G C T C A G T T G C T C T G T G T T T C G G                 |        |
| Gmet_I112A | (-) | 1068371 | - T G G T T G A A G A C T G G A A T G T T A A A G G G T T T T C C C T C A G A T T T T A C T C C G T - T G C T C A G T T G C T T G T A T G T T T C A                 | ISGme8 |
| Gmet_I112B | (+) | 1068513 | - - C A T A C A G A A G A T C T G G C A A A T T A T T G G G T T A A G C A T T G A C A T C T C C G T - T G C T C C G T T G C T C C G T G T T A T T A                 |        |
| Gmet_I113A | (-) | 1265540 | - - - - - - - - - - - - - - - - - - - - - - - - - C A T A A A T A A C A G G T T G C T T T T C T C C G T - T G C T C C G T T G C T C C G T G T T A T T A             |        |
| Gmet_I113B | (+) | 1265641 | - - - - - - - - - - - - - - - - - - - - - - - - - T T G A A A A T C T T T T T G C A G T T C T C C G T G T G T C T C G T T G C T T G T A T G T T T C A               | ISGme8 |
| Gmet_I114A | (-) | 1931000 | - - - - - - - - - - - - - - - - - - - - - - - - - C C C T G G C T T C C T G G T T T A T C T C T G T - T G C T C T G T T G C T C A G T G T T A T T C                 |        |
| Gmet_I114B | (+) | 1931095 | - - - - - - - - - - - - - - - - - - - - - - - - - A T G G A A G T C T T T T G C C T T T C T C T G T - T G A T C A G T T G C T T G T A T G T T T C A                 | ISGme8 |
| Gmet_I115A | (-) | 2325783 | - - - - - - - - - - - - - - - - - - - - - - - - - T T A T C G A T T T C T C T G T - T G C T C C G T T G C T C A G T G T C A T A C                                   |        |
| Gmet_I115B | (+) | 2325860 | - - - - - - - - - - - - - - - - - - - - - - - - - A A T T A T G C T T G G A T T T - T G C T C A G T T G C T C A G T G T T T C A A                                   |        |
| Gmet_I116A | (-) | 2331965 | - - - - - - - - - - - - - - - - - - - - - - - - - T G A T T G A A A T C C T G C T T T C T C A T T - T G C T C A G T T G C T C A G T G T T A T T C                   |        |
| Gmet_I116B | (+) | 2332058 | - - - - - - - - - - - - - - - - - - - - - - - - - A A T A G A G T T G T T T G T C T T T C T C C A T - T G C T C A G T T G C T T G T A T G T T T C A                 | ISGme8 |
| Gmet_I117A | (-) | 2836474 | - - - - - T C T A T T G A T A G G A T C A G G C G T T A T A A T T C A T T G T T T T C T C T G T - T G C T C A G T T G C T C T G T G T T A T T C                     |        |
| Gmet_I117B | (+) | 2836609 | - - - - - A G C A G A A G C A T C C T C G T T T A T T T G T T T T C T A G G T T T T A C T C A G T - T G C T C A G T T G C T T G T A T G T T T C A                   |        |
| Gmet_I118A | (-) | 2857971 | A A G A G T G G C A T T T A C A G G G C G C T C G A G A A T A A A T T G A G G A T T T T C T C C G T - T G C T C C G T T G C T C T G T G T T A T T T                 |        |
| Gmet_I118B | (+) | 2858115 | - C C C G G T A T C A T C A A A G C G T T G G T C A G T C A T G A A A T G C C T G T C C C T C C G T - T A C T C C G T T G C T C C T C A C C C G G C                 |        |
| Gmet_I119A | (-) | 3148083 | - - G C G T A T T A C C C G G A T T T C G A C G G A A T T C C C C T C T A G A T T T T A C T C C G T - T G C T C A G T T G C T C A G T G T T T C A A                 |        |
| Gmet_I119B | (+) | 3148223 | - - - G T A A C A G G G T C A A G C A G A A T C C A T A G C T A G C C A A C T G A T T T C T C A G T - T G C T C C G T T G C T C A G T G T T A T T A                 |        |
| Gmet_I120A | (-) | 3175791 | - - - - - - - - - - - - - - - - - - - - - - - - - T C A G C G G A C A T T G A G T T T T T T G T T T T T C T C C G T G T G C T C C G T T G C T C C G T G T T A T T C |        |
| Gmet_I120B | (+) | 3175904 | - - - - - - - - - - - - - - - - - - - - - - - - - T T T T C A A T A A T C A A T T C T C A G A T T T T T C T C C G T - T G C T C A G T T G C T T G T A T G T T T C A | ISGme8 |
| Gmet_I121A | (-) | 3363871 | - - - - - T T T G T T A G G C T C T T T C A G A A A C A A G A A T T T G T C T T T T C T C A G T - T G C T C A G T T G C T T G T A T G T T T C A                     | ISGme8 |
| Gmet_I121B | (+) | 3364004 | - - - - - C G A T T G T C A A G G G T G T G A C C T T C A G C C A T C G A G T T T A C T C T G T - T G C T C A G T T G C T C T G T G T T A T T A                     |        |
| Gmet_I122A | (-) | 3650464 | - - - - - - - - - - - - - - - - - - - - - - - - - T C A A A G A A C T T G T C T T G T G A T T T T C A A C T C T G T - T G C T C A G T T G C T C T G T G T T A T T T |        |
| Gmet_I122B | (+) | 3650574 | - - - - - - - - - - - - - - - - - - - - - - - - - A C G T T T T G T A T T T T A G C T T T T G A T T T C T C A G T - T G C T C T G T T G C T C T G T G T T A T T C   |        |
| Gmet_I123A | (-) | 3743202 | - - - - - - - - - - - - - - - - - - - - - - - - - C C T T T C A G A C T G T T T T T G A T A A A - T T C T C A G T T G C T C T G T G T T A T T C                     |        |
| Gmet_I123B | (+) | 3743293 | - - - - - - - - - - - - - - - - - - - - - - - - - T T T T T C C C A G A T T T T G C T C A G T - T G C T C T G T T G C T C A G T G T T T C G A                       |        |
| Gmet_I124A | (-) | 3848686 | - - - - - - - A T T T G C G A C C C G T T G T C T T T G T C A G T T T A T T C G G T T T T C T C C G T G T G C T C C G T T G T T C C G T G T T A T T C               |        |
| Gmet_I124B | (+) | 3848818 | - - - - - - - C A T T T C A G G T A C C C C T A A T G A T C G G G T T T A A G C C G T T C T C C G T - T G C T C C G T T G C T T G T A T G T T T C A                 | ISGme8 |
