# Supplementary material for: The genome sequence of Geobacter metallireducens: features of metabolism, physiology and regulation common and dissimilar to Geobacter sulfurreducens
Source: PubMed Central journal article supplement (PMC2700814; doi:10.1186/1471-2180-9-109), 2009-05-27
Supplement: 1471-2180-9-109-S9.pdf [file 1471-2180-9-109-S9.pdf]

|            |     |         |                                                                                                                                   |
|------------|-----|---------|-----------------------------------------------------------------------------------------------------------------------------------|
| Gmet_I301A | (-) | 338111  | - - - - - - - - - - A A T G G A G C C T G C C T T T C T C C T G A A T T C T G A A T T C T G A C T C C T G A A T T C T G T         |
| Gmet_I301B | (+) | 338212  | - - - - - - - - - - C C A T G C T G A C T A C T A T A T T C C G A C T T C T G A C T C C T T C A A G G A G A G G T T C A T         |
| Gmet_I302A | (-) | 529164  | - - - - - - - - - - - - - - - - - - - - - - T G C T T T T C T T C T G A A T T C T G G C T T C T G A A T T C T G G A T T C T T G   |
| Gmet_I302B | (+) | 529246  | - - - - - - - - - - - - - - - - - - - - - - C G G T C T T T T C A T G A - T G T C T A C T T C T G T A T T C T G A C T C C T G A   |
| Gmet_I303A | (-) | 1227156 | - - - - - - - - - - - - - - - - - - - - - - T T T A C C C A T T C T G A A T T C T G A C T C C T G G T T T C T G A A T T C T T C   |
| Gmet_I303B | (+) | 1227240 | - - - - - - - - - - - - - - - - - - - - - - C C G C C T G G C T T C T G A A T C C T G A A T T C T G A C T C C T G A C T C C T G G |
| Gmet_I304A | (-) | 3020822 | C T G A A C T T G T G T T C G A G T G G A C T T T C T C C T G A A T T C T G A C T C C T G A A T T C T G T A T T C T G A           |
| Gmet_I304B | (+) | 3020936 | - - - - - A A T G C T G T T G C G C G A A T T T C A T T C C G A C T T C T G C A T T C T G A C T C C T G A C T C C C G A           |
| Gmet_I305A | (-) | 3473501 | - - - - - - - - - - - - - - - - - - - - - - C C T G G T T T T T T C T G G C T C C T G A A T T C T G A C T C C T G A A T A C C C A |
| Gmet_I305B | (+) | 3473586 | - - - - - - - - - - - - - - - - - - - - - - C A T C T T C T A T T C T G A C T C C T G A C T C C T A A C T T C T G G A T T C T T G |
| Gmet_I306A | (-) | 3513611 | - - - - - - - - - - - - - - - - - - - - - - A T T G A A A A T T C T G G A T T C T G A A T T C T G A C T C C T G A C T T C T T T   |
| Gmet_I306B | (+) | 3513694 | - - - - - - - - - - - - - - - - - - - - - - G T C T T T C A T T C T G A C T G C T G A C T C C T G A C T T C T G A A T T C C A A   |
| Gmet_I307A | (-) | 3599790 | - - - - - - - - - - - - - - - - - - - - - - A A C T T A C T G G A T T C T G A A T T C T G A C T C C T G A A T T C T T T           |
| Gmet_I307B | (+) | 3599865 | - - - - - - - - - - - - - - - - - - - - - - T T T C T C C T G A A T T C T G A C T C C T G T C T C C T G A C T A C T C A           |
| Gmet_I308A | (-) | 3854576 | - - - - - - - - - - - - - - - - - - - - - - A G A A C G T G T T G C C T T T C T C C T G A A T T C T G A C T C C T T G             |
| Gmet_I308B | (+) | 3854647 | - - - - - - - - - - - - - - - - - - - - - - C C C T C T G C - T T C G C C A T C A A A C G G C C A G C C C C C T G A               |
