# Supplementary material for: The genome sequence of Geobacter metallireducens: features of metabolism, physiology and regulation common and dissimilar to Geobacter sulfurreducens
Source: PubMed Central journal article supplement (PMC2700814; doi:10.1186/1471-2180-9-109), 2009-05-27
Supplement: 1471-2180-9-109-S10.pdf [file 1471-2180-9-109-S10.pdf]

Table S5. Cytochrome *c* biogenesis gene clusters of *G. sulfurreducens* and *G. metallireducens*, and associated *c*-type cytochromes.

| <i>G. metallireducens</i><br>gene/feature | <i>G. sulfurreducens</i><br>gene/feature | Functional annotation                                          |
|-------------------------------------------|------------------------------------------|----------------------------------------------------------------|
| <b>Gene cluster #1</b>                    |                                          |                                                                |
| Gmet_3231                                 | GSU3282                                  | siroheme synthase N-terminal domain protein                    |
| Gmet_3232                                 | GSU3283                                  | ResC/HemX-like cytochrome <i>c</i> biogenesis membrane protein |
| Gmet_3233                                 | GSU3284                                  | <i>hemA</i> ; glutamyl-tRNA reductase                          |
| Gmet_3234                                 | GSU3285                                  | <i>hemC</i> ; porphobilinogen deaminase                        |
| Gmet_3235                                 | GSU3286                                  | uroporphyrinogen III synthase/methyltransferase                |
| Gmet_3236                                 | GSU3287                                  | <i>tatD</i> ; magnesium-dependent DNase TatD                   |
| Gmet_I216A                                | none                                     | integration host factor binding site, putative                 |
| Gmet_I216B                                | none                                     | integration host factor binding site, putative                 |
| Gmet_3237                                 | GSU3288                                  | YgdL family protein                                            |
| Gmet_3238                                 | GSU3289                                  | ferritin-like domain protein                                   |
| <b>Gene cluster #2</b>                    |                                          |                                                                |
| Gmet_2902                                 | GSU0612                                  | <i>ppcA</i> ; cytochrome <i>c</i> , 3 heme-binding sites       |
| Gmet_2901                                 | GSU0613                                  | ResB-like family protein (cytochrome <i>c</i> biogenesis)      |
| Gmet_2900                                 | GSU0614                                  | ResC/HemX-like cytochrome <i>c</i> biogenesis membrane protein |
| Gmet_2899                                 | GSU0615                                  | cytochrome <i>c</i> , 10-11 heme-binding sites                 |
| Gmet_2898                                 | GSU0616                                  | cytochrome <i>c</i> , 8 heme-binding sites                     |
| Gmet_H438                                 | none                                     | four heptanucleotide repeats                                   |
| Gmet_2897                                 | GSU0617                                  | NHL repeat domain protein                                      |
| none                                      | GSU0617.3                                | conserved nucleotide sequence                                  |
| none                                      | GSU0617.1                                | hypothetical protein                                           |
| Gmet_3625                                 | none                                     | hypothetical protein                                           |
| none                                      | GSU0617.2                                | hypothetical protein                                           |
| Gmet_3624                                 | none                                     | hypothetical protein                                           |
| Gmet_2896                                 | GSU0618                                  | <i>omcE</i> ; cytochrome <i>c</i> , 4 heme-binding sites       |
| <b>Gene cluster #3<sup>1</sup></b>        |                                          |                                                                |
| Gmet_0571                                 | GSU2899?<br>GSU0702?                     | cytochrome <i>c</i> , 26 heme-binding sites                    |
| Gmet_0572                                 | GSU2891?<br>GSU0704?<br>GSU2881.1?       | ResB-like family protein (cytochrome <i>c</i> biogenesis)      |
| Gmet_0573                                 | GSU2890?<br>GSU0705?<br>GSU2880?         | ResC/HemX-like cytochrome <i>c</i> biogenesis membrane protein |
| Gmet_0574                                 | GSU0703                                  | conserved hypothetical protein                                 |

|                        |                      |                                                                |
|------------------------|----------------------|----------------------------------------------------------------|
| Gmet_0575              | none                 | cytochrome <i>c</i> , 18 heme-binding sites                    |
| Gmet_0576              | none                 | cytochrome <i>c</i> , 13 heme-binding sites                    |
| Gmet_0577              | none                 | conserved hypothetical protein                                 |
| Gmet_0578              | none                 | ResB-like family protein (cytochrome <i>c</i> biogenesis)      |
| Gmet_0579              | none                 | ResC/HemX-like cytochrome <i>c</i> biogenesis membrane protein |
| Gmet_0580              | none                 | cytochrome <i>c</i> , 14 heme-binding sites                    |
| Gmet_0581              | GSU2898              | <i>omcN</i> ; cytochrome <i>c</i> , 27-34 heme-binding sites   |
| Gmet_3649              | GSU2897              | conserved hypothetical protein                                 |
| Gmet_0582              | GSU2896              | ankyrin-related protein                                        |
| none                   | GSU2895              | hypothetical protein                                           |
| Gmet_0583              | none                 | spermine/spermidine synthase-related protein                   |
| Gmet_0584              | none                 | conserved hypothetical protein                                 |
| Gmet_0585              | none                 | glycosyl transferase, family 9 (heptosyltransferase)           |
| Gmet_0586              | none                 | iron-sulfur oxidoreductase                                     |
| Gmet_0587              | none                 | radical SAM iron-sulfur oxidoreductase                         |
| Gmet_0588              | none                 | conserved hypothetical protein                                 |
| Gmet_0589              | none                 | glycosyl transferase, family 2                                 |
| Gmet_0590              | none                 | conserved hypothetical protein                                 |
| Gmet_0591              | none                 | conserved hypothetical protein                                 |
| none                   | GSU2893.1            | hypothetical protein                                           |
| Gmet_0595 (rearranged) | GSU2893              | acyl-protein synthetase                                        |
| none                   | GSU2892              | hypothetical protein                                           |
| Gmet_0592              | GSU2891              | ResB-like family protein (cytochrome <i>c</i> biogenesis)      |
| Gmet_0593              | GSU0703              | conserved hypothetical protein                                 |
| Gmet_0594              | GSU2890              | ResC/HemX-like cytochrome <i>c</i> biogenesis membrane protein |
| Gmet_0595              | GSU2893 (rearranged) | acyl-protein synthetase                                        |
| Gmet_0596              | GSU2889              | conserved hypothetical protein                                 |
| Gmet_0597              | GSU2888              | radical SAM iron-sulfur oxidoreductase                         |
| none                   | GSU2887.1            | hypothetical protein                                           |
| none                   | GSU2887              | cytochrome <i>c</i> , 27 heme-binding sites                    |
| Gmet_0598              | none                 | cytochrome <i>c</i> , 23 heme-binding sites                    |
| Gmet_3587              | GSU2886.1            | cytochrome <i>c</i> , 7 heme-binding sites                     |
| none                   | GSU2885.2            | conserved nucleotide sequence (Gmet_R3### family)              |
| none                   | GSU2885.1            | conserved nucleotide sequence (Gmet_R3### family)              |
| none                   | GSU2885              | NHL repeat domain protein                                      |

|                                        |           |                                                                |
|----------------------------------------|-----------|----------------------------------------------------------------|
| none                                   | GSU2884   | <i>omcA</i> ; cytochrome <i>c</i> , 24-27 heme-binding sites   |
| Gmet_0600                              | none      | cytochrome <i>c</i> , 19 heme-binding sites                    |
| none                                   | GSU2883   | <i>omcH</i> ; cytochrome <i>c</i> , 19-24 heme-binding sites   |
| Gmet_0601                              | none      | cytochrome <i>c</i> , 7 heme-binding sites                     |
| none                                   | GSU2882   | <i>omcG</i> ; cytochrome <i>c</i> , 14-18 heme-binding sites   |
| Gmet_0592?<br>Gmet_0572?               | GSU2881.1 | ResB-like family protein (cytochrome <i>c</i> biogenesis)      |
| Gmet_0594?<br>Gmet_0573?               | GSU2880   | ResC/HemX-like cytochrome <i>c</i> biogenesis membrane protein |
| <b>Gene cluster 4</b>                  |           |                                                                |
| none                                   | GSU0701   | <i>omcJ</i> ; cytochrome <i>c</i> , 6 heme-binding sites       |
| Gmet_0571?<br>Gmet_0575?<br>Gmet_0580? | GSU0702   | cytochrome <i>c</i> , 26-35 heme-binding sites                 |
| Gmet_0574?<br>Gmet_0593?               | GSU0703   | conserved hypothetical protein                                 |
| Gmet_0573?<br>Gmet_0594?               | GSU0704   | ResB-like family protein (cytochrome <i>c</i> biogenesis)      |
| Gmet_0572?<br>Gmet_0592?               | GSU0705   | ResC/HemX-like cytochrome <i>c</i> biogenesis membrane protein |

<sup>1</sup>Gene cluster 3 in *G. metallireducens* (Gmet\_0571 to Gmet\_0601) roughly corresponds to two clusters in *G. sulfurreducens* (GSU2899 to GSU2895 and GSU2893.1 to GSU2880), interrupted by GSU2894 with the opposite coding strand. The correspondence is complicated by the rearrangement of GSU2893/Gmet\_0595, acquisition/loss of the GSU0703 homologs Gmet\_0574 and Gmet\_0593, and presence of extra pairs of *c*-type cytochrome biogenesis genes (GSU2881.1-GSU2880; Gmet\_0572-Gmet\_0573 and Gmet\_0578-Gmet\_0579) and several other genes in one cluster or the other.
