# Supplementary material for: The genome sequence of Geobacter metallireducens: features of metabolism, physiology and regulation common and dissimilar to Geobacter sulfurreducens
Source: PubMed Central journal article supplement (PMC2700814; doi:10.1186/1471-2180-9-109), 2009-05-27
Supplement: 1471-2180-9-109-S11.pdf [file 1471-2180-9-109-S11.pdf]

Table S6. Transport systems of *G. sulfurreducens* and *G. metallireducens*.

| <b>Transporter substrate</b>                               | <b><i>G. metallireducens</i><br/>gene(s)</b> | <b><i>G. sulfurreducens</i><br/>gene(s)</b> |
|------------------------------------------------------------|----------------------------------------------|---------------------------------------------|
| Ammonium                                                   | Gmet_0695                                    | GSU0940                                     |
| Ammonium? <sup>1</sup>                                     | Gmet_1738                                    | GSU1221                                     |
| Quaternary ammonium compounds<br>(efflux protein SugE)     | Gmet_2960 <sup>2</sup>                       | GSU0707<br>GSU0708                          |
| Potassium (Kup)                                            | Gmet_0038                                    | GSU3346                                     |
|                                                            | Gmet_0039                                    | GSU2485                                     |
|                                                            | none                                         | GSU2350                                     |
| Potassium (ATPase KdpABCDE)                                | Gmet_2433-Gmet_2437                          | GSU2480-GSU2484                             |
| Potassium (antiport with proton)                           | none                                         | GSU1203                                     |
| Potassium (antiport with proton; KefB)                     | none                                         | GSU2759                                     |
| Potassium (antiport with proton; RosB)                     | Gmet_1105                                    | GSU1204                                     |
| Potassium? (antiport with proton)                          | none                                         | GSU0261                                     |
| Potassium? (TrkA domain)                                   | Gmet_0063                                    | none                                        |
| Sodium (antiport with proton;<br>MrpABCDEFG complex)       | none                                         | GSU2344-GSU2338                             |
| Sodium? (antiport with proton)                             | Gmet_1089                                    | GSU2303                                     |
| Magnesium/cobalt (CorA-1) <sup>3</sup>                     | Gmet_1189                                    | GSU1399                                     |
| Magnesium/cobalt/nickel (CorA-2) <sup>4</sup>              | Gmet_0134                                    | GSU3322                                     |
| Cobalt? (CbiMQO and porin)                                 | Gmet_2441-Gmet_2438                          | GSU1279-GSU1282                             |
| Cobalt? (CbiMQO)                                           | Gmet_0472-Gmet_0475                          | GSU3004 <sup>5</sup> ;<br>GSU3002-GSU3001   |
| Cobalt/zinc/cadmium? (efflux pump)                         | Gmet_3071                                    | GSU0487                                     |
| Cobalt/zinc/cadmium? (efflux pump)                         | Gmet_0858                                    | GSU2613                                     |
| Cobalt/zinc/cadmium? (efflux pump)                         | Gmet_0515                                    | GSU2959                                     |
| Zinc? (ZIP family)                                         | none                                         | GSU0206                                     |
| Ferrous iron (FeoB-2)                                      | none                                         | GSU3268                                     |
| Ferrous iron? (FeoB-1)                                     | Gmet_2444                                    | GSU1380                                     |
| Manganese? Zinc? Iron? Nickel? (ABC-<br>type)              | Gmet_0491-Gmet_0493                          | GSU2986-GSU2984                             |
| Copper (P-type ATPase and membrane<br>proteins)            | Gmet_2774-Gmet_2772                          | GSU2454-GSU2452                             |
| Heavy metal? (efflux pump)                                 | Gmet_3507-Gmet_3509                          | GSU0828-GSU0830                             |
|                                                            | none                                         | GSU2137-GSU2135                             |
|                                                            | none                                         | GSU3398-GSU3400                             |
| Heavy metal? (ABC-type and protein of<br>unknown function) | Gmet_1556-Gmet_1552                          | GSU1338 <sup>6</sup> -GSU1341               |
| Heavy metal? (ABC-type)                                    | none                                         | GSU0677-GSU0678                             |
| Heavy metal efflux? (P-type ATPase)                        | none                                         | GSU2147                                     |
| Metal ion (efflux pump and protein of<br>unknown function) | Gmet_1549-Gmet_1546                          | GSU1330-GSU1333                             |
| Cations (E1-E2 family efflux ATPase)                       | Gmet_1614                                    | GSU1678                                     |

|                                                                                             |                     |                               |
|---------------------------------------------------------------------------------------------|---------------------|-------------------------------|
| MgtA)                                                                                       |                     |                               |
| Cations (E1-E2 family efflux ATPase)                                                        | none                | GSU2325                       |
|                                                                                             | Gmet_3497           | GSU2351                       |
| Cations (CorB-type and membrane protein)                                                    | Gmet_1153-Gmet_1154 | GSU0853-GSU0854               |
| Ion (stomatin-like channel)                                                                 | Gmet_0813-Gmet_0814 | GSU2431-GSU2430               |
| Ions (mechanosensitive channels)                                                            | none                | GSU1557                       |
|                                                                                             | Gmet_1942           | GSU1633                       |
|                                                                                             | none                | GSU1723                       |
|                                                                                             | Gmet_2581           | GSU2316                       |
|                                                                                             | Gmet_2522           | GSU2794                       |
| Chloride (voltage-gated channel)                                                            | Gmet_3470           | GSU2363                       |
| Phosphate (ABC-type PstSCAB-PhoU)                                                           | Gmet_2701-Gmet_2705 | GSU1099-GSU1095               |
| Phosphate? (NptA-related sodium/anion symporter)                                            | Gmet_1829           | GSU1742                       |
| Phosphate?<br>(orthophosphate/polyphosphate-selective porin family)                         | Gmet_1042           | none                          |
| Phosphate/sulfate? (PitA and regulator)                                                     | Gmet_3132-Gmet_3131 | GSU0388-GSU0389               |
| Sulfate (ABC-type CysPTWA)                                                                  | Gmet_1906-Gmet_1903 | GSU1346-GSU1349               |
| Sulfate? (proton/anion symporter)                                                           | none                | GSU2312                       |
| Molybdate (ABC-type ModABC)                                                                 | Gmet_0512-Gmet_0514 | GSU2962-GSU2960               |
| Tungstate (ABC-type TupBA)                                                                  | Gmet_1041-Gmet_1039 | GSU2700-GSU2702               |
| Arsenite (ABC-type, tyrosine phosphatase, ArsR regulator, efflux pump and membrane protein) | Gmet_0524-Gmet_0519 | GSU2950-GSU2955               |
| Nitrate (symport with proton; NarK-1)                                                       | Gmet_0333           | none                          |
| Nitrate/nitrite (antiport; NarK-2)                                                          | Gmet_0334           | none                          |
| Chromate                                                                                    | Gmet_2732-Gmet_2731 | none                          |
| Dicarboxylic acids ( <i>dcuB</i> )                                                          | none                | GSU2751                       |
| Anion                                                                                       | Gmet_2857           | none                          |
| L-lactate/glycolate?                                                                        | none                | GSU0226                       |
|                                                                                             | none                | GSU1622                       |
| Formate? (FNT family)                                                                       | none                | GSU0234                       |
| Hexuronate?                                                                                 | none                | GSU0249                       |
| Amino acid? (ABC-type and MarC-related membrane protein)                                    | none                | GSU0800-GSU0797               |
| Amino acid? (ABC-type)                                                                      | none                | GSU2649-GSU2651               |
|                                                                                             | none                | GSU3406-GSU3404               |
| Branched-chain amino acids? (ABC-type)                                                      | Gmet_1824-Gmet_1819 | GSU1736 <sup>7</sup> -GSU1730 |
|                                                                                             | none                | GSU2005-GSU2009               |
|                                                                                             | none                | GSU3391-GSU3394               |
| Homoserine/homoserine lactone/threonine? (efflux protein)                                   | none                | GSU1194                       |
|                                                                                             | Gmet_0798           | none                          |
|                                                                                             | none                | GSU1545                       |

|                                                                                 |                                          |                                  |
|---------------------------------------------------------------------------------|------------------------------------------|----------------------------------|
| Arginine? (efflux protein)                                                      | none                                     | GSU2777                          |
| Guanine/hypoxanthine                                                            | Gmet_2715                                | GSU1019                          |
| Uracil                                                                          | none                                     | GSU0932                          |
| Aromatic hydrocarbons? (inner and outer membrane proteins and ATPase)           | Gmet_1537-Gmet_1534                      | none                             |
| Polyisoprenoids (periplasmic protein YceI)                                      | Gmet_3449                                | none                             |
| Lipid A (ABC-type, MsbA family)                                                 | Gmet_2349                                | GSU2260                          |
| 3-deoxy-D-manno-octulosonate? (ABC-type YhbNG)                                  | Gmet_1281-Gmet_1282                      | GSU1889-GSU1888                  |
| O-antigen (ABC-2 family)                                                        | Gmet_1406-Gmet_1407                      | GSU1504-GSU1505                  |
| O-antigen/teichoic acid? (membrane protein)                                     | Gmet_2012                                | none                             |
| Oligopeptides? (ABC-type)                                                       | Gmet_0848-Gmet_0847, Gmet_1234-Gmet_1236 | GSU2623-GSU2624, GSU1433-GSU1435 |
| Lipoprotein (ABC-type LolDE)                                                    | Gmet_2359-Gmet_2358                      | GSU2270-GSU2269                  |
|                                                                                 | none                                     | GSU2188-GSU2187                  |
|                                                                                 | Gmet_1518-Gmet_1517                      | none                             |
| Protease (ABC-type and efflux pump outer membrane and membrane fusion proteins) | none                                     | GSU0278-GSU0276                  |
| Exopolysaccharide? (membrane protein)                                           | none                                     | GSU0629                          |
|                                                                                 | Gmet_2888                                | none                             |
| Exopolysaccharide? (outer membrane protein)                                     | Gmet_2030                                | GSU1985                          |
| Biopolymer? (TolQRB-TonB-type)                                                  | Gmet_3537-Gmet_3540                      | GSU0028-GSU0025                  |
| Biopolymer? (TolQR-type)                                                        | Gmet_1459-Gmet_1460                      | none                             |
| Nucleic acids? (uptake proteins ComEA and ComEC)                                | Gmet_1878, Gmet_1915                     | GSU1797, GSU1657                 |
| Cell division-related (FtsEX, ABC-type)                                         | Gmet_1855-Gmet_1854                      | GSU1775-GSU1774                  |
| Unknown                                                                         | none                                     | GSU2317                          |
|                                                                                 | Gmet_0568-Gmet_0570                      | GSU2903-GSU2901                  |
| Unknown (membrane protein)                                                      | none                                     | GSU0265                          |
|                                                                                 | none                                     | GSU0268                          |
|                                                                                 | none                                     | GSU0752                          |
|                                                                                 | none                                     | GSU0758                          |
|                                                                                 | Gmet_2550                                | GSU1016                          |
|                                                                                 | Gmet_2050                                | GSU1998                          |
|                                                                                 | none                                     | GSU2677                          |
|                                                                                 | Gmet_0563                                | GSU2907                          |
|                                                                                 | none                                     | GSU3407                          |
|                                                                                 | Gmet_1490                                | none                             |
|                                                                                 | Gmet_1663                                | none                             |
| Unknown (TerC-related)                                                          | Gmet_1155                                | GSU1570                          |
|                                                                                 | Gmet_1782                                | GSU1336                          |

|                                                                                      |                                 |                           |
|--------------------------------------------------------------------------------------|---------------------------------|---------------------------|
| Unknown (YjgPQ-type)                                                                 | Gmet_1249-Gmet_1248             | GSU1922-GSU1923           |
| Unknown (sodium/solute symporter)                                                    | Gmet_2061                       | none                      |
| Unknown (sodium/solute symporter)                                                    | Gmet_3031                       | GSU0518                   |
| Unknown <sup>8</sup> (sodium/solute symporters)                                      | Gmet_0739, Gmet_3288            | GSU1068, GSU1070, GSU2352 |
| Unknown (membrane importer Tim44 subunit)                                            | Gmet_1927                       | GSU1091                   |
| Unknown (exporter)                                                                   | Gmet_2183                       | GSU1855                   |
| Unknown (exporter, RND superfamily)                                                  | Gmet_2244                       | none                      |
| Unknown (exporter, outer membrane lipoprotein LolB, and carrier/sorter protein LolA) | Gmet_1698, Gmet_3378, Gmet_1699 | GSU0457.1-GSU0456         |
| Unknown (drug resistance?)                                                           | Gmet_1682                       | GSU0264                   |
| Unknown (DUF6 domain membrane protein)                                               | Gmet_2977                       | GSU0545                   |
|                                                                                      | none                            | GSU3388                   |
|                                                                                      | none                            | GSU3390                   |
|                                                                                      | Gmet_3456                       | none                      |
| Unknown (sodium-driven?)                                                             | none                            | GSU0844                   |
| Unknown (ACR3 family)                                                                | none                            | GSU1411                   |
| Unknown (TRAP-type)                                                                  | none                            | GSU2055-GSU2057           |
| Unknown (TRAP-type solute receptor)                                                  | none                            | GSU2692                   |
| Unknown (OstA-type)                                                                  | Gmet_2474                       | GSU2367                   |
| Unknown (major facilitator superfamily)                                              | none                            | GSU2491                   |
|                                                                                      | none                            | GSU3264                   |
|                                                                                      | Gmet_2251                       | none                      |
|                                                                                      | Gmet_3221                       | none                      |
| Unknown (DUF81 domain membrane protein)                                              | Gmet_1097                       | none                      |
| Unknown (ABC-2 family membrane protein)                                              | Gmet_2545                       | GSU0922                   |
|                                                                                      | Gmet_0014                       | GSU3455                   |
| Unknown (membrane protein and TonB-type)                                             | Gmet_1157-Gmet_1158             | GSU0857-GSU0858           |
| Unknown (periplasmic protein)                                                        | Gmet_0781                       | none                      |
|                                                                                      | Gmet_0986                       | GSU2017                   |
| Unknown (ABC-type periplasmic protein)                                               | none                            | GSU1397                   |
|                                                                                      | Gmet_1244                       | GSU1444                   |
|                                                                                      | none                            | GSU1528                   |
|                                                                                      | none                            | GSU2389                   |
|                                                                                      | none                            | GSU3401                   |
|                                                                                      | Gmet_2771                       | none                      |
| Unknown (ABC-type periplasmic protein DUF534)                                        | Gmet_1746                       | GSU1230                   |
| Unknown (ligand-gated porin and ABC-type periplasmic protein DUF534)                 | Gmet_2735-Gmet_2736             | GSU0883-GSU0882           |
| Unknown (ABC-type ATP-binding)                                                       | Gmet_0013                       | GSU0011                   |

|                                                                                |                     |                              |
|--------------------------------------------------------------------------------|---------------------|------------------------------|
| protein)                                                                       | Gmet_2630           | GSU0169                      |
|                                                                                | Gmet_1743           | GSU1227                      |
|                                                                                | Gmet_1926           | GSU1644                      |
|                                                                                | Gmet_2524           | GSU2093                      |
|                                                                                | Gmet_2479           | none                         |
| Unknown (ABC-type)                                                             | Gmet_3423           | GSU0093                      |
|                                                                                | Gmet_3416           | GSU0101                      |
|                                                                                | none                | GSU0211-GSU0212              |
|                                                                                | Gmet_2543-Gmet_2541 | GSU0924-GSU0926              |
|                                                                                | Gmet_1401-Gmet_1403 | GSU1499-GSU1501              |
|                                                                                | none                | GSU2413-GSU2414              |
|                                                                                | Gmet_0996-Gmet_0998 | none                         |
| Gmet_1899-Gmet_1901                                                            | none                |                              |
| Unknown (DUF140 ABC-type)                                                      | Gmet_2543-Gmet_2541 | GSU0924-GSU0926              |
|                                                                                | Gmet_1271-Gmet_1272 | GSU1900-GSU1899              |
| Unknown (DUF140 ABC-type and efflux pump outer membrane protein)               | Gmet_0788-Gmet_0784 | GSU0817-GSU0813              |
| Unknown (efflux pump YbhG and ABC-type YbhFSR)                                 | Gmet_0659-Gmet_0655 | GSU2823-GSU2826              |
| Unknown (ABC-type and membrane protein)                                        | none                | GSU1260-GSU1262              |
| Unknown (ABC-type and efflux pump membrane fusion protein)                     | Gmet_3038-Gmet_3036 | GSU0496-GSU0496.2            |
|                                                                                | Gmet_2408-Gmet_2405 | GSU1161-GSU1164              |
|                                                                                | none                | GSU2687-GSU2685              |
| Unknown (ABC-type and efflux pump outer membrane and membrane fusion proteins) | none                | GSU0950-GSU0947              |
|                                                                                | Gmet_3465-Gmet_3460 | none                         |
| Unknown (outer membrane receptor)                                              | Gmet_1245           | GSU1445                      |
| Unknown (ligand-gated porin)                                                   | Gmet_1669           | none                         |
| Unknown (TonB-dependent ligand-gated receptor)                                 | none                | GSU2982-GSU2981              |
| Unknown (efflux pump outer membrane protein)                                   | Gmet_1190           | none                         |
| Unknown (efflux pump EmrAB and outer membrane protein)                         | Gmet_1376-Gmet_1374 | GSU1482-GSU1480              |
| Unknown (efflux pump)                                                          | Gmet_3129-Gmet_3127 | GSU0391-GSU0392, GSU0394     |
|                                                                                | Gmet_1650-Gmet_1652 | GSU1609-GSU1611              |
|                                                                                | Gmet_2519-Gmet_2517 | GSU2665-GSU2664 <sup>9</sup> |
|                                                                                | Gmet_0809-Gmet_0811 | GSU2697-GSU2695              |
|                                                                                | none                | GSU2781-GSU2782              |
| Gmet_1666-Gmet_1664                                                            | none                |                              |
| Unknown (sodium-driven efflux pump)                                            | Gmet_2508           | GSU2653                      |
|                                                                                | Gmet_0358           | GSU3129                      |
| Unknown (porin)                                                                | Gmet_0802           | GSU0767                      |

|                                  |                     |                  |
|----------------------------------|---------------------|------------------|
|                                  | Gmet_0532           | GSU2939          |
|                                  | none                | GSU3271          |
|                                  | Gmet_0783           | none             |
|                                  | Gmet_1101           | none             |
|                                  | Gmet_1194-Gmet_1193 | none             |
|                                  | Gmet_1200           | none             |
|                                  | Gmet_1649           | none             |
|                                  | Gmet_1995           | none             |
|                                  | Gmet_1998           | none             |
|                                  | Gmet_2192           | none             |
|                                  | Gmet_2624           | none             |
|                                  | Gmet_2831           | none             |
| Unknown (porin OmpJ and paralog) | Gmet_3254           | GSU3304, GSU3403 |

<sup>1</sup>The alignment with known ammonium transporters is unsatisfactory.

<sup>2</sup>Duplicate transporter genes GSU0707 and GSU0708 correspond to a single gene, Gmet\_2960, inactivated by an internal stop codon.

<sup>3</sup>*Thermotoga*-type CorA protein.

<sup>4</sup>Enteric-type CorA protein.

<sup>5</sup>The two domains of CbiM represented by Gmet\_0472 and Gmet\_0473 are fused in GSU3004.

<sup>6</sup>Heavy metal-binding domain protein GSU1338 is duplicated as Gmet\_1556 and Gmet\_1555.

<sup>7</sup>*G. sulfurreducens* and other *Geobacteraceae* have duplicate periplasmic amino acid-binding protein genes (GSU1734-GSU1735); *G. metallireducens* has only Gmet\_1823, a GSU1734 ortholog.

<sup>8</sup>These symporters are very closely related to each other, and co-transcribed with members of an uncharacterized protein family.

<sup>9</sup>The inner membrane protein and outer membrane protein represented by Gmet\_2518 and Gmet\_2517 are fused in GSU2664, suggesting that they must be proteolytically separated to accommodate the membrane fusion protein GSU2665 (Gmet\_2519).
