# Supplementary material for: The genome sequence of Geobacter metallireducens: features of metabolism, physiology and regulation common and dissimilar to Geobacter sulfurreducens
Source: PubMed Central journal article supplement (PMC2700814; doi:10.1186/1471-2180-9-109), 2009-05-27
Supplement: 1471-2180-9-109-S12.pdf [file 1471-2180-9-109-S12.pdf]

Table S7. Sensor histidine kinases (HATPase\_c domain proteins), response receivers (REC domain proteins), and transcriptional regulators of *G. metallireducens*.

| Gene                            | GSU match | Specific Annotation and Domain Architecture                                    |
|---------------------------------|-----------|--------------------------------------------------------------------------------|
| <b>Sensor histidine kinases</b> |           |                                                                                |
| Gmet_0009                       | GSU0007   | HAMP, PAS, HisKA, HATPase_c                                                    |
| Gmet_0010                       | GSU0008   | REC, PAS, HisKA, HATPase_c                                                     |
| Gmet_0011                       | GSU0009   | PAS, HisKA, HATPase_c                                                          |
| Gmet_0012                       | GSU0010   | REC, unknown, HisKA, HATPase_c                                                 |
| Gmet_0043                       | GSU3350   | HisKA, HATPase_c, REC, GGDEF                                                   |
| Gmet_0077                       | none      | HAMP, HisKA, HATPase_c, REC                                                    |
| Gmet_0197                       | GSU0144   | PAS, GAF, HisKA, HATPase_c                                                     |
| Gmet_0202                       | GSU0149   | REC, HisKA, HATPase_c                                                          |
| Gmet_0350                       | GSU3138   | REC, HisKA, HATPase_c                                                          |
| Gmet_0500                       | none      | PAS, HisKA, HATPase_c                                                          |
| Gmet_0527                       | GSU2947   | HAMP, HisKA, HATPase_c                                                         |
| Gmet_0554                       | GSU2916   | HAMP, HisKA, HATPase_c (nonconserved heme-binding site)                        |
| Gmet_0666                       | GSU2815   | PAS, PAS, HisKA, HATPase_c                                                     |
| Gmet_0687                       | none      | HisKA, HATPase_c                                                               |
| Gmet_0696                       | GSU0941   | HisKA, HATPase_c                                                               |
| Gmet_0701                       | GSU0962   | HAMP, HisKA, HATPase_c                                                         |
| Gmet_0713                       | GSU0475   | PAS, PAC, HisKA, HATPase_c                                                     |
| Gmet_0731                       | none      | PAS, PAC, HisKA, HATPase_c                                                     |
| Gmet_0777                       | GSU0812   | nitrogen regulation sensor histidine kinase NtrY (HAMP, PAS, HisKA, HATPase_c) |
| Gmet_0875                       | none      | REC, HisKA, HATPase_c                                                          |
| Gmet_0960                       | GSU2042   | HAMP, HisKA, HATPase_c                                                         |
| Gmet_1005                       | none      | FhlA, PAS, PAC, HisKA, HATPase_c                                               |
| Gmet_1027                       | none      | HAMP, HisKA, HATPase_c                                                         |
| Gmet_1054                       | none      | FhlA, HisKA, HATPase_c                                                         |
| Gmet_1057                       | GSU0775   | HAMP, HisKA, HATPase_c                                                         |
| Gmet_1080                       | none      | CheA                                                                           |
| Gmet_1083                       | none      | PAS, PAS, PAC, HisKA, HATPase_c                                                |
| Gmet_1212                       | none      | PAS, HisKA, HATPase_c                                                          |
| Gmet_1218                       | none      | PAS, PAC, PAS, PAC, AtoS, HisKA, HATPase_c                                     |
| Gmet_1219                       | none      | REC, HisKA, HATPase_c                                                          |
| Gmet_1243                       | GSU1443   | HAMP, HisKA, HATPase_c, REC                                                    |
| Gmet_1292                       | GSU1878   | HisKA, HATPase_c                                                               |
| Gmet_1379                       | none      | HATPase_c                                                                      |
| Gmet_1396                       | GSU1494   | HisKA, HATPase_c                                                               |
| Gmet_1667                       | none      | HAMP, HATPase_c                                                                |
| Gmet_1670                       | none      | REC, HisKA, HATPase_c                                                          |
| Gmet_1707                       | none      | PAS, PAS, PAC, HisKA, HATPase_c, REC                                           |
| Gmet_1765                       | GSU1265   | incomplete HisKA, HATPase_c, REC                                               |

|           |         |                                                                                 |
|-----------|---------|---------------------------------------------------------------------------------|
| Gmet_1918 | GSU1655 | REC, PAS, PAC, HisKA, HATPase_c, REC                                            |
| Gmet_1945 | GSU1630 | HAMP, PAS, HisKA, HATPase_c                                                     |
| Gmet_1991 | GSU1939 | GAF, HisKA, HATPase_c, GAF, HD                                                  |
| Gmet_1993 | GSU1941 | GAF, HATPase_c                                                                  |
| Gmet_2035 | GSU1990 | NtrB-related (HisKA, HATPase_c)                                                 |
| Gmet_2146 | none    | HisKA, HATPase_c                                                                |
| Gmet_2159 | none    | PAS, HATPase_c                                                                  |
| Gmet_2186 | none    | REC, HisKA, HATPase_c                                                           |
| Gmet_2287 | GSU2189 | HATPase_c (nonconserved heme-binding site)                                      |
| Gmet_2311 | GSU2222 | CheA                                                                            |
| Gmet_2426 | GSU1302 | HAMP, HisKA, HATPase_c, REC (1 heme-binding site)                               |
| Gmet_2427 | GSU1290 | CheA                                                                            |
| Gmet_2436 | GSU2483 | osmosensitive potassium channel sensor histidine kinase KdpD (HisKA, HATPase_c) |
| Gmet_2454 | GSU1319 | HisKA, HATPase_c                                                                |
| Gmet_2460 | none    | HATPase_c                                                                       |
| Gmet_2540 | none    | HATPase_c                                                                       |
| Gmet_2562 | GSU1004 | PAS, HATPase_c                                                                  |
| Gmet_2639 | none    | REC, HisKA, HATPase_c                                                           |
| Gmet_2642 | none    | GAF, HATPase_c, REC, REC, REC                                                   |
| Gmet_2677 | GSU1119 | REC, HisKA, HATPase_c                                                           |
| Gmet_2694 | GSU1101 | HAMP, PAS, HisKA, HATPase_c                                                     |
| Gmet_2698 | none    | GAF, HisKA, HATPase_c                                                           |
| Gmet_2710 | none    | HPT, HATPase_c, CheAreg, REC                                                    |
| Gmet_2712 | none    | REC, HisKA, HATPase_c                                                           |
| Gmet_2737 | GSU0881 | HAMP, HisKA, HATPase_c                                                          |
| Gmet_2748 | GSU2384 | GAF, HisKA, HATPase_c                                                           |
| Gmet_2762 | GSU1036 | Chase, HisKA, ATPase                                                            |
| Gmet_2770 | none    | HisKA, HATPase_c                                                                |
| Gmet_2788 | none    | PBPb, HisKA, HATPase_c                                                          |
| Gmet_2790 | none    | REC, HisKA, HATPase_c                                                           |
| Gmet_2811 | GSU2297 | Cache, HAMP, PAS, PAC, HisKA, HATPase_c                                         |
| Gmet_2824 | none    | PAS, GAF, HATPase_c, REC                                                        |
| Gmet_2923 | GSU0599 | HAMP, HisKA, HATPase_c (2 heme-binding sites)                                   |
| Gmet_2956 | none    | PAS, FhlA, FhlA, HisKA, HATPase_c                                               |
| Gmet_2998 | none    | HisKA, HATPase_c, REC                                                           |
| Gmet_3157 | GSU0373 | HAMP, HisKA, HATPase_c                                                          |
| Gmet_3180 | GSU3252 | GAF, HisKA, HATPase_c                                                           |
| Gmet_3266 | GSU0296 | CheA                                                                            |
| Gmet_3279 | GSU0283 | GAF, GAF, HisKA, HATPase_c                                                      |
| Gmet_3382 | GSU0452 | HAMP, HisKA, HATPase_c                                                          |
| Gmet_3432 | none    | HisKA, HATPase_c                                                                |
| Gmet_3455 | none    | PAS, HisKA, HATPase_c                                                           |
| Gmet_3474 | none    | HATPase_c                                                                       |
| Gmet_3477 | none    | HAMP, PAS, PAS, PAS, PAS, HATPase_c, REC, PAS                                   |

|                                       |         |                                                                            |
|---------------------------------------|---------|----------------------------------------------------------------------------|
| Gmet_3478                             | none    | HAMP, PAS, PAC, PAS, HATPase_c                                             |
| <b>REC domain-containing proteins</b> |         |                                                                            |
| Gmet_0010                             | GSU0008 | REC, PAS, HisKA, HATPase_c                                                 |
| Gmet_0012                             | GSU0010 | REC, unknown, HisKA, HATPase_c                                             |
| Gmet_0043                             | GSU3350 | HisKA, HATPase_c, REC, GGDEF                                               |
| Gmet_0069                             | GSU3376 | REC, GGDEF                                                                 |
| Gmet_0077                             | none    | HAMP, HisKA, HATPase_c, REC                                                |
| Gmet_0202                             | GSU0149 | REC, HisKA, HATPase_c                                                      |
| Gmet_0350                             | GSU3138 | REC, HisKA, HATPase_c                                                      |
| Gmet_0501                             | GSU2535 | REC                                                                        |
| Gmet_0555                             | GSU2524 | REC, sigma-54 interaction, HTH8                                            |
| Gmet_0660                             | GSU2822 | REC, ANTAR                                                                 |
| Gmet_0688                             | none    | REC, transregC                                                             |
| Gmet_0702                             | GSU0963 | REC, sigma-54 interaction, HTH8                                            |
| Gmet_0762                             | GSU1090 | REC                                                                        |
| Gmet_0776                             | GSU0811 | nitrogen response regulator NtrX (REC, sigma-54 interaction, HTH8)         |
| Gmet_0778                             | none    | CheY-11                                                                    |
| Gmet_0812                             | GSU1129 | REC, sigma-54 interaction                                                  |
| Gmet_0875                             | none    | REC, HisKA, HATPase_c                                                      |
| Gmet_0945                             | GSU2062 | REC, incomplete GGDEF                                                      |
| Gmet_0955                             | GSU2046 | REC                                                                        |
| Gmet_0961                             | GSU2041 | REC, sigma-54 interaction, HTH8                                            |
| Gmet_1026                             | none    | REC, transregC                                                             |
| Gmet_1055                             | none    | REC, sigma-54 interaction, HTH8                                            |
| Gmet_1058                             | GSU0776 | REC, sigma-54 interaction, HTH8                                            |
| Gmet_1075                             | none    | chemotaxis protein-glutamate methyltransferase CheB-6 (REC, CheB_methylst) |
| Gmet_1082                             | GSU1250 | REC, sigma-54 interaction, HTH8                                            |
| Gmet_1219                             | none    | REC, HisKA, HATPase_c                                                      |
| Gmet_1220                             | GSU1417 | REC                                                                        |
| Gmet_1243                             | GSU1443 | HAMP, HisKA, HATPase_c, REC                                                |
| Gmet_1291                             | GSU1879 | REC, transregC                                                             |
| Gmet_1378                             | none    | REC                                                                        |
| Gmet_1397                             | GSU1495 | REC, sigma-54 interaction, HTH8                                            |
| Gmet_1551                             | none    | REC                                                                        |
| Gmet_1607                             | GSU1619 | CheY-4                                                                     |
| Gmet_1670                             | none    | REC, HisKA, HATPase_c                                                      |
| Gmet_1706                             | GSU2313 | REC, GGDEF                                                                 |
| Gmet_1707                             | none    | PAS, PAS, PAC, HisKA, HATPase_c, REC                                       |
| Gmet_1737                             | GSU1220 | GspIEN, REC                                                                |
| Gmet_1747                             | GSU1231 | REC-related                                                                |
| Gmet_1765                             | GSU1265 | incomplete HisKA, HATPase_c, REC                                           |
| Gmet_1914                             | GSU1658 | REC, GGDEF                                                                 |
| Gmet_1917                             | GSU1656 | REC, PAS, GGDEF                                                            |

|           |           |                                                                            |
|-----------|-----------|----------------------------------------------------------------------------|
| Gmet_1918 | GSU1655   | REC, PAS, PAC, HisKA, HATPase_c, REC                                       |
| Gmet_1919 | GSU1654   | REC, HD                                                                    |
| Gmet_1992 | GSU1940   | REC, sigma-54 interaction, HTH8                                            |
| Gmet_2034 | GSU1989   | REC, sigma-54 interaction                                                  |
| Gmet_2145 | none      | REC, sigma-54 interaction, HTH8                                            |
| Gmet_2157 | none      | REC, HTHaraC                                                               |
| Gmet_2158 | GSU3229   | REC, HTHluxR                                                               |
| Gmet_2186 | none      | REC, HisKA, HATPase_c                                                      |
| Gmet_2302 | GSU2212   | CheY-5                                                                     |
| Gmet_2304 | GSU2214   | chemotaxis protein-glutamate methyltransferase CheB-3 (REC, CheB_methylst) |
| Gmet_2308 | GSU2219   | CheY-10                                                                    |
| Gmet_2312 | GSU2223   | CheY-6                                                                     |
| Gmet_2418 | GSU1145   | chemotaxis protein-glutamate methyltransferase CheB-2 (REC, CheB_methylst) |
| Gmet_2426 | GSU1302   | HAMP, HisKA, HATPase_c, REC (1 heme-binding site)                          |
| Gmet_2428 | GSU1289   | CheY-3                                                                     |
| Gmet_2431 | GSU1286   | CheY-2                                                                     |
| Gmet_2437 | GSU2484   | osmosensitive potassium channel response regulator KdpE (REC, transregC)   |
| Gmet_2453 | GSU1320   | REC, sigma-54 interaction, HTH8                                            |
| Gmet_2563 | GSU1003   | REC, sigma-54 interaction, HTH8                                            |
| Gmet_2639 | none      | REC, HisKA, HATPase_c                                                      |
| Gmet_2642 | none      | GAF, HATPase_c, REC, REC, REC                                              |
| Gmet_2677 | GSU1119   | REC, HisKA, HATPase_c                                                      |
| Gmet_2679 | GSU1117   | REC                                                                        |
| Gmet_2693 | GSU1102   | REC, transregC                                                             |
| Gmet_2710 | none      | HPT, HATPase_c, CheAreg, REC                                               |
| Gmet_2711 | none      | chemotaxis protein-glutamate methyltransferase CheB-8 (REC, CheB_methylst) |
| Gmet_2712 | none      | REC, HisKA, HATPase_c                                                      |
| Gmet_2739 | GSU0879   | CheV (CheW, REC)                                                           |
| Gmet_2789 | none      | REC                                                                        |
| Gmet_2790 | none      | REC, HisKA, HATPase_c                                                      |
| Gmet_2818 | GSU0700   | REC, PAS, PAC, PAS, PAC, PP2C                                              |
| Gmet_2824 | none      | PAS, GAF, HATPase_c, REC                                                   |
| Gmet_2827 | GSU2756.2 | CheY-8                                                                     |
| Gmet_2914 | GSU0596   | REC                                                                        |
| Gmet_2924 | GSU0598   | REC, sigma-54 interaction, HTH8                                            |
| Gmet_2926 | GSU0596   | REC                                                                        |
| Gmet_2998 | none      | HisKA, HATPase_c, REC                                                      |
| Gmet_2999 | GSU1891   | REC, HDc                                                                   |
| Gmet_3117 | GSU0405   | REC                                                                        |
| Gmet_3119 | GSU0403   | CheY-1                                                                     |
| Gmet_3158 | GSU0372   | REC, sigma-54 interaction, HTH8                                            |

|                                                       |                                   |                                                                                                   |
|-------------------------------------------------------|-----------------------------------|---------------------------------------------------------------------------------------------------|
| Gmet_3179                                             | GSU3253                           | REC                                                                                               |
| Gmet_3211                                             | GSU3198                           | CheY-7                                                                                            |
| Gmet_3218                                             | GSU3261                           | REC                                                                                               |
| Gmet_3220                                             | GSU0877                           | REC, PilZ                                                                                         |
| Gmet_3263                                             | GSU0298,<br>GSU300<br>(fragments) | REC, sigma-54 interaction                                                                         |
| Gmet_3269                                             | GSU2093                           | chemotaxis protein-glutamate methyltransferase CheB-1 (REC, CheB_methylst)                        |
| Gmet_3383                                             | GSU0451                           | REC, transregC                                                                                    |
| Gmet_3414                                             | GSU0104                           | REC                                                                                               |
| Gmet_3472                                             | none                              | REC                                                                                               |
| Gmet_3473                                             | none                              | REC, PulE                                                                                         |
| Gmet_3476                                             | none                              | REC, HDc                                                                                          |
| Gmet_3477                                             | none                              | HAMP, PAS, PAS, PAS, PAS, HATPase_c, REC, PAS                                                     |
| <b>Transcriptional Regulators lacking REC domains</b> |                                   |                                                                                                   |
| Gmet_0055                                             | GSU3363                           | iron-sulfur cluster-binding transcriptional regulator (FehydlgC, FeS, sigma-54 interaction, HTH8) |
| Gmet_0056                                             | GSU3364                           | transcriptional regulator, CopG family                                                            |
| Gmet_0062                                             | GSU3370                           | transcriptional regulator, GntR family                                                            |
| Gmet_0088                                             | GSU3031                           | sigma-54 dependent transcriptional regulator                                                      |
| Gmet_0092                                             | GSU3421                           | transcriptional regulator, Crp/Fnr family                                                         |
| Gmet_0124                                             | GSU3329                           | predicted DNA-binding protein with helix-hairpin-helix motif                                      |
| Gmet_0130                                             | GSU3324                           | helix-turn-helix transcriptional regulator, LexA-related                                          |
| Gmet_0186                                             | GSU2817                           | transcriptional regulator, LysR family                                                            |
| Gmet_0200                                             | GSU0147                           | regulatory protein RecX                                                                           |
| Gmet_0215                                             | GSU0164                           | conserved hypothetical protein                                                                    |
| Gmet_0237                                             | GSU0191                           | cold shock DNA/RNA-binding domain protein                                                         |
| Gmet_0240                                             | GSU0187                           | helix-turn-helix and Zn ribbon transcriptional regulator                                          |
| Gmet_0315                                             | none                              | transcriptional regulator, XRE family                                                             |
| Gmet_0317                                             | none                              | transcriptional regulator                                                                         |
| Gmet_0339                                             | GSU0359                           | sigma-54-dependent sensor DNA-binding regulator (PAS, sigma-54 interaction, HTH8)                 |
| Gmet_0340                                             | none                              | cold shock DNA/RNA-binding domain protein                                                         |
| Gmet_0359                                             | none                              | transcriptional regulator, MarR family                                                            |
| Gmet_0370                                             | GSU3109                           | transcriptional regulator, IclR family                                                            |
| Gmet_0420                                             | GSU3060                           | transcriptional regulator, TetR family                                                            |
| Gmet_0436                                             | GSU3045                           | negative regulator of flagellin synthesis FlgM                                                    |
| Gmet_0490                                             | GSU2987.1                         | predicted DNA-binding protein with PD1-like DNA-binding motif                                     |
| Gmet_0494                                             | GSU2980                           | metal-binding domain transcriptional regulator                                                    |
| Gmet_0522                                             | GSU2952                           | transcriptional regulator, ArsR family                                                            |
| Gmet_0528                                             | GSU2946                           | DNA-binding heavy metal response regulator                                                        |
| Gmet_0530                                             | GSU2941                           | transcriptional regulator, LysR family                                                            |

|           |                    |                                                                                                                       |
|-----------|--------------------|-----------------------------------------------------------------------------------------------------------------------|
| Gmet_0741 | GSU1072            | transcriptional regulator, IclR family                                                                                |
| Gmet_0750 | GSU1992            | transcriptional regulator, Crp/Fnr family                                                                             |
| Gmet_0763 | GSU2475            | GAF sensor sigma-54-dependent transcriptional regulator (GAF, GAF, sigma-54 interaction)                              |
| Gmet_0803 | GSU0770            | transcriptional regulator, TetR family                                                                                |
| Gmet_0808 | GSU2698            | transcriptional regulator, TetR family                                                                                |
| Gmet_0846 | GSU0399            | transcriptional regulator, ArsR family                                                                                |
| Gmet_0871 | GSU2571            | Rrf2 family transcriptional regulator                                                                                 |
| Gmet_0901 | GSU2540            | transcriptional regulator, XRE family                                                                                 |
| Gmet_0970 | GSU2033            | transcriptional regulator, XRE family                                                                                 |
| Gmet_1007 | GSU1727            | zinc finger transcriptional regulator, TraR/DksA family                                                               |
| Gmet_1023 | none               | conserved hypothetical protein                                                                                        |
| Gmet_1051 | none               | predicted transcriptional regulator                                                                                   |
| Gmet_1084 | GSU2523            | transcriptional regulator, LysR family                                                                                |
| Gmet_1121 | none               | transcriptional regulator, GntR family                                                                                |
| Gmet_1127 | GSU2716            | sugar fermentation stimulation protein                                                                                |
| Gmet_1161 | GSU0861            | conserved hypothetical protein                                                                                        |
| Gmet_1221 | GSU1419            | helix-turn-helix DNA-binding protein, putative                                                                        |
| Gmet_1305 | GSU1863            | transcriptional regulator, Ros/MucR family                                                                            |
| Gmet_1339 | none               | transcriptional regulator, putative                                                                                   |
| Gmet_1418 | GSU1522            | transcriptional regulator, MerR family                                                                                |
| Gmet_1439 | GSU0041<br>GSU1617 | LexA repressor                                                                                                        |
| Gmet_1513 | none               | transcriptional regulator, LuxR family                                                                                |
| Gmet_1520 | none               | transcriptional regulator, TetR family                                                                                |
| Gmet_1542 | none               | sigma-54-dependent transcriptional activator of aromatic compound catabolism (XylRN, V4R, sigma-54 interaction, HTH8) |
| Gmet_1609 | none               | LexA-ImpB/MucB/SamB protein pseudogene fusion                                                                         |
| Gmet_1639 | GSU1702            | ROK domain transcriptional regulator/sugar kinase                                                                     |
| Gmet_1684 | GSU0266            | transcriptional regulator, LysR family                                                                                |
| Gmet_1724 | GSU2779            | transcriptional regulator, MerR family                                                                                |
| Gmet_1731 | GSU0175            | transcriptional regulator, TetR family                                                                                |
| Gmet_1768 | GSU1270            | pyrimidine operon regulatory protein PyrR; uracil phosphoribosyltransferase                                           |
| Gmet_1784 | none               | helix-turn-helix DNA-binding protein, putative                                                                        |
| Gmet_1791 | none               | helix-turn-helix DNA-binding protein, putative                                                                        |
| Gmet_1895 | GSU2587            | transcriptional regulator, MarR family                                                                                |
| Gmet_1907 | GSU1345            | transcriptional regulator, Rrf2 family                                                                                |
| Gmet_1931 | GSU1639            | transcriptional regulator, putative                                                                                   |
| Gmet_1986 | GSU1934            | Baf-related transcriptional regulator, putative                                                                       |
| Gmet_1987 | GSU1935            | biotin operon repressor and biotin--acetyl-CoA carboxylase ligase                                                     |
| Gmet_2055 | none               | sigma-54-dependent sensor DNA-binding regulator (PAS, sigma-54 interaction, HTH8)                                     |

|           |         |                                                                                                               |
|-----------|---------|---------------------------------------------------------------------------------------------------------------|
| Gmet_2064 | none    | transcriptional regulator, IclR family                                                                        |
| Gmet_2097 | none    | transcriptional regulator, putative                                                                           |
| Gmet_2099 | none    | aromatic catabolism-like transcriptional regulator (XylR, V4R, sigma-54 interaction, HTH8)                    |
| Gmet_2109 | none    | sigma-54-dependent sensor DNA-binding regulator (PAS, sigma-54 interaction, HTH8)                             |
| Gmet_2114 | none    | aromatic catabolism-like sigma-54-dependent transcriptional regulator (XylR, V4R, sigma-54 interaction, HTH8) |
| Gmet_2116 | none    | aromatic catabolism-like sigma-54-dependent transcriptional regulator (XylR, V4R, sigma-54 interaction, HTH8) |
| Gmet_2133 | none    | transcriptional regulator, MarR family                                                                        |
| Gmet_2216 | none    | transcriptional regulator, TetR family                                                                        |
| Gmet_2223 | none    | sigma 54-dependent transcriptional regulator FhlA (GAF, sigma-54 interaction, HTH8)                           |
| Gmet_2241 | none    | transcriptional regulator, TetR family                                                                        |
| Gmet_2259 | none    | transcriptional regulator, IclR family                                                                        |
| Gmet_2277 | none    | helix-turn-helix DNA-binding protein, putative                                                                |
| Gmet_2442 | GSU1382 | iron/manganese-dependent transcriptional regulator                                                            |
| Gmet_2445 | GSU1379 | ferric uptake regulation protein Fur                                                                          |
| Gmet_2491 | none    | transcriptional regulator, frameshifted                                                                       |
| Gmet_2534 | GSU1542 | transcriptional regulator, putative                                                                           |
| Gmet_2645 | none    | transcriptional regulator, TetR family                                                                        |
| Gmet_2681 | GSU1115 | transcriptional regulator, putative                                                                           |
| Gmet_2697 | none    | transcriptional regulator, LytR/AlgR family                                                                   |
| Gmet_2779 | GSU2460 | membrane-bound transcriptional regulator (ribonuclease BN-related)                                            |
| Gmet_2805 | none    | ROK domain transcriptional regulator/sugar kinase                                                             |
| Gmet_2889 | GSU0625 | helix-turn-helix transcriptional regulator, putative                                                          |
| Gmet_2950 | none    | helix-turn-helix transcriptional regulator fragment                                                           |
| Gmet_2989 | GSU0534 | transcriptional regulator, BadM/Rrf2 family                                                                   |
| Gmet_3027 | GSU0514 | transcriptional regulator, IclR family                                                                        |
| Gmet_3075 | GSU0483 | adenosine nucleotide-binding predicted transcriptional regulator ExsB                                         |
| Gmet_3086 | GSU0473 | helix-turn-helix transcriptional regulator, putative                                                          |
| Gmet_3164 | GSU0366 | transcriptional regulator, XRE family                                                                         |
| Gmet_3240 | GSU3292 | transcriptional regulator, Fur family                                                                         |
| Gmet_3247 | GSU3298 | transcriptional regulator with cupin-like beta-barrel domain, putative                                        |
| Gmet_3278 | GSU0284 | zinc finger transcriptional regulator, TraR/DksA family                                                       |
| Gmet_3285 | none    | sigma-54 dependent sensor DNA-binding regulator (PAS-like, sigma-54 interaction, HTH8)                        |
| Gmet_3286 | none    | transcriptional regulator, IclR family                                                                        |
| Gmet_3308 | none    | sigma-54 dependent DNA-binding transcriptional                                                                |

|           |         |                                                                       |
|-----------|---------|-----------------------------------------------------------------------|
|           |         | regulator (sigma-54 interaction, HTH8)                                |
| Gmet_3412 | GSU0107 | ParB-like nuclease domain protein, possible transcriptional regulator |
| Gmet_3438 | GSU0079 | helix-turn-helix transcriptional regulator with cupin domain          |
| Gmet_3450 | none    | winged-helix transcriptional regulator, MarR family                   |
| Gmet_3466 | GSU0951 | transcriptional regulator, TetR family                                |
| Gmet_3534 | GSU0031 | heat-inducible transcription repressor HrcA                           |
| Gmet_3554 | GSU3457 | amino acid-binding ACT domain regulatory protein                      |

Note: proteins with both HATPase\_c domains and REC domains appear in both lists.
