# Supplementary material for: The genome sequence of Geobacter metallireducens: features of metabolism, physiology and regulation common and dissimilar to Geobacter sulfurreducens
Source: PubMed Central journal article supplement (PMC2700814; doi:10.1186/1471-2180-9-109), 2009-05-27
Supplement: 1471-2180-9-109-S13.pdf [file 1471-2180-9-109-S13.pdf]

Table S8. Diguanylate cyclases (GGDEF domain proteins) of *G. sulfurreducens* and *G. metallireducens*.

| <b>Gene</b> | <b>GSU match</b> | <b>Specific Annotation and Domain Architecture</b>                                           |
|-------------|------------------|----------------------------------------------------------------------------------------------|
| Gmet_0043   | GSU3350          | sensor histidine kinase response receiver diguanylate cyclase (HisKA, HATPase_c, REC, GGDEF) |
| Gmet_0049   | none             | diguanylate cyclase (GGDEF)                                                                  |
| Gmet_0069   | GSU3376          | response receiver-modulated diguanylate cyclase (REC, GGDEF)                                 |
| Gmet_0700   | GSU0946          | sensor diguanylate cyclase/phosphoesterase (HAMP, PAS, GGDEF, EAL)                           |
| Gmet_0773   | GSU0808          | diguanylate cyclase (CAP_ED, GGDEF)                                                          |
| Gmet_0782   | none             | diguanylate cyclase/phosphoesterase (GGDEF, EAL)                                             |
| Gmet_0840   | GSU2632          | diguanylate cyclase (GGDEF)                                                                  |
| Gmet_0945   | GSU2062          | putative response receiver-modulated nucleotide cyclase (REC, GGDEF-related)                 |
| Gmet_0957   | GSU2044          | sensor diguanylate cyclase/phosphoesterase (GAF, GGDEF, EAL)                                 |
| Gmet_0987   | GSU2016          | sensor diguanylate cyclase/phosphoesterase (PAS, GGDEF, EAL)                                 |
| Gmet_1298   | GSU1870          | sensor diguanylate cyclase (GAF, GGDEF)                                                      |
| Gmet_1706   | GSU2313          | response receiver-modulated diguanylate cyclase (REC, GGDEF)                                 |
| Gmet_1914   | GSU1658          | response receiver-modulated diguanylate cyclase (REC, GGDEF)                                 |
| Gmet_1917   | GSU1656          | response receiver sensor diguanylate cyclase (REC, PAS, GGDEF)                               |
| Gmet_1989   | GSU1937          | putative nucleotide cyclase (HAMP, GGDEF-related)                                            |
| Gmet_2425   | none             | diguanylate cyclase (GGDEF)                                                                  |
| Gmet_2629   | none             | sensor diguanylate cyclase/phosphoesterase (GGDEF, EAL)                                      |
| Gmet_2721   | GSU0895          | sensor diguanylate cyclase (GAF, GGDEF)                                                      |
| Gmet_2982   | GSU0542          | diguanylate cyclase (GGDEF)                                                                  |
| Gmet_3085   | GSU0474          | sensor diguanylate cyclase/phosphoesterase (PAS, PAS, PAC, PAS, PAC, GGDEF, EAL)             |
| none        | GSU0537          | sensor diguanylate cyclase/phosphoesterase (PAS, GGDEF, EAL)                                 |
| none        | GSU0952          | diguanylate cyclase (GGDEF)                                                                  |
| none        | GSU1037          | response receiver-modulated diguanylate cyclase/phosphoesterase (REC, GGDEF, EAL)            |
| none        | GSU1399.1        | sensor diguanylate cyclase (PAS, GGDEF)                                                      |
| none        | GSU1554          | diguanylate cyclase (GGDEF)                                                                  |
| none        | GSU1643          | response receiver-modulated diguanylate cyclase (REC, GGDEF)                                 |
| none        | GSU1671          | response receiver-modulated diguanylate cyclase (REC,                                        |

|      |         |                                                                                     |
|------|---------|-------------------------------------------------------------------------------------|
|      |         | GGDEF)                                                                              |
| none | GSU1927 | response receiver sensor diguanylate cyclase/phosphoesterase (REC, PAS, GGDEF, EAL) |
| none | GSU2511 | sensor diguanylate cyclase/phosphoesterase (CHASE4, GGDEF, EAL)                     |
| none | GSU2534 | response receiver sensor diguanylate cyclase (REC, PAS, GGDEF)                      |
| none | GSU2828 | diguanylate cyclase (GGDEF)                                                         |
| none | GSU2969 | sensor diguanylate cyclase (PAS, GGDEF)                                             |
| none | GSU3356 | diguanylate cyclase (HAMP, GGDEF)                                                   |
