# Supplementary material for: The genome sequence of Geobacter metallireducens: features of metabolism, physiology and regulation common and dissimilar to Geobacter sulfurreducens
Source: PubMed Central journal article supplement (PMC2700814; doi:10.1186/1471-2180-9-109), 2009-05-27
Supplement: 1471-2180-9-109-S14.pdf [file 1471-2180-9-109-S14.pdf]

Table S9. Chemotaxis-type signalling proteins of *G. sulfurreducens* and *G. metallireducens*.

| <b>Locus Tag</b>                            | <b><i>G. sulfurreducens</i> gene</b> | <b><i>G. metallireducens</i> gene</b> |
|---------------------------------------------|--------------------------------------|---------------------------------------|
| <b>Methyl-accepting chemotaxis proteins</b> |                                      |                                       |
| <i>mcp001</i>                               | GSU0400                              | Gmet_2825 <sup>1</sup>                |
| <i>mcp002</i>                               | GSU0401                              | none                                  |
| <i>mcp003</i>                               | GSU0582                              | Gmet_2939                             |
| <i>mcp004</i>                               | GSU0583                              | Gmet_2938                             |
| <i>mcp005</i>                               | GSU0683                              | Gmet_2424 <sup>1</sup>                |
| <i>mcp006</i>                               | GSU0750                              | none                                  |
| <i>mcp007</i>                               | GSU0756                              | none                                  |
| <i>mcp008</i>                               | GSU0766                              | none                                  |
| <i>mcp009</i>                               | GSU0916                              | none                                  |
| <i>mcp010</i>                               | GSU0935                              | none                                  |
| <i>mcp011</i>                               | GSU1029                              | Gmet_0712                             |
| <i>mcp012</i>                               | GSU1030                              | Gmet_2825 <sup>1</sup>                |
| <i>mcp013</i>                               | GSU1032                              | none                                  |
| <i>mcp014</i>                               | GSU1033                              | Gmet_0821 <sup>1</sup>                |
| <i>mcp015</i>                               | GSU1033.1                            | Gmet_0821 <sup>1</sup>                |
| <i>mcp016</i>                               | GSU1035                              | none                                  |
| <i>mcp017</i>                               | GSU1041                              | none                                  |
| <i>mcp018</i>                               | GSU1140                              | Gmet_2423                             |
| <i>mcp019</i>                               | GSU1141                              | none                                  |
| <i>mcp020</i>                               | GSU1287                              | Gmet_2430                             |
| <i>mcp021</i>                               | GSU1294                              | none                                  |
| <i>mcp022</i>                               | GSU1298                              | Gmet_2424 <sup>1</sup>                |
| <i>mcp023</i>                               | GSU1300                              | Gmet_2424 <sup>1</sup>                |
| <i>mcp024</i>                               | GSU1303                              | none                                  |
| <i>mcp025</i>                               | GSU1304                              | none                                  |
| <i>mcp026</i>                               | GSU1374                              | none                                  |
| <i>mcp027</i>                               | GSU1704                              | Gmet_1641                             |
| <i>mcp028</i>                               | GSU2372                              | Gmet_2478                             |
| <i>mcp029</i>                               | GSU2423                              | Gmet_3324                             |
| <i>mcp030</i>                               | GSU2579                              | none                                  |
| <i>mcp031</i>                               | GSU2652                              | Gmet_0799                             |
| <i>mcp032</i>                               | GSU2942                              | Gmet_0529                             |
| <i>mcp033</i>                               | GSU3156                              | none                                  |
| <i>mcp034</i>                               | GSU3196                              | none                                  |
| <i>mcp035</i>                               | none                                 | Gmet_1078                             |
| <i>mcp036</i>                               | none                                 | Gmet_2422                             |
| <i>mcp037</i>                               | none                                 | Gmet_2709                             |
| <i>mcp038</i>                               | none                                 | Gmet_2828                             |
| <i>mcp039</i>                               | none                                 | Gmet_3087                             |
| <b>Chemotaxis sensor histidine kinases</b>  |                                      |                                       |

|                                                   |           |                        |
|---------------------------------------------------|-----------|------------------------|
| <i>cheA-1</i>                                     | GSU1290   | Gmet_2427              |
| <i>cheA-2</i>                                     | GSU2222   | Gmet_2311              |
| <i>cheA-3</i>                                     | GSU3199   | none                   |
| <i>cheA-4</i>                                     | GSU0296   | Gmet_3266              |
| <i>cheA-5</i>                                     | none      | Gmet_1080              |
| <i>cheA-6</i>                                     | none      | Gmet_2710 <sup>2</sup> |
| <b>Chemotaxis methylesterases</b>                 |           |                        |
| <i>cheB-1</i>                                     | GSU0293   | Gmet_3269              |
| <i>cheB-2</i>                                     | GSU1145   | Gmet_2418              |
| <i>cheB-3</i>                                     | GSU2214   | Gmet_2304              |
| <i>cheB-4</i>                                     | GSU2756.1 | Gmet_2826              |
| <i>cheB-5, cheR-5</i>                             | none      | Gmet_0780              |
| <i>cheB-6</i>                                     | none      | Gmet_1075              |
| <i>cheB-7</i>                                     | none      | Gmet_2640              |
| <i>cheB-8</i>                                     | none      | Gmet_2711              |
| <b>Chemotaxis response regulator phosphatases</b> |           |                        |
| <i>cheC-1</i>                                     | GSU3200   | Gmet_3210              |
| <i>cheC-2</i>                                     | GSU0404   | Gmet_3118              |
| <i>cheC-3</i>                                     | GSU1618   | Gmet_1606              |
| <b>Chemotaxis complex proteins CheD</b>           |           |                        |
| <i>cheD-1</i>                                     | GSU0726   | none                   |
| <i>cheD-2</i>                                     | GSU1144   | Gmet_2419              |
| <i>cheD-3</i>                                     | GSU3201   | Gmet_3209              |
| <i>cheD-4</i>                                     | none      | Gmet_1076              |
| <b>Chemotaxis methyltransferases</b>              |           |                        |
| <i>cheR-1</i>                                     | GSU0295   | Gmet_3267              |
| <i>cheR-2</i>                                     | GSU1143   | Gmet_2420              |
| <i>cheR-3</i>                                     | GSU2215   | Gmet_2305              |
| <i>cheR-4</i>                                     | GSU3195   | Gmet_3212              |
| <i>cheR-5, cheB-5</i>                             | none      | Gmet_0780              |
| <i>cheR-6</i>                                     | none      | Gmet_1077              |
| <i>cheR-7</i>                                     | none      | Gmet_2641              |
| <i>cheR-8</i>                                     | none      | Gmet_2707              |
| <i>cheR-9</i>                                     | GSU0291   | Gmet_3271              |
| <b>Chemotaxis complex proteins CheV/CheW</b>      |           |                        |
| <i>cheV</i>                                       | GSU0879   | Gmet_2739              |
| <i>cheW-1</i>                                     | GSU0297   | Gmet_3265              |
| <i>cheW-2</i>                                     | GSU0684   | none                   |
| <i>cheW-3</i>                                     | GSU1142   | Gmet_2421              |
| <i>cheW-4</i>                                     | GSU1299   | none                   |
| <i>cheW-5</i>                                     | GSU1301   | none                   |
| <i>cheW-6</i>                                     | GSU2218   | Gmet_2307              |
| <i>cheW-7</i>                                     | GSU2220   | Gmet_2309              |
| <i>cheW-8 (mvhQ)</i>                              | GSU2416   | Gmet_3317              |
| <i>cheW-9</i>                                     | GSU2578   | none                   |

|                                       |           |           |
|---------------------------------------|-----------|-----------|
| <i>cheW-10</i>                        | GSU3197   | none      |
| <i>cheW-11</i>                        | none      | Gmet_1079 |
| <i>cheW-12</i>                        | none      | Gmet_2706 |
| <i>cheW-13</i>                        | none      | Gmet_2708 |
| <b>Chemotaxis response regulators</b> |           |           |
| <i>cheY-1</i>                         | GSU0403   | Gmet_3119 |
| <i>cheY-2</i>                         | GSU1286   | Gmet_2431 |
| <i>cheY-3</i>                         | GSU1289   | Gmet_2428 |
| <i>cheY-4</i>                         | GSU1619   | Gmet_1607 |
| <i>cheY-5</i>                         | GSU2212   | Gmet_2302 |
| <i>cheY-6</i>                         | GSU2223   | Gmet_2312 |
| <i>cheY-7</i>                         | GSU3198   | Gmet_3211 |
| <i>cheY-8</i>                         | GSU2756.2 | Gmet_2827 |
| <i>cheY-9</i>                         | GSU2217   | none      |
| <i>cheY-10</i>                        | GSU2219   | Gmet_2308 |
| <i>cheY-11</i>                        | none      | Gmet_0778 |

<sup>1</sup>Gene duplication in *G. sulfurreducens* makes it impossible to assign an ortholog of the *G. metallireducens* gene.

<sup>2</sup>Gmet\_2710 encodes a CheA protein with an internal REC domain.
