# Supplementary material for: The genome sequence of Geobacter metallireducens: features of metabolism, physiology and regulation common and dissimilar to Geobacter sulfurreducens
Source: PubMed Central journal article supplement (PMC2700814; doi:10.1186/1471-2180-9-109), 2009-05-27
Supplement: 1471-2180-9-109-S15.pdf [file 1471-2180-9-109-S15.pdf]

|           |     |         |         |                                                                                         |
|-----------|-----|---------|---------|-----------------------------------------------------------------------------------------|
| Gmet_I401 | (+) | 346972  | 347013  | C C C T C A C C C G C C C T T - C G G G C A C C C T C T C C C C C G G G G A G A G G G   |
| Gmet_I402 | (+) | 847962  | 847996  | C C C T C G C C C C C A G - - - - - C C C C T C T C A C C G A G G G C G A G G G         |
| Gmet_I403 | (-) | 848007  | 848048  | C C C T C A C C C G G C C T A - C G G C C A C C C T C T C C C C G A G G G A G G G G T   |
| Gmet_I404 | (-) | 2261974 | 2262015 | C C C T C A C C C G C C C T T - C G G G C A C C C T C T C C C T G G G G G A G A G G G   |
| Gmet_I405 | (+) | 2262033 | 2262068 | C C C C C T C A C - - C C C T - A - - - C C C C T C T C C C T C A G G G A G A G G G     |
| Gmet_I406 | (-) | 2434919 | 2434960 | C G T T C A C C C G G C C T T - C G G C C A C C C T C T C C C A C G G C G G G G A G A   |
| Gmet_I407 | (+) | 2930517 | 2930549 | C C C T C A C C C - - - - - - - - - C A A C C C T C T C C C G G A G G G A G A G G G     |
| Gmet_I408 | (-) | 2930561 | 2930602 | C C C T C A C C T G G C C T T - C G G C C A C C C T C T C C C G G A G G G C G A G G G   |
| Gmet_I409 | (-) | 2931995 | 2932036 | C C C T C A C C C G G C C T C - C G G C C A C C C T C T C C C C A A G G G C G A G G G   |
| Gmet_I410 | (+) | 3068138 | 3068180 | C C C T C A C C C G G C C T T G C G G C C A C C C T C T C C C C C G G G G A G A G G G   |
| Gmet_I411 | (+) | 3075684 | 3075725 | C C C T C A C C C G A C C T T - C G G C C A C C C T C T C C C C A A G G G A G A G G G   |
| Gmet_I412 | (-) | 3089494 | 3089535 | C C C T C A C C C G C C C T C - C G G G C A C C C T C T C C C A C G G G G A G A G G G   |
| Gmet_I413 | (+) | 3476916 | 3476957 | C C C T C A C C C G G C C T T - C G G C C A C C C T C T C C C C C A A G G A G A G G G   |
| Gmet_I414 | (-) | 3476969 | 3477004 | C C C C T T C A C - - C C C C - - - - - G C C C C T C T C C C T C A G G G C G A G G G   |
| Gmet_I415 | (+) | 3811572 | 3811613 | C C C T C A C C C G G C C T T - C G G C C A C C C T C T C C C T G A G G G A G A G G G   |
| Gmet_I416 | (-) | 3831391 | 3831432 | C C C T C A C C C G G C C T T - C G G C C A C C C T C T C C C T C C A G G C G G G G     |
| Gmet_I417 | (-) | 3930148 | 3930182 | C C C C C T C A C - - - - - - - - - C C T G G C C C T C T C C C T C A G G G A G A G G G |
| Gmet_I418 | (+) | 3930206 | 3930247 | C C C T C A T C C G G C C T T - C G G C C A C C T T C T T C C C T A G A G A G A A G G   |
| Gmet_I419 | (-) | 3939459 | 3939494 | C C C C C T C A C - - - - - - - - - C C T A G C C C T C T C C C A T A G G G A G A G G G |
| Gmet_I420 | (+) | 3939517 | 3939559 | C C C T C A T C C G G C C T T - C G G C C A C C T T C T C C C A T G G G G A G A A G G   |
