# Supplementary material for: The genome sequence of Geobacter metallireducens: features of metabolism, physiology and regulation common and dissimilar to Geobacter sulfurreducens
Source: PubMed Central journal article supplement (PMC2700814; doi:10.1186/1471-2180-9-109), 2009-05-27
Supplement: 1471-2180-9-109-S16.pdf [file 1471-2180-9-109-S16.pdf]

|            |     |         |         |                                                                                                                                                                                                                                                             |
|------------|-----|---------|---------|-------------------------------------------------------------------------------------------------------------------------------------------------------------------------------------------------------------------------------------------------------------|
| Gmet_R3001 | (+) | 158167  | 158284  | G A T A G A C G A T A A T A C T A A A C C A T C C G C G A G G G T G G G C G G A A A G C C T A C A G G G T C T C C C C - G A G A C A G C C G G G T C G C C - A A A T A T C T C A A C A G - - G A T A T G C - C G G C - - C C C G G C T T T T T T C A T G     |
| Gmet_R3002 | (-) | 264958  | 265068  | A A T A G A C G A C A A T A C T A A A C C A T C C G C G A G G A T G G G C G G A A A G C C C A T A G G G T C T C A C C - G A G A C A G C C G G G T T G C C G A A A T A T T T T T T - - - - - C G G C G A C C C G G C T T T T T C G T T T                     |
| Gmet_R3003 | (-) | 271381  | 271497  | G A T A C A C G A C A A T A C T A A A C C A T C C G C G A G G A T G G G C G G A A A G C C C A C A G G G T C T C A C C - G A G A C A G C C G G G T T G C C G A A A T G T C A C C A - - - - C A T T T T - - C G A C A G C C C G G C T T T T T T G T G C       |
| Gmet_R3004 | (+) | 325752  | 325867  | G A T A G A C G A T A A T A C T C A A C C A T C C G C G A G G A T G G G C G G A A A G C C T A C A G G G T C T C T C - G A G A C A G C C G G G T T G C C G A A A T A T C T C A C A - - - G A T A T G - - C G G C - - C C C G G C T T T T T T G T G T         |
| Gmet_R3005 | (+) | 1079463 | 1079581 | G A T A T - C G A C A A T A C T A A A C C A T C C G C G A G G G T G G G A C G G A A A G C C T A C A G G G T C T C T C - G A G A C A G C C G G G A T G C C G A A A T A T C A C A A T T C G - T G A T G C T - C G G T - - C C C G G C A T T T C T T T T T     |
| Gmet_R3006 | (-) | 1211932 | 1212051 | G A T A G - C G A T A C T A C T A A A C C A T C C G C G A G G A T G G G C G G A A A G C C T A C A G G G T C T C A T C - G A G A C A G C C G G G T T G C C G A A C T A T C A C A C A C A - G A T A G G - - C G G C G A C C C G G C T T T T T A T T T T       |
| Gmet_R3007 | (-) | 1212114 | 1212231 | G A T A G - C G A T A C T A C T A A A C C A T C C G C G A G G A T G G G C G G A A A G C C T A C A G G G T C T C A T C - G A G A C A G C C G G G T T G C C G A A C T A T C A C A A T A - - - G A T A G G - - C G G C G A C C C G G C T T T T T G T T T       |
| Gmet_R3008 | (-) | 1324366 | 1324481 | G A T A G T C G A T A A T A C T A A A C C A T T C G T G A G A A T G G G C G G A A A G C C T A C A G G G T C T T A C T - G A G A C A G C C G G G T T G C C G A A A T A T C A C C A - - - - G A T A T T - - C G - C A A C C C G G C T T T T T G T T G         |
| Gmet_R3009 | (-) | 1324505 | 1324620 | G A T A G A C G A C A A T A C T A A A C C A T T C G C G A G G A A T G G G C G G A A A G C C T A C A G G G T C T T A T T - G A G A C A G C C G G G T T G C C G A A A T A T C A T T A T - - - - G A T A A - T - C G G C - - C C C G G C T G T T C T G T T T   |
| Gmet_R3010 | (+) | 1334236 | 1334351 | G A T A G A C G A C A A T A C T A A A C C A T C C G C G A G G G T G G G A C G G A A A G C C T A C A G G G T C T C C C C - G A G A C A G C C G G G T C G C C G A A A T A T C G C A T - - - - C G A T A T T C - G A - - - C C C G G C T T T T T T T G T G     |
| Gmet_R3011 | (+) | 1911269 | 1911387 | G A T A G A C G A C A A T A C T A A A C C A T C C G C G A G G A T G G G C G G A A A A C C C A C A G G G T C T C C C T - G A G A C A G C C G G G T T G C C G A A A T A T C A A T T - - - - G A T A T A T A T G G C A A C C C G G C T G T T T T A T T A       |
| Gmet_R3012 | (+) | 1977790 | 1977908 | G A T A G A C G A T A A T A C T C A A C C A T T C G C G A G G A A T G G G C G G A A A G C C T A T A G G G T C T C A T G - C A G A C A G C C G G G T T G C C G A A A T A T C A T T T T - - - - A G A A T G A T G C G G C - - C C C G G C T T T T T T G C G T |
| Gmet_R3013 | (+) | 2280689 | 2280806 | G A T A G A C G A C A A T A C T C A A C C A T C C G T G A G G A T G G G C G G A A A G C C T A T T G G G T C T C A C C - G A G A C A G C C G G G T T G C C G A A A T A T C T G A C C A A - A G A T A T A - - - - G G C - - C C C G G C T T T T T T T G T G   |
| Gmet_R3014 | (+) | 2447616 | 2447732 | G A T A C A C G A C A A T A C T C A A C C A T C C G C G A G G A A T G G G C G G A A A G C C T A C A G G G T C T C C A G - C A G A C A G C C G G G T T G C C G A A A T A T C A C T - - - - C G A T G A T A G C G G T - - C C C G G C T T T T T T T G T G C   |
| Gmet_R3015 | (+) | 3913061 | 3913175 | G A T A G A C G A C A A T A C T T A A C C A T T C G C G A G A A T G G G C G G A A A G C C T A T A G G G T C T C A T G - G A G A C A G C C G G G T T G C C G A A A T A T C A C A - - - - C G A T A T T - - T G G T - - C C C G G C T T T T T T A T T G       |
| Gmet_R3016 | (+) | 3913269 | 3913383 | G G T A G A C G A T A A T A C T A A A C C A T T C C G C G A G A A T G G G C G G A A A G C C T A T A G G G T C T C C C T - G A G A C A G C C G G G T T G C C G A A A T A T C A C G - - - - C G A T A T T - - T G G T - - C C C G G C T T T T T T G T G T     |
