# Supplementary material for: The genome sequence of Geobacter metallireducens: features of metabolism, physiology and regulation common and dissimilar to Geobacter sulfurreducens
Source: PubMed Central journal article supplement (PMC2700814; doi:10.1186/1471-2180-9-109), 2009-05-27
Supplement: 1471-2180-9-109-S17.pdf [file 1471-2180-9-109-S17.pdf]

Table S10. Toxin/antitoxin pairs of *G. metallireducens* and *G. sulfurreducens*.

| <b><i>G. metallireducens</i> genes</b> | <b><i>G. sulfurreducens</i> genes</b> | <b>Annotation</b>                                           |
|----------------------------------------|---------------------------------------|-------------------------------------------------------------|
| Gmet_0678, Gmet_0677                   | absent                                | Phd-like antitoxin, ParE-like toxin                         |
| Gmet_3616, Gmet_3001                   | absent                                | HigB-like toxin C-terminal fragment, VapI-like antitoxin    |
| Gmet_A3570, Gmet_A3569                 | absent                                | CopG-like antitoxin, RelE-like toxin                        |
| Gmet_3077, Gmet_3076                   | absent                                | Phd-like antitoxin, hypothetical nucleic acid-binding toxin |
| Gmet_0220, Gmet_0221                   | absent                                | Phd-like antitoxin, RelE-like toxin                         |
| Gmet_2502, Gmet_2503                   | absent                                | MazE-like antitoxin, MazF-like toxin                        |
| Gmet_2602, Gmet_2603                   | GSU0737, GSU0736                      | hypothetical antitoxin, MazF-like toxin                     |
| Gmet_2972, Gmet_2973                   | absent                                | VapI-like antitoxin, HigB-like toxin                        |
| Gmet_2592, Gmet_2591                   | absent                                | HicA-like (antitoxin?), HicB-like (toxin?)                  |
| absent                                 | GSU0056, GSU0055                      | hypothetical antitoxin, ParE-like toxin                     |
| absent                                 | GSU1353, GSU1354                      | Phd-like antitoxin, ParE-like toxin                         |
| absent                                 | GSU2438, GSU2439                      | Phd-like antitoxin, RelE-like toxin                         |
| absent                                 | GSU2473, GSU2472                      | VapB-like antitoxin, VapC-like toxin                        |
