# Supplementary material for: The genome sequence of Geobacter metallireducens: features of metabolism, physiology and regulation common and dissimilar to Geobacter sulfurreducens
Source: PubMed Central journal article supplement (PMC2700814; doi:10.1186/1471-2180-9-109), 2009-05-27
Supplement: 1471-2180-9-109-S18.pdf [file 1471-2180-9-109-S18.pdf]

Table S11. The CRISPR3 locus of *G. metallireducens* contains spacers of variable length.

| <b>Spacer</b> | <b>Sequence</b>                               | <b>Length<br/>(bp)</b> |
|---------------|-----------------------------------------------|------------------------|
| Gmet_C001     | ACTATGCGCTCCACTTTGGCCCTGATGTTGGCCGT           | 35                     |
| Gmet_C002     | CGCCAAATCCGCCGCGCTCCACTCCCGGCAGAAGT<br>TGTC   | 39                     |
| Gmet_C003     | CAAGTCCGACTTGAAGATTTGTACTGTGCGGCC             | 34                     |
| Gmet_C004     | ACCATCACCCAGGGATCGGCACGGCCCGCATCG             | 34                     |
| Gmet_C005     | TTGGTGCCCCAGGAAGAGTGGAAACCGCTGATCA<br>GCGTCCG | 41                     |
| Gmet_C006     | TCGACCAACACCCCCGGCACGGTCATGTCGAAGG            | 34                     |
| Gmet_C007     | GACACCGGCCTCGACGGGTGGGACGCCGCCGCCT            | 34                     |
| Gmet_C008     | GGGAGGGACGGTGATATCGTGCAGGGAATACCAA            | 34                     |
| Gmet_C009     | ACCTGATGCTGCCCCCTGCGGTCTGCCGTGCGCGG           | 34                     |
| Gmet_C0010    | AGGTCATTGGACCGGGCGAAGATGCGGCCCTGA             | 33                     |
| Gmet_C0011    | GGAATCAGTTCGCCGCGTTTTGTCCGAAGGTTA             | 33                     |
| Gmet_C0012    | ACACAGCCTCTCAATATACCGATATCTCCTATTT            | 34                     |
