# Supplementary material for: The genome sequence of Geobacter metallireducens: features of metabolism, physiology and regulation common and dissimilar to Geobacter sulfurreducens
Source: BMC Microbiol. 2009 May 27;9:109. doi: 10.1186/1471-2180-9-109 (PMC2700814; doi:10.1186/1471-2180-9-109)
Supplement: Additional File 19 — Figure S8. Miscellaneous multicopy nucleotide sequences found in the G. metallireducens genome. These are alignments of 16 sets of miscellaneous DNA sequences in G. metallireducens that were matched by nucleotide-level BLAST. The sequence strand and start and stop nucleotide positions are indicated. (a) A palindromic sequence-containing family also found in the genomes of G. sulfurreducens, G. uraniireducens, and P. propionicus. (b) Sequences of this type were also found in the genomes of G. sulfurreducens and G. uraniireducens. (c) These sequences are unique to G. metallireducens. (d) The ends of these sequences form inverted repeats. Each sequence begins at the left extremity of the top line (the 5' side of the "+" strand of the chromosome), loops on the right side (switching strands), and continues to the left extremity of the bottom line (the 5' side of the "-" strand of the chromosome). A fragment related to Gmet_R6002 was found in the G. sulfurreducens genome. (e) These sequences are unique to G. metallireducens. (f) Sequences of this type were also found in the genomes of G. uraniireducens and G. bemidjiensis. (g) These sequences contain four octanucleotide repeats (consensus TWGTTGAY), two in tandem on each strand. (h) Sequences of this type were also found in the genome of G. sulfurreducens. (i) These sequences are unique to G. metallireducens. (j) These elements are located near each other. (k) These sequences are unique to G. metallireducens. (l-p) These elements are located near each other. Gmet_R0147 continues as Gmet_R0055, a tRNA-Asn gene (underlined). [file 1471-2180-9-109-S19.pdf]

|     |            |     |               |               |                                                                                                                                                                                                                                                                                                                                                 |
|-----|------------|-----|---------------|---------------|-------------------------------------------------------------------------------------------------------------------------------------------------------------------------------------------------------------------------------------------------------------------------------------------------------------------------------------------------|
| (b) | Gmet_R2001 | (+) | 1 0 1 0 1 6   | 1 0 1 0 8 6   | A C A T A A T T A T T G A G C G G T T C A C G C C A C G C G G C A T G A A C G C T C A T C C C C C C A A A C G A A C A T T T C T C C                                                                                                                                                                                                             |
|     | Gmet_R2002 | (+) | 1 1 1 8 1 8 2 | 1 1 1 8 2 5 2 | A A C T T T T A T T C A C G G T T C A C G C G G T G C G G T G A A C C G G T A T C T C C C A A A T G G A A C A T T C T G C C                                                                                                                                                                                                                     |
|     | Gmet_R2003 | (+) | 3 1 1 4 7 3 4 | 3 1 1 4 7 9 4 | A A C T C G T G A T T G A G C G G T T C A C G C C G C G C G G T G A A C C G C T C A T C T C C C G A A T G G A A C A T T T C T A C                                                                                                                                                                                                               |
|     | Gmet_R2004 | (+) | 3 3 5 6 5 6 1 | 3 3 5 6 6 1 7 | A A C T C G A T T A T T G A G C G G T T C A C G T G C - - - G C G C G T G A A A C C G C T A C T T C C C A A A T A G A A C A T T T C G T G                                                                                                                                                                                                       |
|     | Gmet_R4001 | (+) | 2 0 3 2 2 8   | 2 0 3 3 6 7   | G G C A C T T A C A A A A C T A T T T G C G G G A C C G G T T T G C G T T T T T G C G C G T G C G A A A G C T C A A C G T A C C A C G G G T A C G C G T C G C T T C C T G C T T G C C T T G C A A T G C C T C                                                                                                                                   |
| (c) | Gmet_R4002 | (-) | 3 6 2 2 8 8   | 3 6 2 4 2 7   | G G C T C A T G C A A A A C T A T G C G G G C G G G C G G T C T G C G T T G T T G C G C T C A C T C G A A A C C T A A C G T A C C A A C G G G T A C G C T G C T T C T C C T G C T C G C T T G C C T A G C A T C C A G C C T C T C A T C A C G T T T T G C A T G A G C T C                                                                       |
|     | Gmet_R4003 | (+) | 2 3 4 1 6 2 3 | 2 3 4 1 7 6 2 | G G C A C T T T G C A A A A C T A T T G C G G G T C G G G T T T G T T G C G G T T T G C G A A A G C T C A A C G T T A C C A A C G G G T A C G T T C A C T T C G C T C G C T T G C C G C T T A G C A T C C C G G C C T C T A C G T T T T G C A T G A G C T C T C                                                                                 |
|     | Gmet_R4004 | (+) | 3 2 1 5 6 4 0 | 3 2 1 5 6 8 5 | G G C T T T G C A A A A C T A T T G C G G A G C G G C C C T G C G T T G T T G C C G T C                                                                                                                                                                                                                                                         |
|     | Gmet_R4005 | (+) | 3 8 0 7 5 5 2 | 3 8 0 7 7 9 1 | A A G G C T G T T G A A A C T A T T G C G G T G C G G T T G C G T T G T T C C G C T C T C A A A A G C T C A A C G T A C C A C G G G T A C G C T C G C T G G C C T A G C A T C C C G G C T C C A C G A C G T T T T T C A A A G C G T G                                                                                                           |
|     | Gmet_R4006 | (+) | 3 8 3 7 6 0 8 | 3 8 3 7 7 4 6 | G G C T A T G C A A A A C T A T T G C G T G G C G G T T T G C G T T G T T G C G T T C A C T C G A A A G C T C A A C G T A C C G A G G G G T A C G C C T C A C T T C C T C G T T C T T T G C G C C - A G C A T C C C G G C C T C C C A A T C A C G T T T T T G C A C G T G C C T C                                                               |
| (d) | Gmet_R5001 | (-) | 3 5 0 1 8 6   | 3 5 0 2 2 7   | C G T A G G G G C A A T T C A T G A A T T G C C C C T A C A                                                                                                                                                                                                                                                                                     |
|     | Gmet_R5002 | (-) | 8 1 9 5 9 0   | 8 1 9 6 1 9   | C G T A A G G G C A A T T C A T G A A T T G C C C C T A C A                                                                                                                                                                                                                                                                                     |
|     | Gmet_R5003 | (+) | 1 1 8 9 8 9 9 | 1 1 8 9 9 2 8 | C G T A G G G G C A A T T C A T G A A T T G C C C C T A C A                                                                                                                                                                                                                                                                                     |
|     | Gmet_R5004 | (+) | 1 1 9 0 3 1 3 | 1 1 9 0 3 4 2 | T G T A G G G G C A A T T C A T G A A T T G C C C C T A C A                                                                                                                                                                                                                                                                                     |
|     | Gmet_R5005 | (+) | 1 1 9 1 9 4 5 | 1 1 9 1 9 7 4 | C G A T T T G G G C A A T T C A T G A A T T G C C C C T A C A                                                                                                                                                                                                                                                                                   |
| (e) | Gmet_R5006 | (-) | 1 2 8 1 3 0 5 | 1 2 8 1 3 3 4 | C G T A G G G G C A A T T C A T G A A T T G C C C C T A C C                                                                                                                                                                                                                                                                                     |
|     | Gmet_R5007 | (-) | 2 7 2 4 8 1 5 | 2 7 2 4 8 4 4 | C G T A G G G G C A A T T C G T G A A T T G C C C C T A C G                                                                                                                                                                                                                                                                                     |
|     | Gmet_R5008 | (-) | 3 5 2 1 2 9 2 | 3 5 2 1 3 2 1 | C G T A G G G G C A A T T C A T G A A T T G C C C C T A C A                                                                                                                                                                                                                                                                                     |
|     | Gmet_R6001 | (+) | 5 2 2 3 6 3   | 5 2 2 4 7 0   | - T A G C C A C A G A G G A C A C A G A G C G C A C A G A G A A T G G C T T T T T G G C C C A T G A G T C T T -                                                                                                                                                                                                                                 |
|     | Gmet_R6002 | (+) | 8 1 8 4 1 1   | 8 1 8 4 8 5   | T T T G C C A C A G A G A T C A C A G A G G A C A C A G A G A A A A G G A A A C A A A C T C C G T T T T C C                                                                                                                                                                                                                                     |
| (f) | Gmet_R6003 | (-) | 1 9 2 9 9 8 3 | 1 9 3 0 1 2 9 | T C T T G C C A C A G A G G G C A C A G A G A A C A C A G A G A A A A A C G G G A A G G A A A G G C T G G C T T C C G G C T T C C G C G C T T G A A                                                                                                                                                                                             |
|     | Gmet_R6004 | (+) | 3 8 4 7 0 9 5 | 3 8 4 7 2 3 4 | - T A G C C A C A G A G A A C T A C A G A G A T C A C A G A G A A A C C G T A A G A T C T T T C A                                                                                                                                                                                                                                               |
|     |            | (-) |               |               | T T T T G C C A C A G A G G T C A C A G A G A A C C A G T A A A A C C T T T A A G G C C C G G C T G C C A T A A C A C C G A T A C G T A A G G                                                                                                                                                                                                   |
|     |            | (+) |               |               | T T T T G C C A C A G A G G T C A C A G A G A C T C A G A G A A A A C A G C A T C A A A A A A A T A C G C C C G A A G T T A C C C T C T -                                                                                                                                                                                                       |
|     |            | (-) |               |               | - T A G C C A C A G A G G A C A C A G A G A C A C A G A G A A A A G T C G A A A A C A A A G C C C A C T T A C C C T G A C T T C G G C A                                                                                                                                                                                                         |
| (g) | Gmet_R7001 | (+) | 9 6 0 0 2 2   | 9 6 0 1 9 8   | G A A A G G G G C G G A G C T T C C G T C C G A A C C G A T C C A G C G T A C A T A G C C G G T T T C G T G G C A T G T G A A C A G C A T T T C C C G A G G C T T T C C C T C C C G T A T A C C G G A G T G T T T T C T G C G G G A T C G G T T C T C C C G A G A G C T C C C G C C C T T C C G G A A C C A G T G G T G G A A A G G T G A C A T |
|     | Gmet_R7002 | (+) | 1 3 5 7 6 2 3 | 1 3 5 7 7 9 9 | G G G A G G G G C C G A G C T T C C G T C C G A A G C G A T C A C G C T C A C C A C C G G G T T T C G G G C A C T G A A C A G T G A T C C G G G G C T A T G C C T G A G G T G G T T T T T T C G G G G A T C G C T T C C C G G A G A G C T C C C C C C C C C C G G G A G C A G T G G T G A A A A A T G G C C G A                                 |
|     | Gmet_R7003 | (+) | 2 3 7 7 9 2 8 | 2 3 7 8 1 0 4 | G G A A G G G C G G A T T C T C G T C C C A A G C G A T C C A G C G T C A C C A G C C G G T T T C G T G G C A C T G A A C A G C A T T T C C G G G G C T T C C C T C C C G A A A C G C C T A G G T G G T T T T T T C G G G G G A T C G C T T C C C G G A G A G C T C C G C C C T T C C G G A A C C A G T G G T G G A A A T G T G A C A T         |
|     | Gmet_R7004 | (+) | 2 4 2 4 5 6 0 | 2 4 2 4 7 3 6 | G G A A G G G G C G A A A C                                                                                                                                                                                                                                                                                                                     |
